# Supplementary material for: New insight for pharmacogenomics studies from the transcriptional analysis of two large-scale cancer cell line panels
Source: PubMed Central journal article supplement (PMC5680301; doi:10.1038/s41598-017-14770-6), 2017-11-09
Supplement: 41598_2017_14770_MOESM1_ESM.pdf [file 41598_2017_14770_MOESM1_ESM.pdf]

1 **New insight for pharmacogenomics studies from the transcriptional analysis of two**  
2 **large-scale cancer cell line panels**

3

4 **Benjamin Sadacca<sup>1,2,3</sup>, Anne-Sophie Hamy<sup>1,2</sup>, Cécile. Laurent<sup>1,2</sup>, Pierre Gestraud<sup>6</sup>,**  
5 **Hélène Bonsang-Kitzis<sup>1,2,7</sup>, Alice Pinheiro<sup>1,2</sup>, Judith Abecassis<sup>1,2,5,6</sup>, Pierre Neuvial<sup>3,8</sup>,**  
6 **Fabien Reyat<sup>\*1,2,7</sup>**

7

8 <sup>1</sup> Residual Tumor & Response to Treatment Laboratory (RT2Lab), PSL Research University,  
9 Translational Research Department, F-75248, Paris, France.

10 <sup>2</sup> U932 Immunity and Cancer; INSERM; Institut Curie; Paris, France.

11 <sup>3</sup> Laboratoire de Mathématiques et Modélisation d'Évry, Université d'Évry Val d'Essonne,  
12 UMR CNRS 8071, ENSIIE, USC INRA.

13 <sup>4</sup> Department of Tumor Biology, Institut Curie, Paris, F-75248, France.

14 <sup>5</sup> Mines Paristech, PSL-Research University, CBIO-Centre for Computational Biology, Mines  
15 ParisTech, Fontainebleau, F-77300 France.

16 <sup>6</sup> Institut Curie, PSL Research University, Mines Paris Tech, Bioinformatics and  
17 Computational Systems Biology of Cancer, INSERM U900, F-75005, Paris, France

18 <sup>7</sup> Department of Surgery, Institut Curie, Paris, F-75248, France.

19 <sup>8</sup> Institut de Mathématiques de Toulouse ; UMR5219 Université de Toulouse; CNRS UPS  
20 IMT, F-31062 Toulouse Cedex 9, France.

21

22 **Supplementary Figures legends**

23 **Supplementary Fig. 1:** Gene ontology analysis for gene clusters identified in CCLE and  
24 GDSC.

25 **Supplementary Fig. 2:** (A) Heatmap clustering with 471 cell lines (in columns) and selected  
26 genes (in rows), with GDSC data. (B) EMT status of the cell lines.

27 **Supplementary Fig. 3:** GSEA enrichment results. Green indicates gene modules significantly  
28 downregulated, whereas red indicates gene modules significantly upregulated. Results for  
29 CCLE are displayed in the left column; results for GDSC are displayed in the right column.

30 **Supplementary Fig. 4:** Pseudo  $F$  value for the 15 drugs common to CCLE and GDSC. The  
31 pseudo  $F$  index have been computed from the AUC values for each drug. The pseudo  $F$   
32 statistic is the ratio of between-cluster variance to within-cluster variance. Large values of  
33 pseudo  $F$  indicate well-separated, tight clusters. Drugs are listed in descending order of  
34 pseudo  $F$  values for clustering

35 **Supplementary Fig. 5:** Distribution of  $IC_{50}$  values for each cluster in CCLE and GDSC.  
36 Ordered according to mean  $IC_{50}$  for the cluster. From resistant (left) to sensitive (right).

37 **Supplementary Fig. 6:** Barplot of the number of mutations in cell lines  
38 The eight genes in bold were used for cluster characterization  
39 (A) Proportion of cell lines mutated for each gene. Red in CCLE and blue in GDSC.  
40 (B) Proportion of same cell lines mutated in CCLE and GDSC.  
41 (C) Among the mutated cell lines in CCLE and GDSC, proportion of same cell lines mutated.  
42 (D) Among the mutated cell lines in CCLE and GDSC, proportion of cell lines with exactly  
43 the same mutation.

44 **Supplementary Fig. 7:** Number of drugs tested for each cell line. Many drugs were not tested  
45 for a large set of cell lines (in red). Even when a test was performed, in many cases IC<sub>50</sub>  
46 could not be extracted and have been estimated as explained in the main text (green). Values  
47 in blue are observed IC<sub>50</sub> values.

48 **Supplementary Fig. 8:** AUC distribution for each cluster in CCLE and GDSC. Ordered  
49 according to the mean AUC. From resistant (left) to sensitive (right).

50 **Supplementary Fig. 9:** IC<sub>50</sub> distribution for each cluster in CCLE and GSK. Ordered  
51 according to the mean IC<sub>50</sub>. From resistant (left) to sensitive (right).

52 **Supplementary Fig. 10:** IC<sub>50</sub> distribution for each cluster in GDSC and GSK. Ordered  
53 according to the mean IC<sub>50</sub>. From resistant (left) to sensitive (right).

54 **Supplementary Fig. 11:** IC<sub>50</sub> distribution for each cluster in CCLE and gCSI. Ordered  
55 according to the mean IC<sub>50</sub>. From resistant (left) to sensitive (right).

56 **Supplementary Fig. 12:** IC<sub>50</sub> distribution for each cluster in GDSC and gCSI. Ordered  
57 according to the mean IC<sub>50</sub>. From resistant (left) to sensitive (right).

58 **Supplementary Fig. 13:** Mean viability distribution for each cluster in CCLE and gCSI.  
59 Ordered according to the average mean viability. From resistant (left) to sensitive (right).

60 **Supplementary Fig. 14:** Mean viability distribution for each cluster in GDSC and gCSI.  
61 Ordered according to the average mean viability. From resistant (left) to sensitive (right).

62 **Supplementary Fig. 15:** Drugs displaying significantly high (A) or low (B) levels of activity  
63 in a given pair of cell lines (i.e. in CCLE and GDSC) relative to the remaining cell lines. The  
64 138 drugs from CCLE and GDSC were used. Colors correspond to the drug target family.

65 (C) Distribution, by target family, of the 138 drugs.  
66 (D) The drugs significant for each cell line cluster. Drugs and clusters are ordered by number  
67 of associations.

68 **Supplementary tables legends**

69 **Supplementary Table 1:** Mutations for each cluster in CCLE dataset. The proportion of cell  
70 lines mutated, with raw and adjusted Fisher  $p$ -values.

71 **Supplementary Table 2:** Mutations for each cluster in GDSC dataset. The proportion of cell  
72 lines mutated, with raw and adjusted Fisher  $p$ -values.

73 **Supplementary Table 3:** Significant associations between CCLE and GDSC found in both  
74 dataset with  $IC_{50}$ .

75 **Supplementary Table 4:** Number of cell lines with sensitivity measure in each dataset. The  
76 numbers were computed based on the cell lines common to each pair of dataset.

77 **Supplementary Table 5:** List of drugs significantly associated with a sensitivity phenotype  
78 for each cluster.

79 **Supplementary Table 6:** List of drugs significantly associated with a resistant phenotype for  
80 each cluster.

81 **Supplementary Table 7:** Significant associations between CCLE and GDSC found in both  
82 dataset with AUC.

83 **Supplementary Table 8:** Significant associations between CCLE and GSK found in both  
84 dataset with  $IC_{50}$ .

85 **Supplementary Table 9:** Significant associations between CCLE and gCSI found in both  
86 dataset with  $IC_{50}$ .

87 **Supplementary Table 10:** Significant associations between CCLE and gCSI found in both  
88 dataset with mean viability.

89

90

91



113 Supplementary Information

114 Discrepancies in mutational data between CCLE and GDSC

115 We investigated a set of 64 genes for the presence of mutations in both the CCLE and GDSC  
116 datasets. We investigated the consistency of mutation patterns. Thirteen genes were reported  
117 to have no mutations in GDSC, in any of the 471 cell lines studied (AKT2, CCND1, CCND2,  
118 CCND3, CDK4, CDK6, EP300, FGFR2, MDM2, MLLT3, MYCL1, MYCN and  
119 SMARCB1). We focused on the remaining 51 genes. The most frequently mutated gene was  
120 TP53, with a frequency over 60%, mutation frequencies remaining below 20% for the other  
121 genes (Supplementary Fig. 6A). A previous study reported high levels of agreement  
122 concerning the reported presence of mutations in identical cell lines<sup>1</sup>. However, for cell lines  
123 displaying mutations of at least one of these genes, the mean proportion of cell lines with  
124 mutations of the same genes was about 20% (Supplementary Fig. 6C) and the mean  
125 proportion of cell lines displaying identical mutations within the genes was 44%  
126 (Supplementary Fig. 6D). Only for eight genes (TP53, KRAS, NRAS, APC, PIK3CA, BRAF,  
127 PTEN and RB1) did at least 5% of identical cell lines display mutations in both datasets  
128 (Supplementary Fig. 6B). Furthermore, the proportion of identical cell lines mutated was  
129 64%, and the mutations observed were identical in 84% of cases. By contrast, 12% of  
130 identical cell lines had mutations for the remaining genes, with 36% of the mutations  
131 observed identical (Supplementary Fig. 6C-D).

132 Drug screening data

133 The large-scale drug screening programs of the Broad and Sanger Institutes have provided to  
134 the scientific community an unprecedented wealth of publicly available data. Molecular data  
135 have been systematically collected for each cell line, but far less information is available for

136 drug screening. Considering the 471 cell lines common to CCLE and GDSC, only 47% of the  
137 cell lines from CCLE and 90% of those from GDSC have been tested for at least one drug  
138 (Supplementary Fig. 7). In CCLE and GDSC, 28% and 22% of the cell lines, respectively,  
139 were tested for all compounds. Moreover, in many cases (25% in CCLE and 45% in GDSC) it  
140 was not possible to extract the  $IC_{50}$  from the dose-response curve. In these cases, the  $IC_{50}$  was  
141 set to the maximum concentration used for screening in the CCLE study, whereas a  
142 mathematical extrapolation was applied in the GDSC study. In order to overcome these  
143 issues, both study also report the AUC (area under the dose response curve) that can always  
144 be calculated.

145

#### 146 Comparison between CCLE and GDSC based on AUC

147 To evaluate the relevance of our method to the variation of drug sensitivity metric, we looked  
148 at the area under the dose response curve (AUC). We evaluate the robustness of our cell line  
149 classification with the 15 drugs shared between CCLE and GDSC.

150

151 We first evaluated whether our clustering was more discriminant than the tissue of origin of  
152 the cell lines, in terms of drug response. We calculated a pseudo  $F$ -statistic using the AUC  
153 values for each of the 15 drugs common to CCLE and GDSC. Ten out of fifteen drugs had a  
154 higher ratio in CCLE and GDSC for our clustering than for clustering based on tissue source  
155 (Supplementary Fig. 4). This trend was confirmed by a  $t$ -test comparing the pseudo  $F$  values  
156 for our clustering with those for ‘tissue partitioning’ (CCLE  $t$ .test  $p$ -value = 0.011, GDSC  
157  $t$ .test  $p$ -value=0.043).

158

159 We then performed the same analyses as those performed with the  $IC_{50}$ , to identify  
160 association between cell line clusters and drug response but based on the AUC. Four out of

161 the seven cell lines clusters-drugs associations were robustly found using the IC<sub>50</sub> and the  
162 AUC (Supplementary Table 7 and Fig. 8): ADG cluster being sensitive to erlotinib, SKCM  
163 being sensitive to the Raf kinase B inhibitor PLX4720 and the MEK inhibitor AZD6244  
164 whereas the latter is not active in BRCA cell line cluster. In addition, SKCM cluster appears  
165 resistant to crizotinib (ALK inhibitor) and AZD0530 (Src and Abl inhibitor) that is  
166 concordant with the wild-type mutational status of SCKM cells for ALK, Abl1/2 and Src<sup>2</sup> .  
167 Lapatinib appears inefficient in HAL cluster that is consistent as no EGFR or ERBB2  
168 mutation have been reported in HAL cell lines in both CCLE and GDSC.  
169 Many cell lines never achieved 50% inhibition for many drugs. In this case, data have been  
170 either truncated by the maximum dose tested (as in CCLE), either they have been extrapolated  
171 (as in GDSC) (Supplementary Figure 5). On the contrary the AUC can always be calculated.  
172 These variabilities can explain the variation of results. However more than half of the cell  
173 lines clusters-drug associations were found using both IC50 and AUC.

174

#### 175 Comparison between CCLE, GDSC and GSK

176 We explored the relevance of our classification with two outside datasets. For this, we kept  
177 our robust clustering of cell lines define with the CCLE and GDSC. For each dataset and each  
178 drug separately, we investigated whether the mean drug sensitivity measure available of a  
179 given cell line cluster differed significantly from those for the other cell line clusters (see  
180 Materials and Methods). We then investigate if significant cell line clusters-drug associations  
181 can be found in these different datasets.

182 First we consider the third dataset used by Haibe-Kains et al<sup>1</sup>, the GlaxoSmithKline cell line  
183 collection (GSK)<sup>3</sup>. This panel is composed of 319 cell lines that have been screened on 19  
184 drugs. Only lapatinib and paclitaxel have been tested by GSK among the 15 drugs shared  
185 between CCLE and GDSC. A set of 194 cell lines was common to the three studies. However

186 the actual number of cell lines for which we have a sensitivity measure for lapatinib and  
187 paclitaxel is smaller especially in GDSC. Supplementary Table 4 shows the number of cell  
188 lines with a sensitivity measure for each drug in each dataset among the 194 cell lines shared  
189 between CCLE, GDSC and GSK. Only 70 cell lines have a sensitivity measure for paclitaxel  
190 and lapatinib in GDSC. Moreover, the number of cluster with less than 3 cell lines goes up to  
191 4 for paclitaxel and 5 for lapatinib. Given the too small number of cell lines available, we  
192 therefore compared only the results between CCLE and GSK. Comparisons were based on  
193  $IC_{50}$ , the unique measure available in GSK. Two associations were found in both CCLE and  
194 GSK suggesting that lapatinib is inactive in SKCM and in Mixed 1 clusters (Supplementary  
195 Table 8, Supplementary Fig. 9 and 10). Prickett et al<sup>4</sup> found some evidence that lapatinib may  
196 be more active in melanoma cell lines with ErbB4 mutations than wild-type melanoma cells.  
197 However, no ErbB4 mutations have been called in melanoma cells from cluster SKCM<sup>2</sup>.

198

#### 199 Comparison between CCLE, GDSC and gCSI

200 Since the set of common cell lines and drugs was small between CCLE, GDSC and GSK  
201 (Supplementary Table 4), we repeated the analysis with the panel introduced by the  
202 Genentech Cell Line Screening Initiative (gCSI)<sup>5</sup>. Data were recovered from the *R* package  
203 *compareDrugScreens*. A panel of 244 unique cell lines and 5 drugs overlap between CCLE,  
204 GDSC and gCSI. Once again the overlap of cell lines between GDSC and gCSI is relatively  
205 small (Supplementary Table 4). Drug sensitivity measure was available for less than 3 cell  
206 lines in 4 clusters for erlotinib and lapatinib; in 3 cell line clusters for crizotinib and  
207 paclitaxel. For these reasons, we focused only on PD0325901 when comparing GDSC and  
208 gCSI. Two measures of sensitivity are available in *compareDrugScreens*. In addition to the  
209 classical  $IC_{50}$ , they introduced the mean viability statistic that is the arithmetic average of the  
210 fitted viabilities at each tested dose. This metric is closely related to the AUC. We used the

211 mean viability to evaluate the robustness of our cell line classification to the drug sensitivity  
212 metric variation.

213 Height associations were found significant in both CCLE and gCSI using the IC<sub>50</sub>  
214 (Supplementary Table 9, Supplementary Fig. 11 and 12). Among them three were also found  
215 when comparing CCLE to GDSC: ADG cluster sensitive to erlotinib and lapatinib;  
216 PD0325901 actives in SKCM. In addition, the resistance of Mixed 1 cluster to lapatinib found  
217 when comparing CCLE to GSK appeared once again significant here. Additional associations  
218 were found specifically. Erlotinib were inactive to treat cells from Mixed 1, GLSR and  
219 SKCM. BRCA cluster was found resistant to PD0325901. Regarding the comparison with  
220 GDSC, a strong trend could be observed between SKCM and PD0325901 (gCSI Effect =  
221 0.39, adjusted p-value =3.05E-10, GDSC Effect = 0.13, adjusted p-value =0.058).

222 Considering the mean viability statistic (Supplementary Table 10, Supplementary Fig. 13 and  
223 14), 2 associations among those identified when comparing CCLE to GDSC were found  
224 again: ADG cluster sensitive to erlotinib and SKCM sensitive to PD0325901. In addition, 8  
225 more clusters were found resistant to erlotinib: SCLC, Mixed 1, HAL, GLSR and SKCM.  
226 These findings were supported by several phase II studies reporting the inactivity of erlotinib  
227 in patients with gliomas<sup>6,7</sup> and melanomas<sup>8</sup> as well as the lack of EGFR mutation in small-cell  
228 lung cancers<sup>9</sup>. BRCA appeared resistant to the MEK inhibitor PD0325901. It has been shown  
229 that PD0325901 is more active in basal-like breast cancer lines than in luminal and Her2+  
230 lines<sup>10</sup>. Indeed, only 3 out of the 10 breast cancer cell lines from BRCA cluster that have been  
231 tested for PD0325901 are TNBC. For GDSC, similar results than those found with the IC<sub>50</sub>  
232 were found regarding the sensitivity of SKCM to PD0325901.

233

234

235

236 Distinct drug profiles were associated with the various cell line clusters

237 The GI cell line cluster was sensitive to drugs targeting the ERK signaling pathway (MEK1/2,  
238 Hsp90): 17AAG, AZD6244, PD0325901 (Supplementary Fig. 15). The targeting of this  
239 pathway was also found to be effective against the cell lines of the ADG cluster, but only for  
240 drugs targeting EGFR and ERBB2. Furthermore, these cell lines seems to be particularly  
241 sensitive to drugs acting on the cytoskeleton. SKCM cell lines were sensitive to drugs  
242 inhibiting the ERK signaling pathway, regardless of the protein from this pathway targeted  
243 (BRAF, MEK1/2, FLT3, JAK2, NTRK1, RET). Hematopoietic cells were sensitive to  
244 molecules targeting apoptosis, the cell cycle and the cytoskeleton, and to inhibitors of PARP,  
245 topoisomerase I and the ERK signaling pathway. AKT-INHIBITOR-VIII and MK-2206, two  
246 AKT1/1 inhibitors, were found efficient on BRCA cells. Indeed, the PI3K/mTOR pathway is  
247 commonly deregulated in breast cancer<sup>11</sup>. The 15 drugs to which cell lines of the GLSR were  
248 sensitive included seven PIK3/mTor inhibitors. Kinase inhibitors and chemotherapy agents  
249 targeting the mitotic spindle were also identified as potentially effective drugs against GLSR  
250 cells. Chemotherapy agents (gemcitabine, bleomycin, vinblastine) were the most active drugs  
251 for killing cells from the Mixed 1 cell line cluster. The other two heterogeneous clusters were  
252 each sensitive to only one drug: midostaurin-a PI3K/mTOR inhibitor for Mixed 2, and  
253 vorinostat, a HDAC inhibitor, for Mixed 3. Finally, the cell lines of the EDOT cluster were  
254 sensitive only to the chemotherapy agent doxorubicin.

255

256 Resistance profiles were identified for 163 associations between cell line clusters and drugs.  
257 More than 30% of these associations involved inhibitors of the ERK and PI3K/mTOR  
258 signaling pathways. All but one of the clusters appeared to be resistant to at least three drugs  
259 targeting this pathway. The exception was the Mixed 2 cluster, which was resistant only to the  
260 MEK1/2 inhibitor AZD6244). The cell lines of the various clusters were otherwise resistant to

261 a broad range of diverse drugs. The cell lines of the SCLC cluster were resistant to the largest  
262 number of molecules (22% of all the drugs tested), including, drugs targeting the apoptosis,  
263 NOTCH or Wnt signaling pathways. Drugs targeting the cytoskeleton, mitosis and replication  
264 appeared to be the least effective for killing the cell lines of the GI cluster. By contrast, the  
265 cell lines of the ADG cluster were found to be resistant to a drug targeting the cytoskeleton, a  
266 drug targeting the Wnt pathway and a drug targeting G-protein-coupled receptors.  
267 Topoisomerase I inhibitors, such as topotecan and camptothecin, were found ineffective to  
268 kill BRCA cells. Surprisingly, gemcitabine and methotrexate were also found to be inefficient  
269 against these cells, despite their widespread use in clinical practice. Mixed clusters presented  
270 only a small number of resistant associations.  
271

272 **References**

- 273 1. Haibe-Kains, B. *et al.* Inconsistency in large pharmacogenomic studies. *Nature* **504**,  
274 389–93 (2013).
- 275 2. Barretina, J., Caponigro, G. & Stransky, N. The Cancer Cell Line Encyclopedia  
276 enables predictive modelling of anticancer drug sensitivity. *Nature* **483**, 603–607  
277 (2012).
- 278 3. Greshock, J. *et al.* Molecular target class is predictive of in vitro response profile.  
279 *Cancer Res.* **70**, 3677–3686 (2010).
- 280 4. Prickett, T. D. *et al.* Analysis of the tyrosine kinome in melanoma reveals recurrent  
281 mutations in ERBB4. *Nat. Genet.* **41**, 1127–1132 (2009).
- 282 5. Haverty, P. M. *et al.* Reproducible pharmacogenomic profiling of cancer cell line  
283 panels. *Nature* **533**, 333–337 (2016).
- 284 6. Van Den Bent, M. J. *et al.* Randomized phase II trial of erlotinib versus temozolomide  
285 or carmustine in recurrent glioblastoma: EORTC brain tumor group study 26034. *J.*  
286 *Clin. Oncol.* **27**, 1268–1274 (2009).
- 287 7. Raizer, J. J. *et al.* A phase II trial of erlotinib in patients with recurrent malignant  
288 gliomas and nonprogressive glioblastoma multiforme postradiation therapy. *Neuro.*  
289 *Oncol.* **12**, 95–103 (2010).
- 290 8. Wyman, K., Kelley, M., Puzanov, I. & Sanders, K. Phase II study of erlotinib given  
291 daily for patients with metastatic melanoma (MM). *J. Clin.* (2006).
- 292 9. Shigematsu, H. *et al.* Clinical and Biological Features Associated With Epidermal  
293 Growth Factor Receptor Gene Mutations in Lung Cancers. *JNCI J. Natl. Cancer Inst.*  
294 **97**, 339–346 (2005).
- 295 10. Hoeflich, K. P. *et al.* In vivo antitumor activity of MEK and phosphatidylinositol 3-  
296 kinase inhibitors in basal-like breast cancer models. *Clin Cancer Res* **15**, 4649–4664



297 (2009).

298 11. Tsimberidou, A.-M. *et al.* Personalized Medicine in a Phase I Clinical Trials Program:  
299 The MD Anderson Cancer Center Initiative. *Clin. Cancer Res.* **18**, 6373–6383 (2012).

300

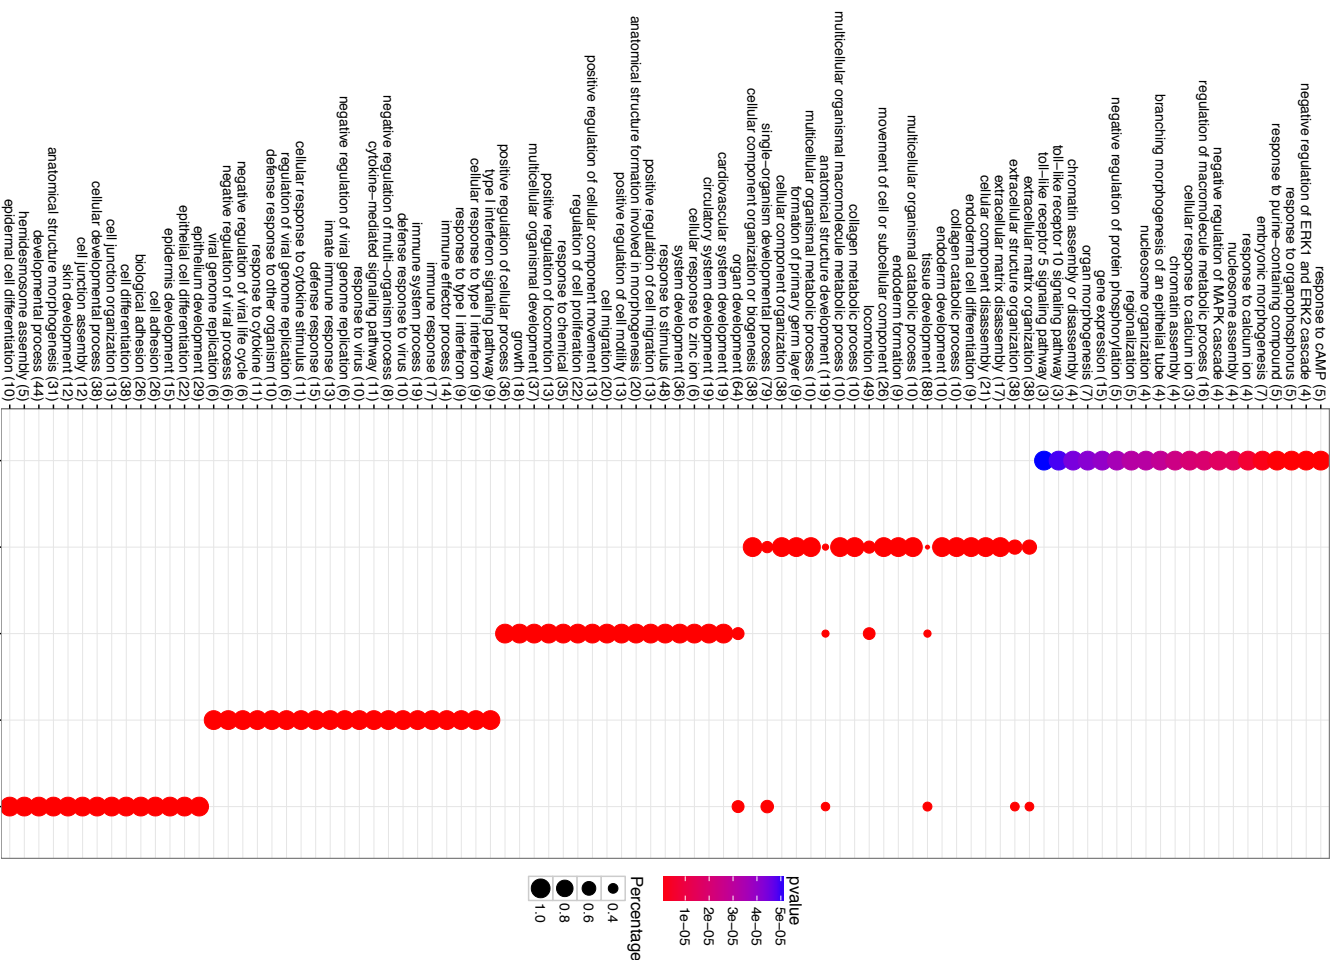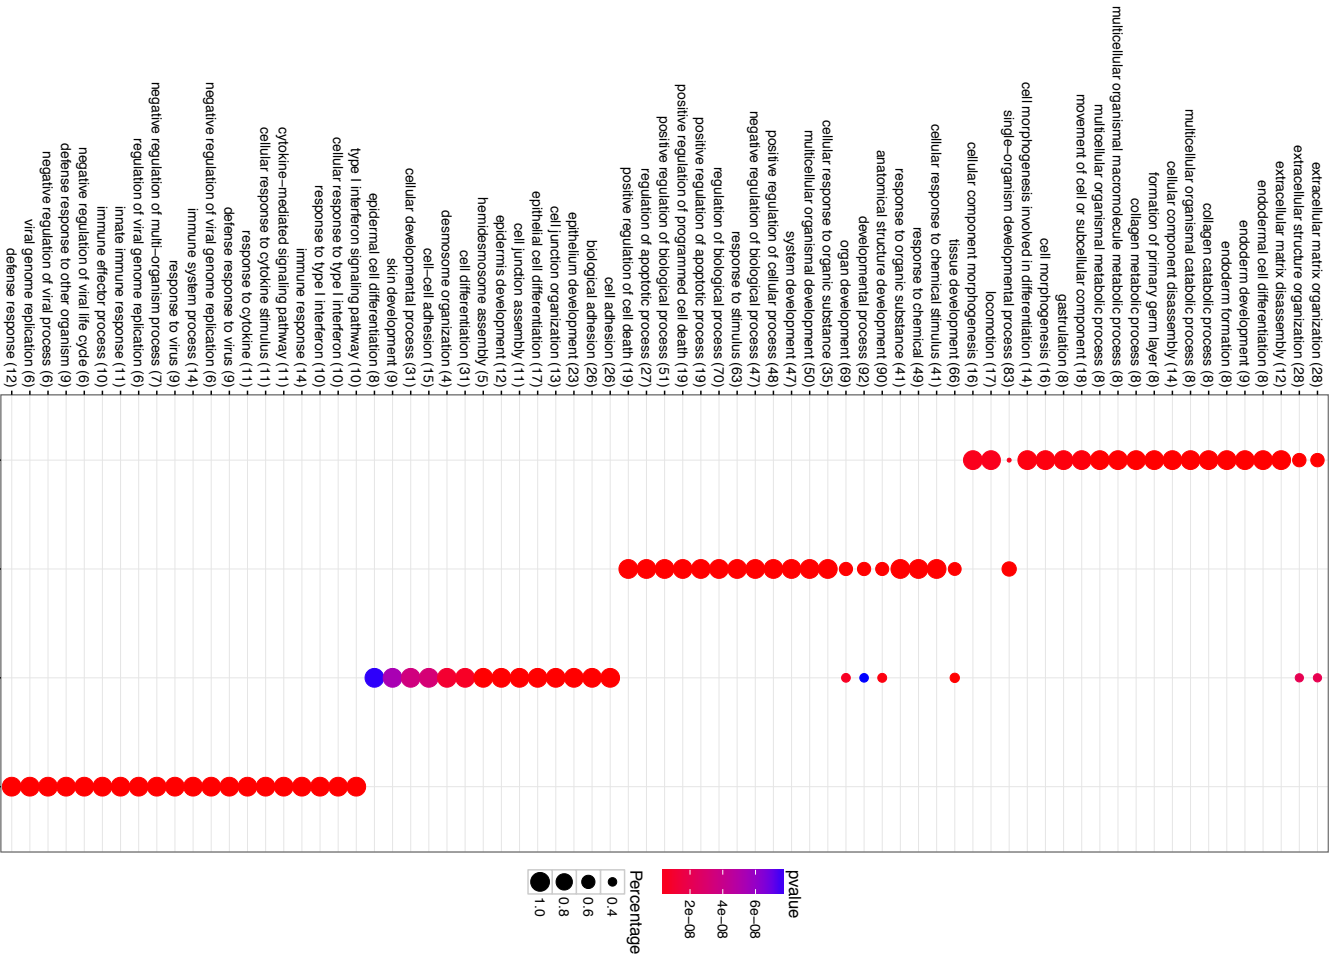

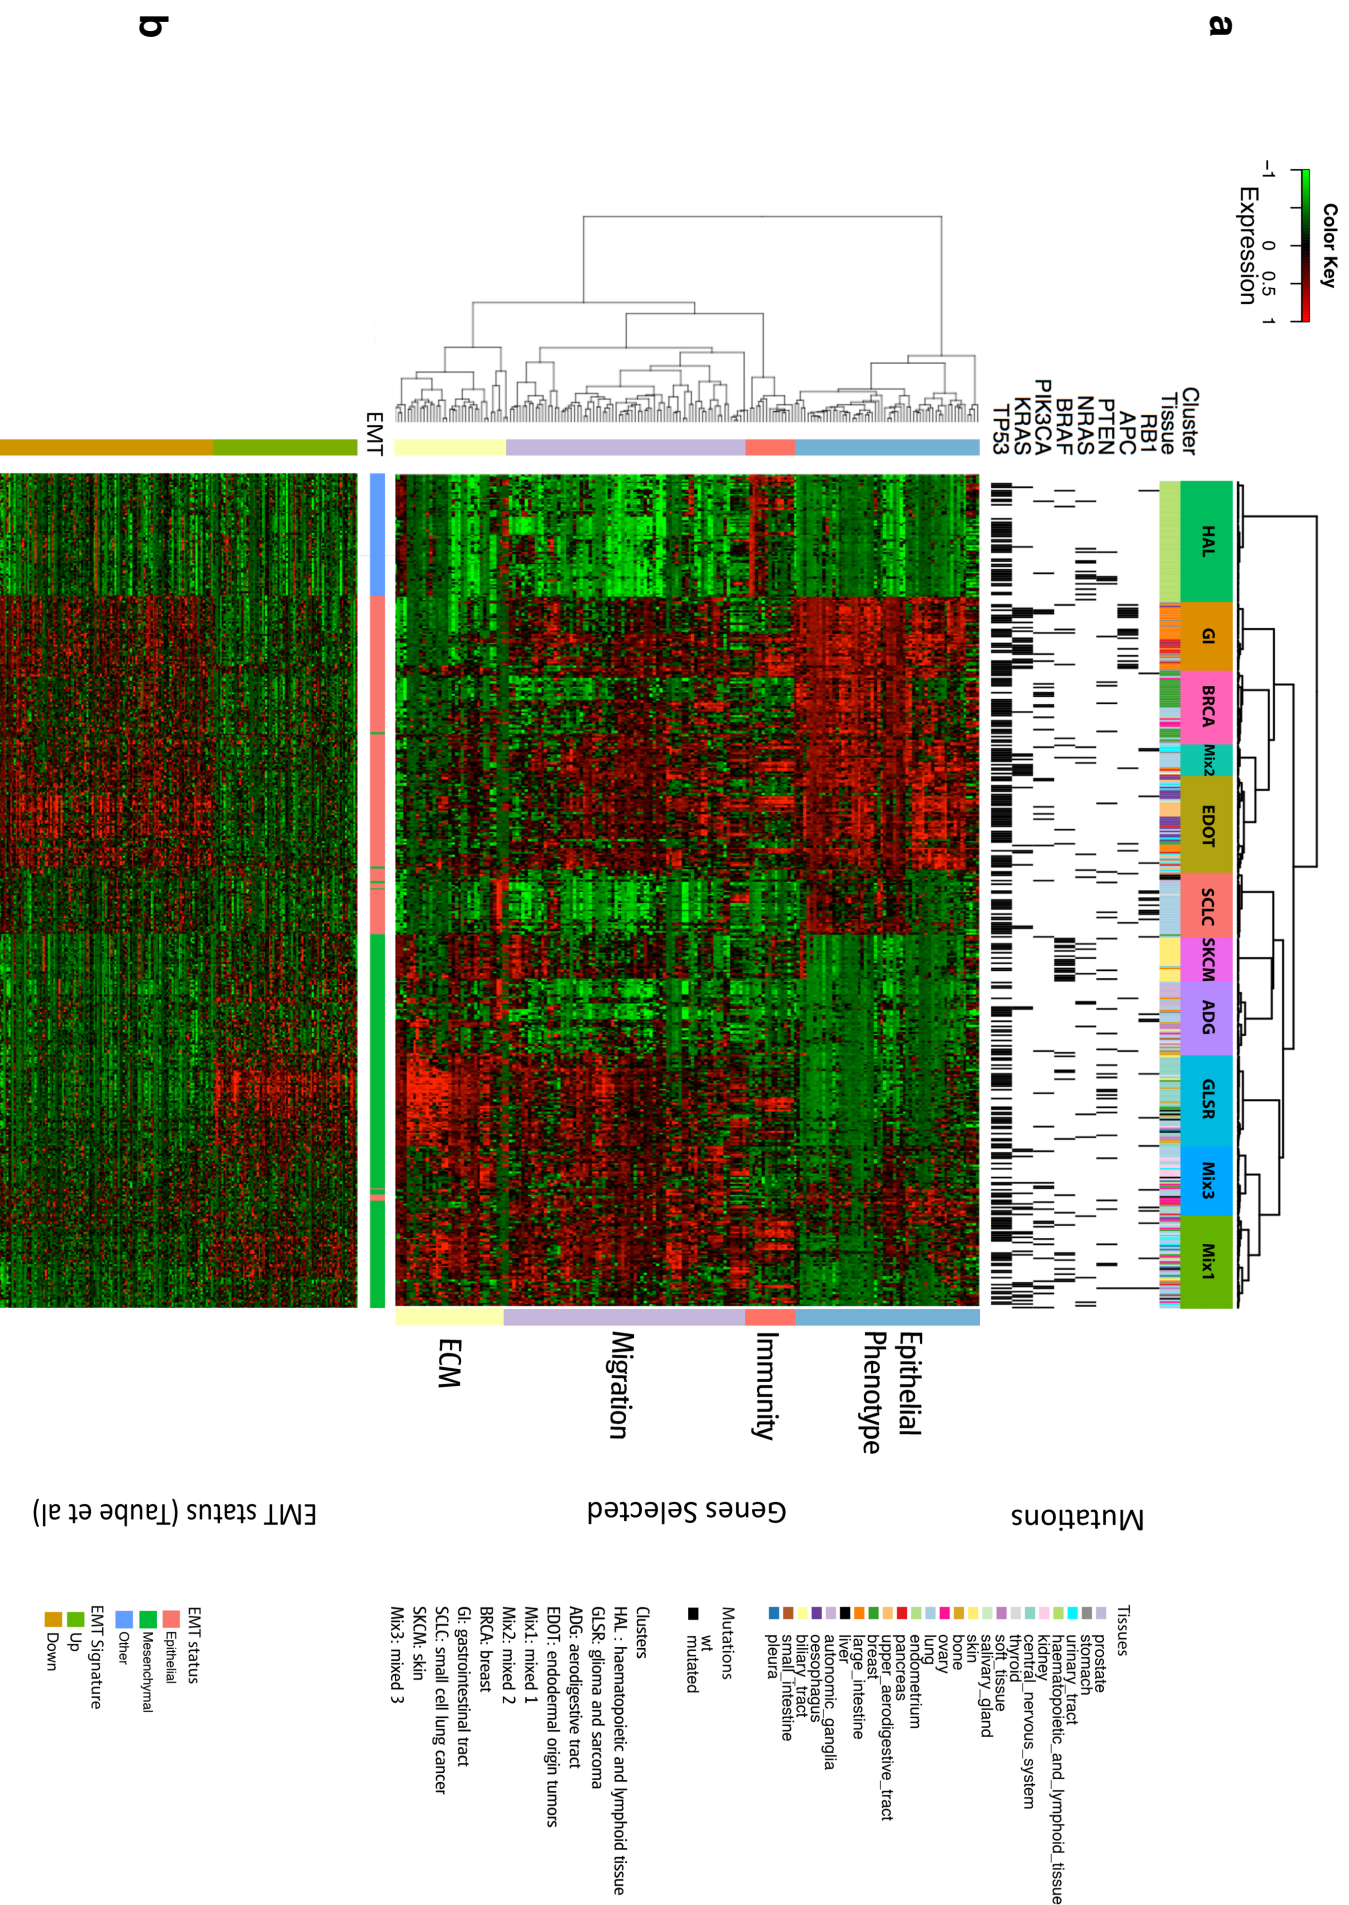

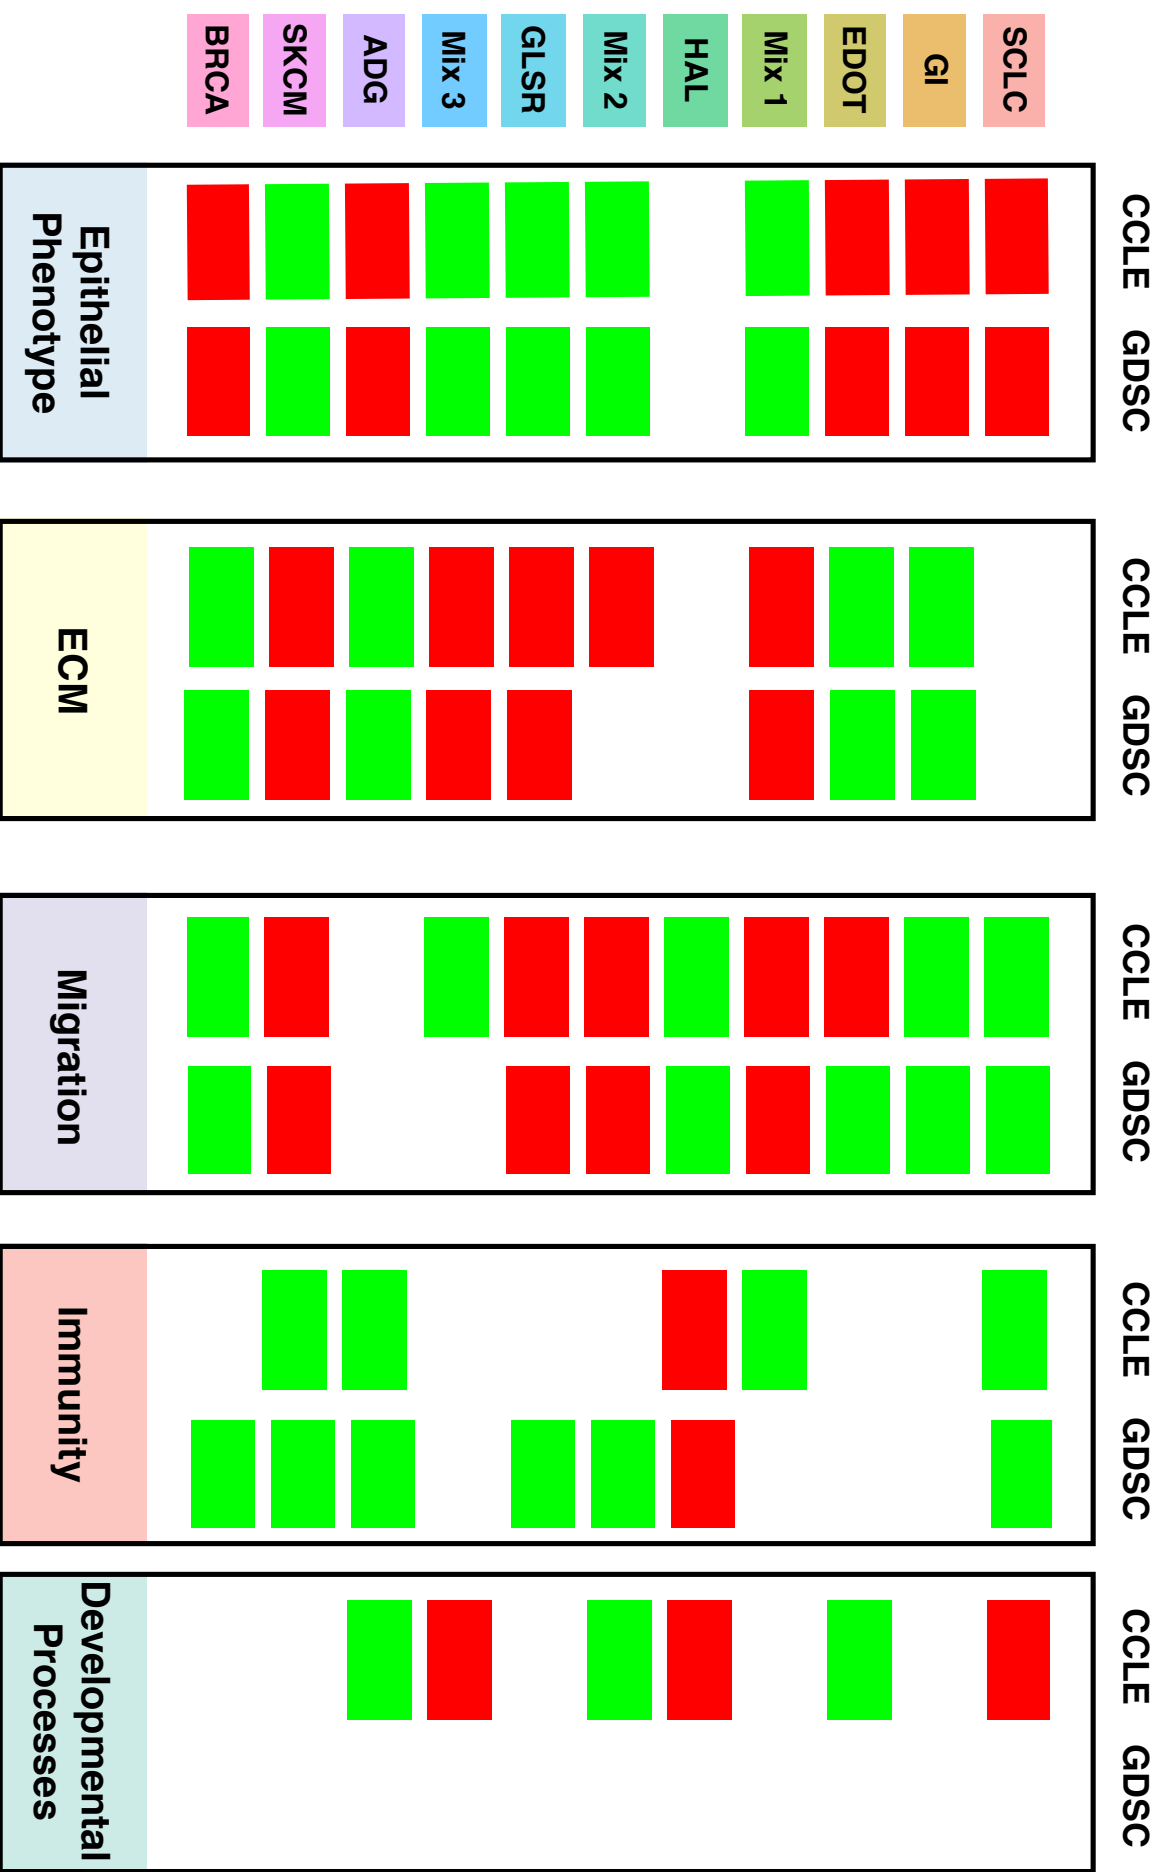

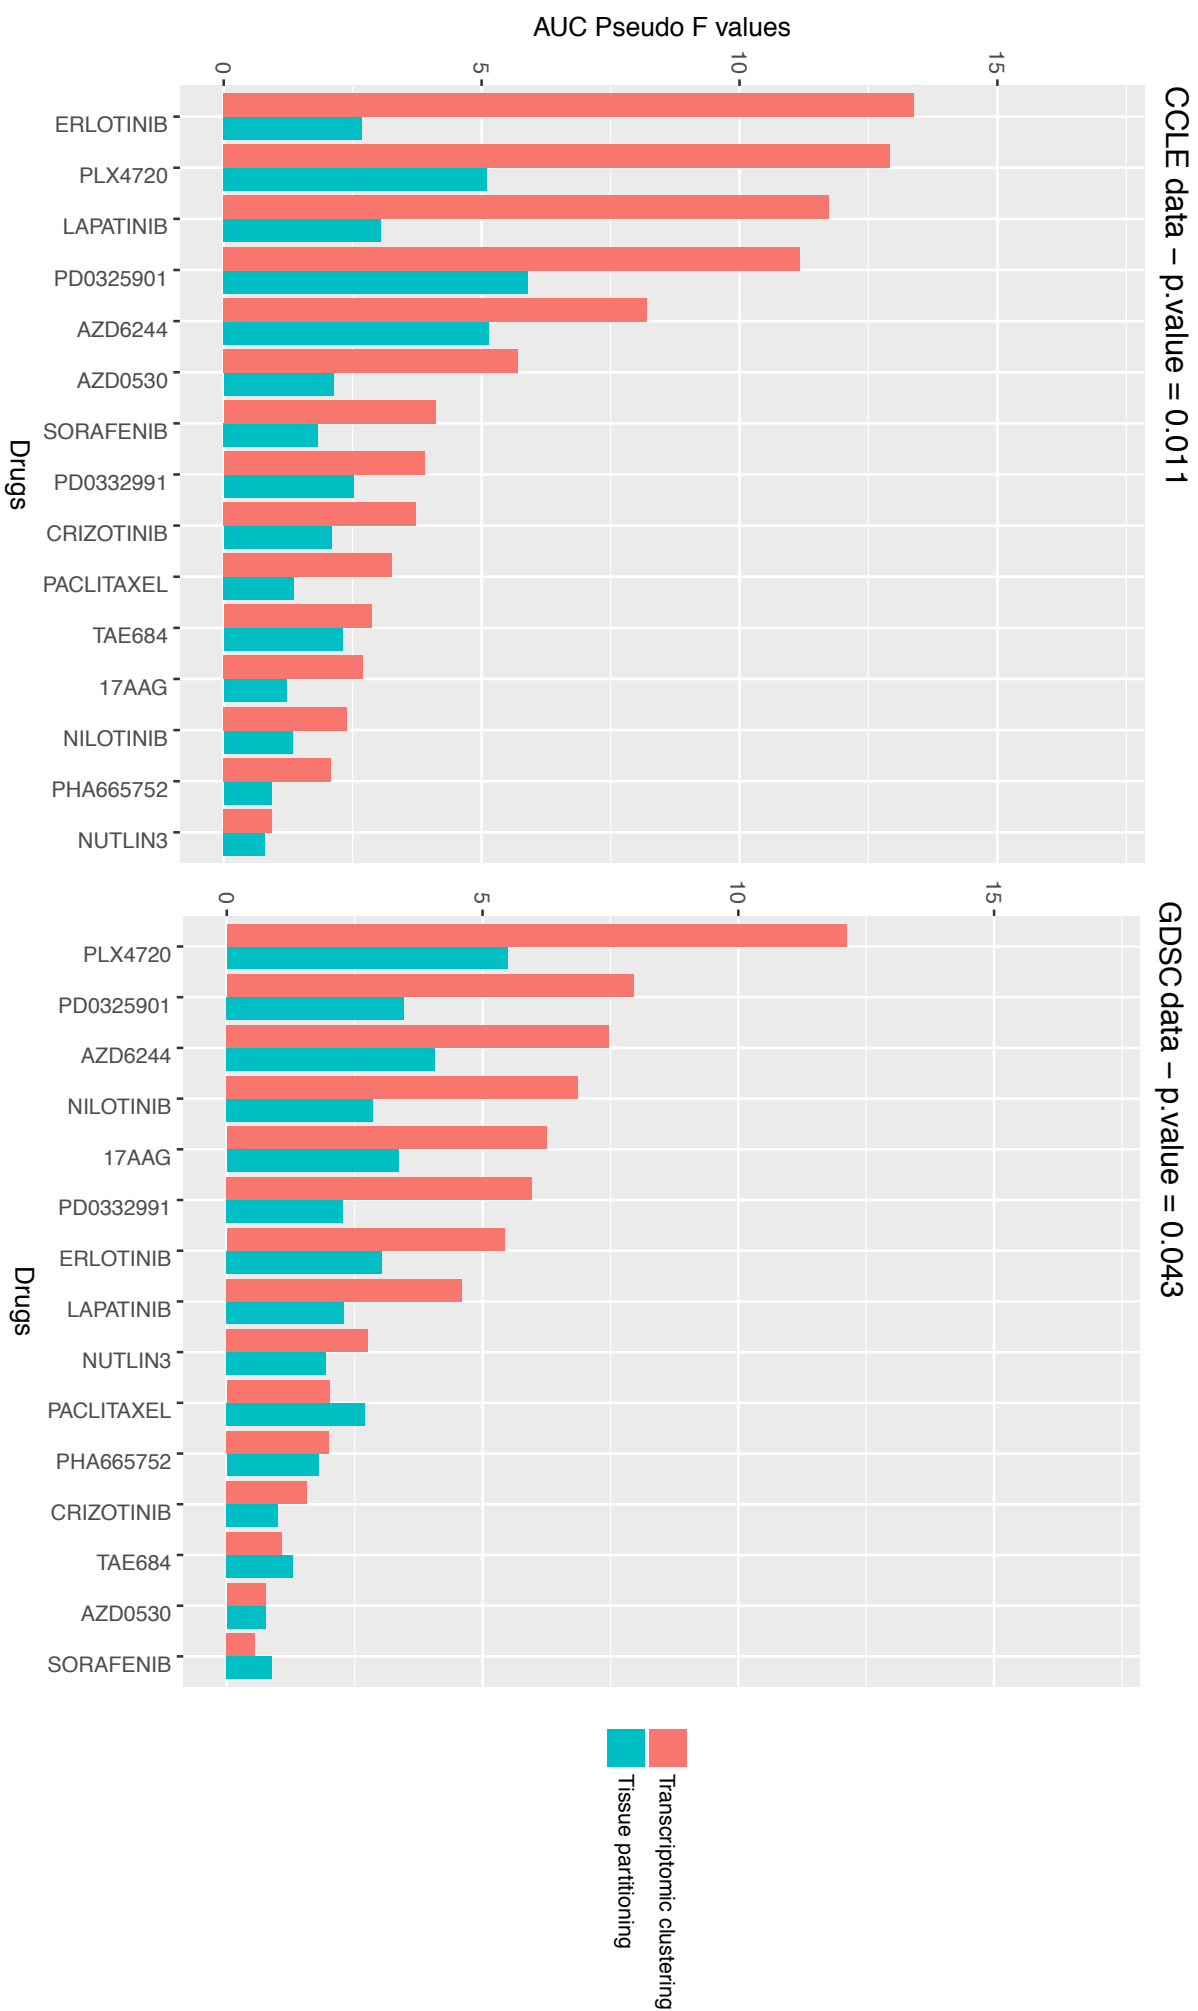

# Supplementary Fig.5

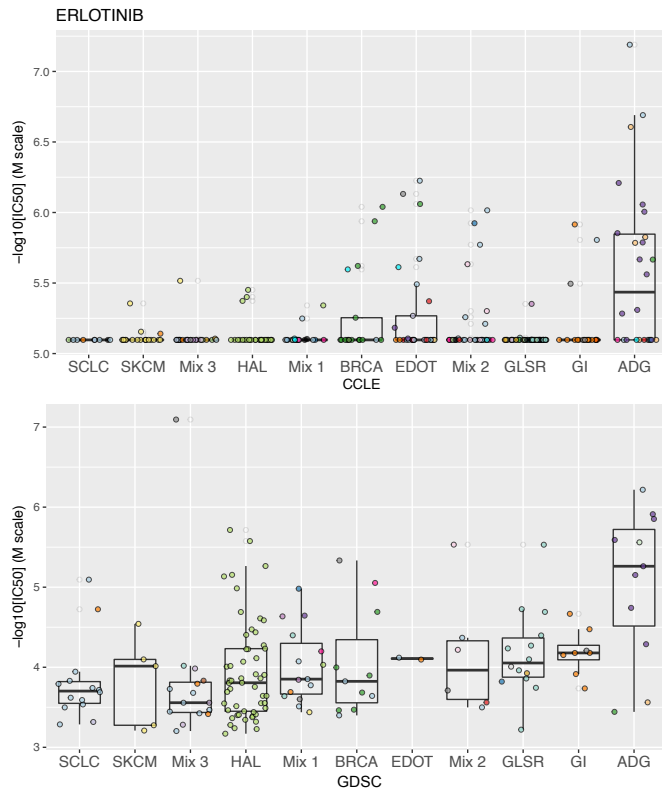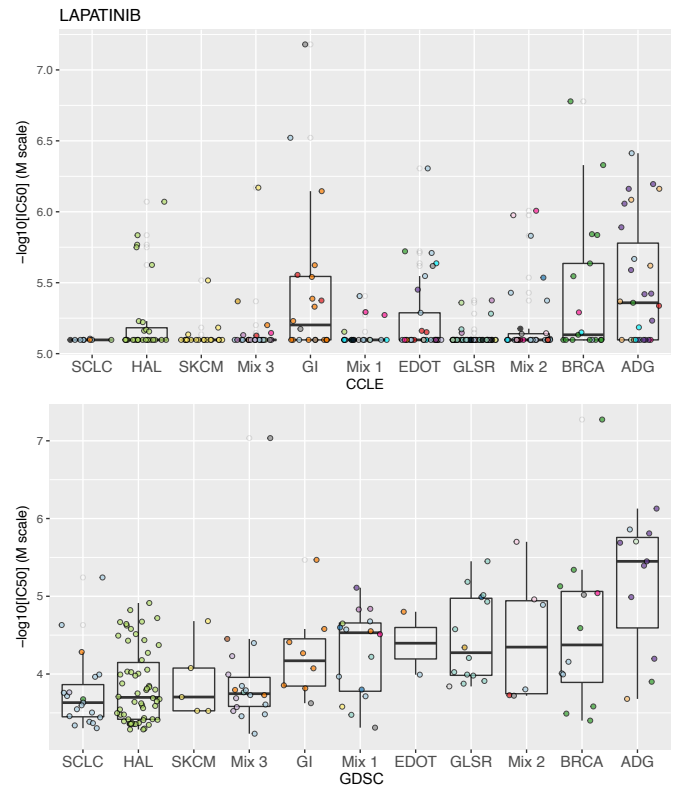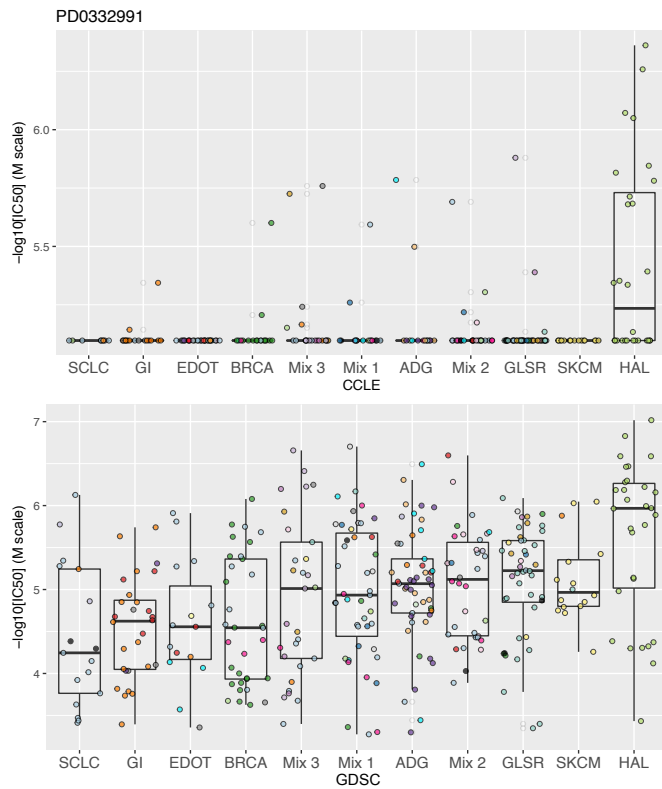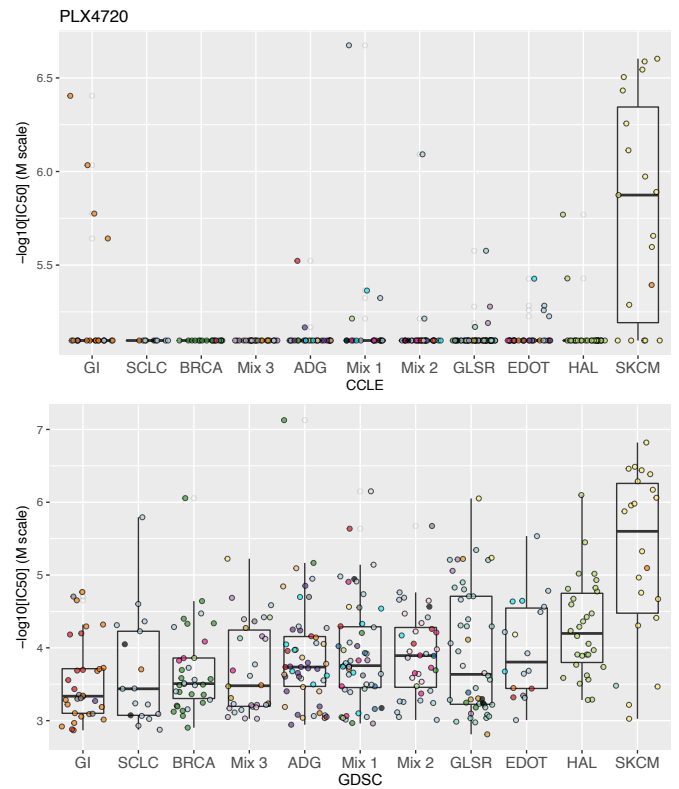

# Supplementary Fig.5 (continue)

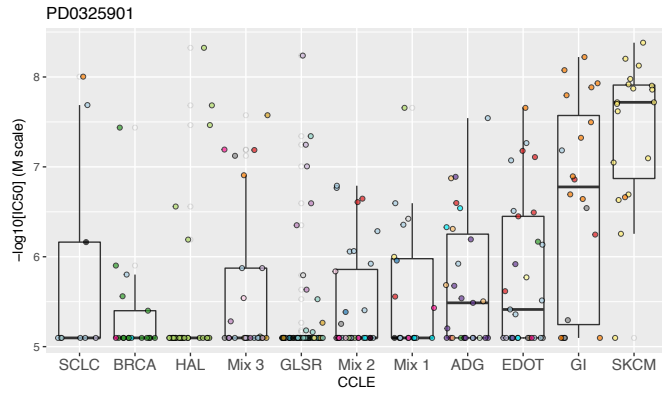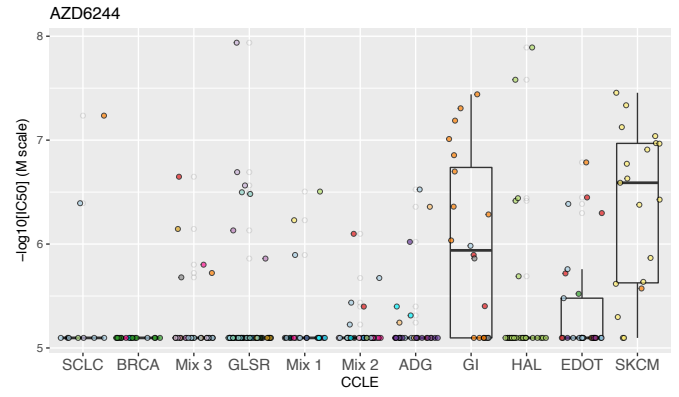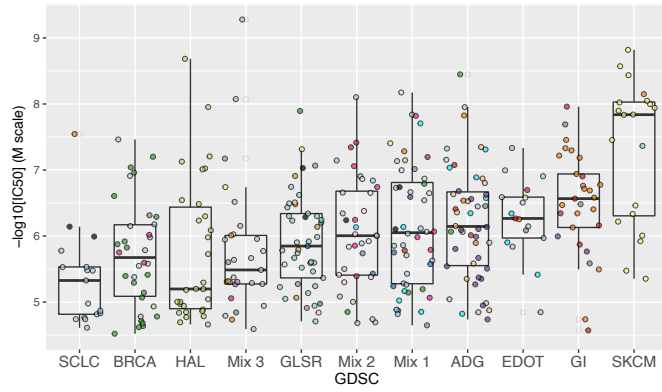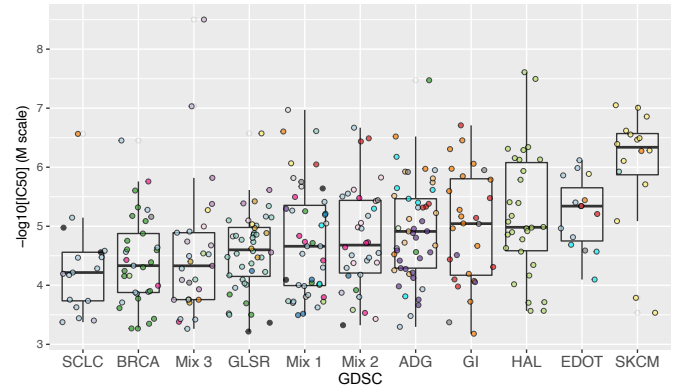

**a**

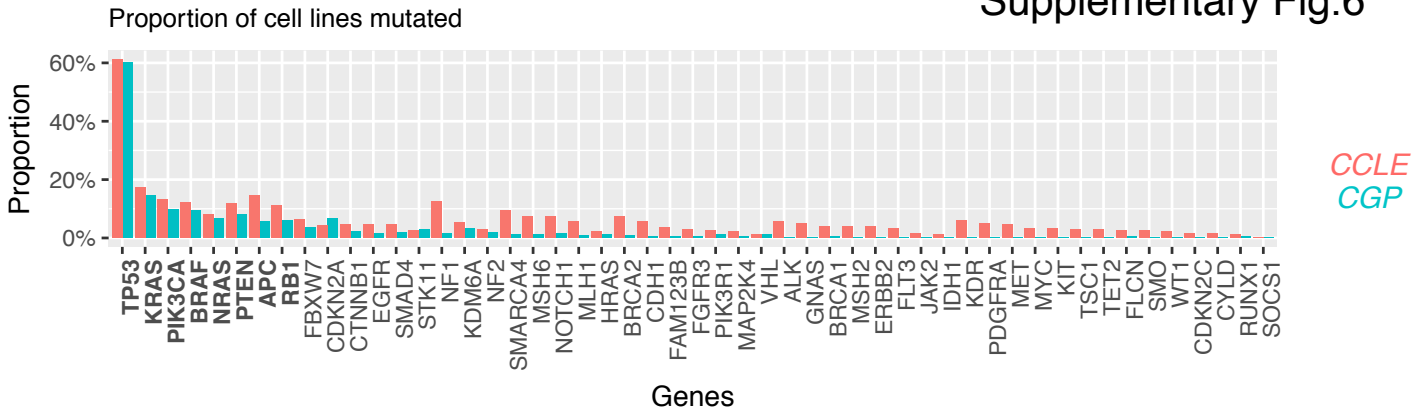

**b**

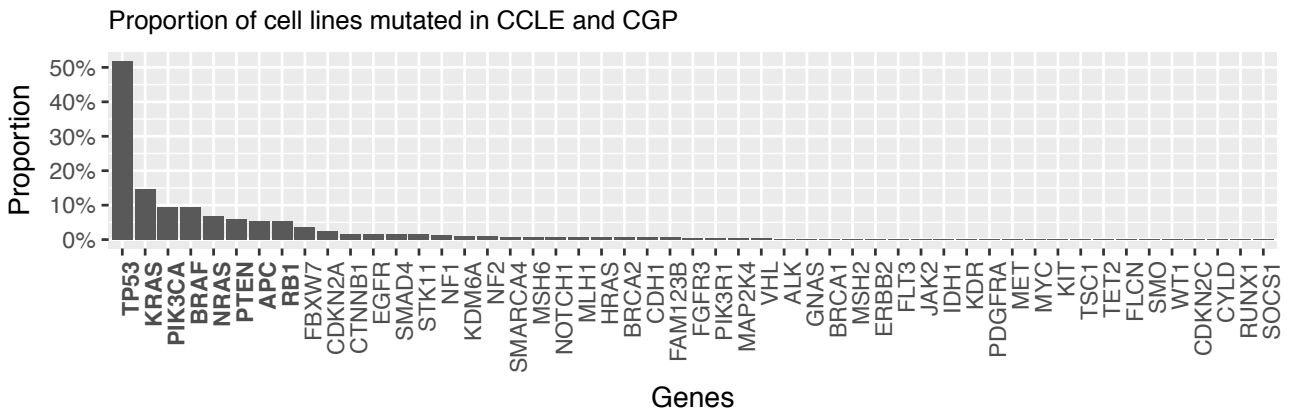

**c**

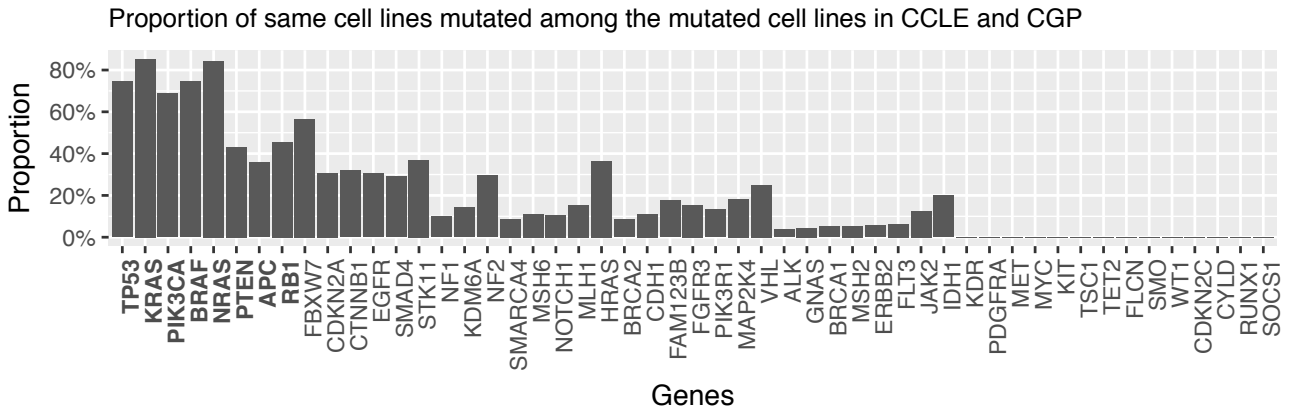

**d**

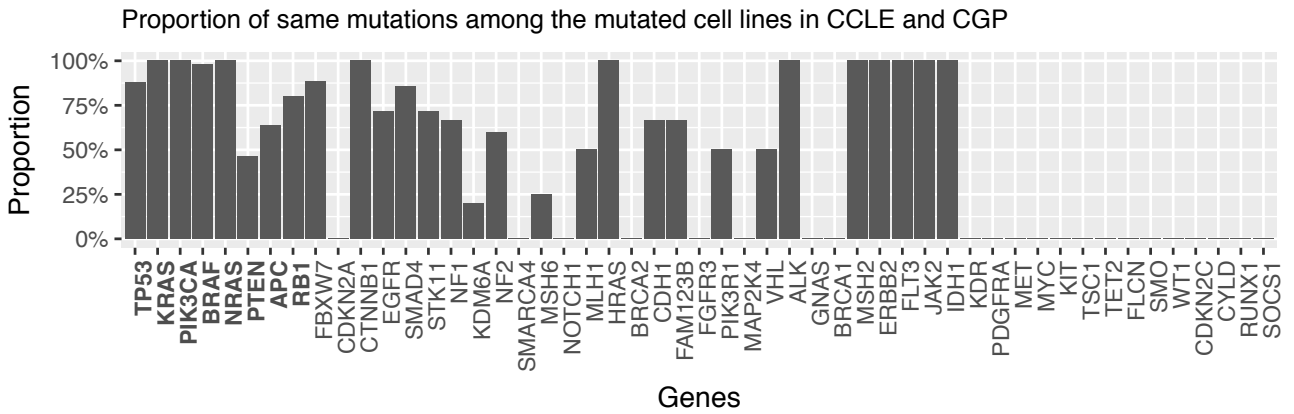



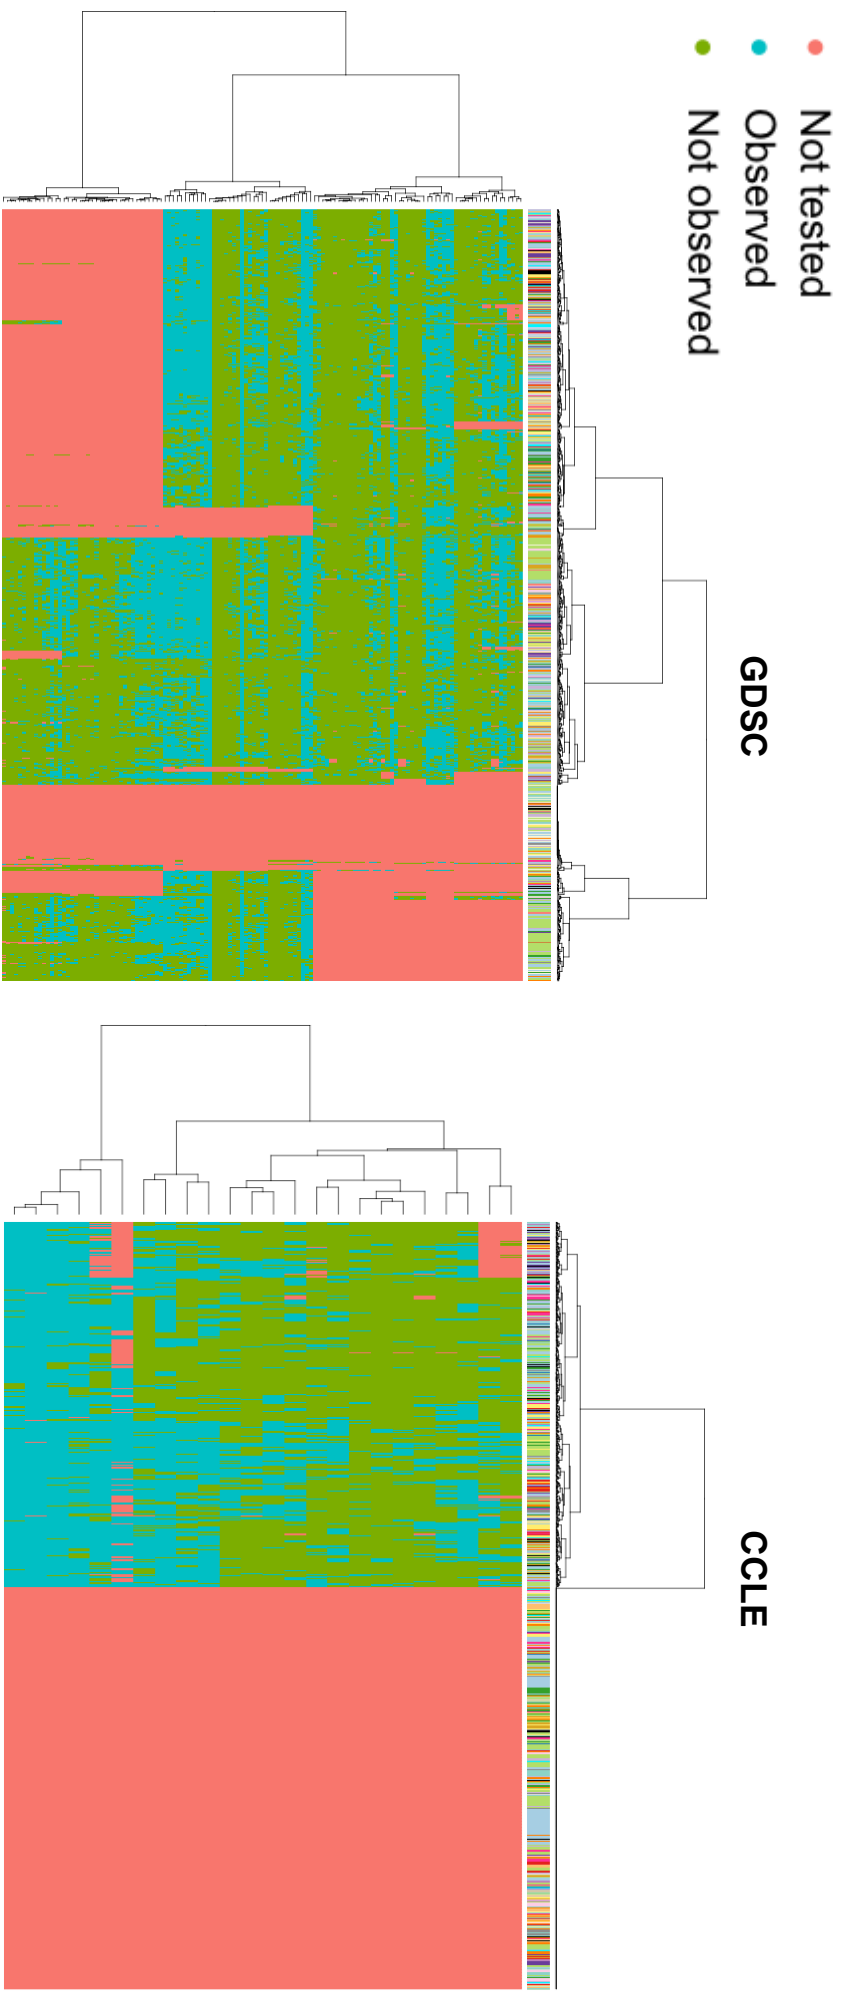

# Supplementary Fig.8

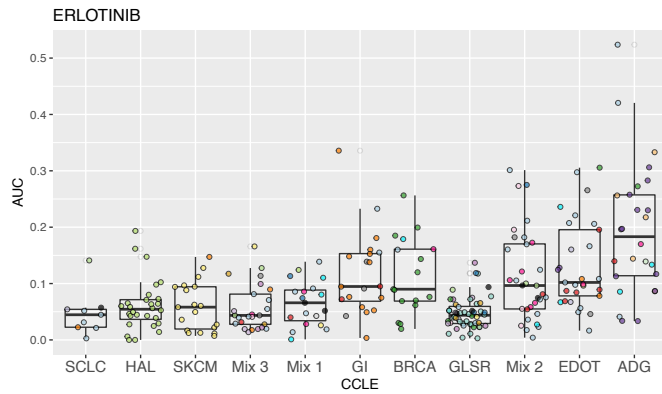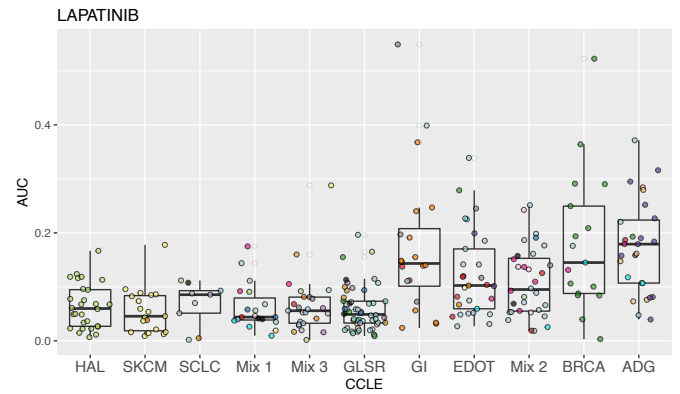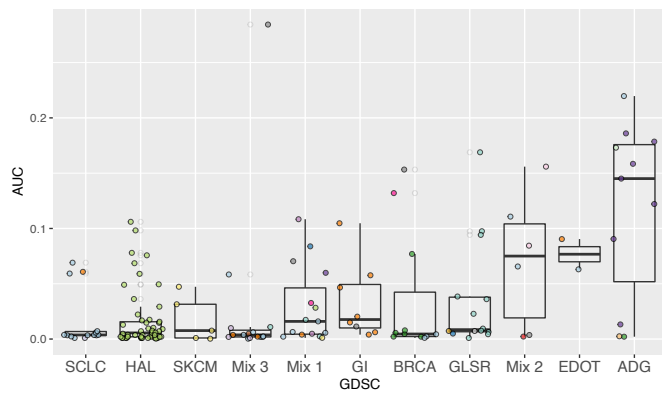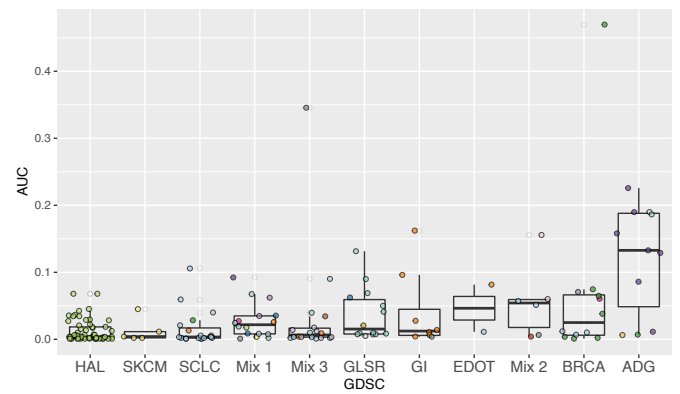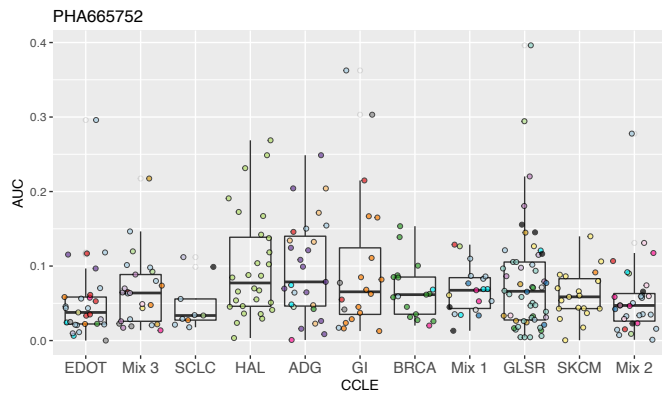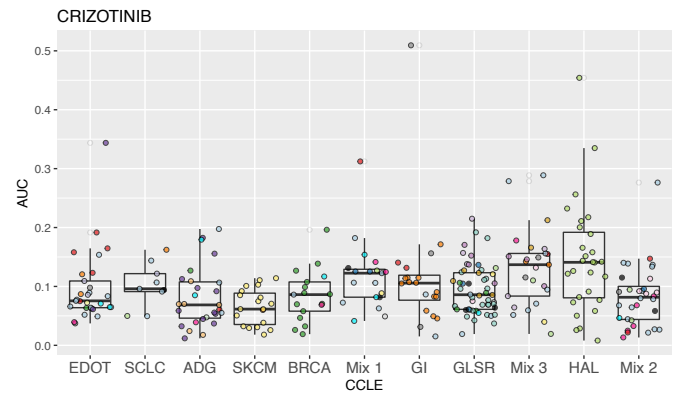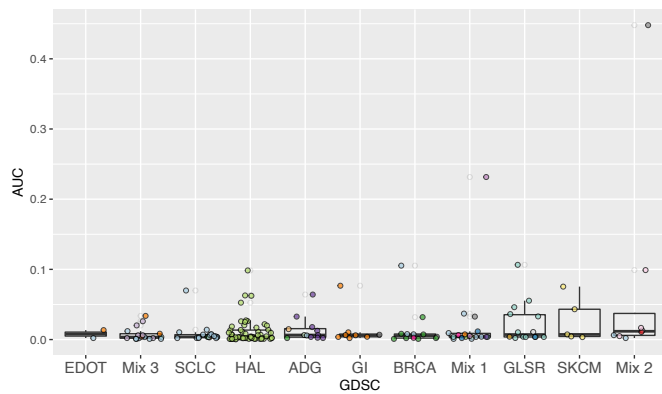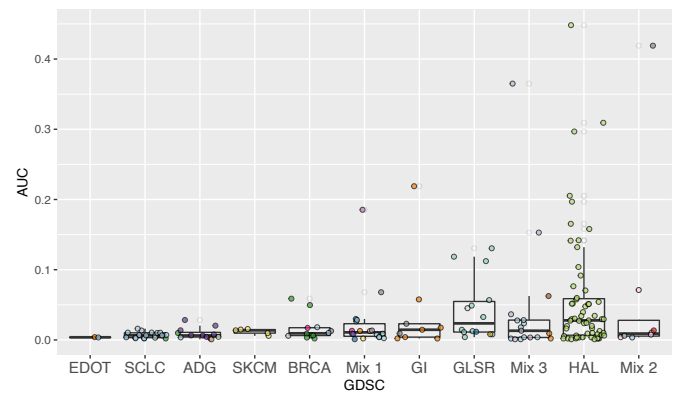

# Supplementary Fig.8 (continue)

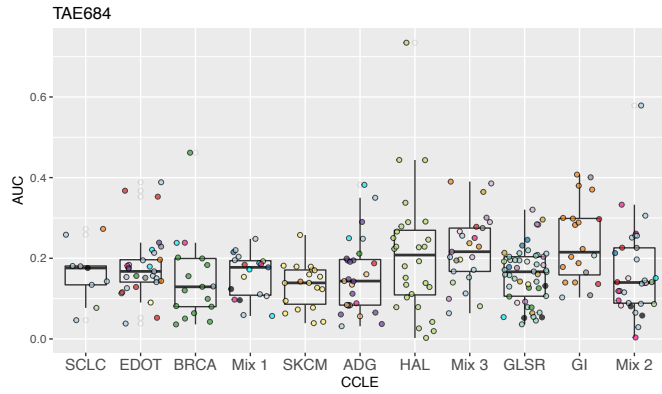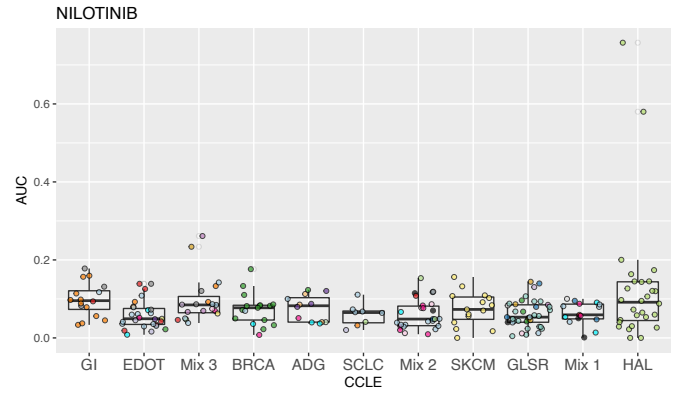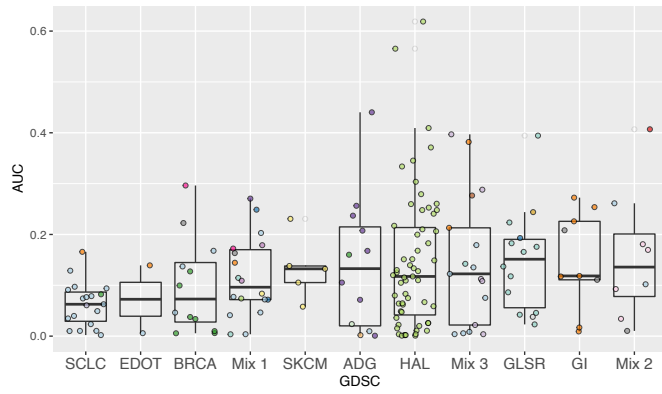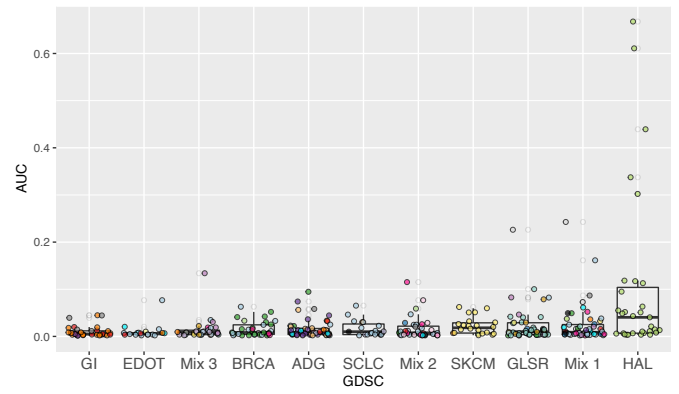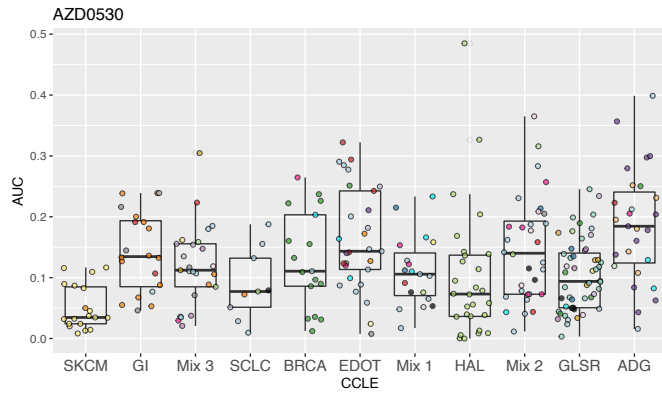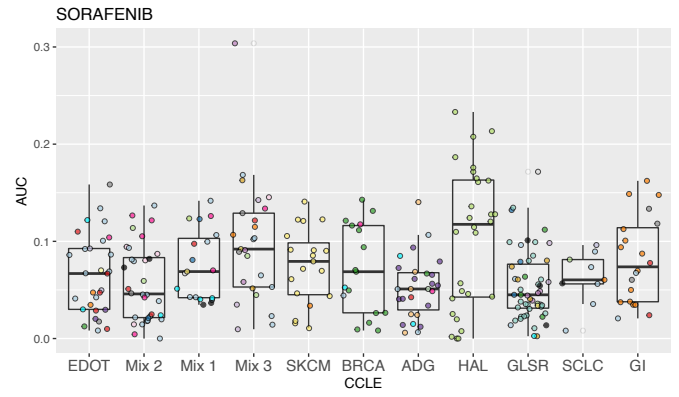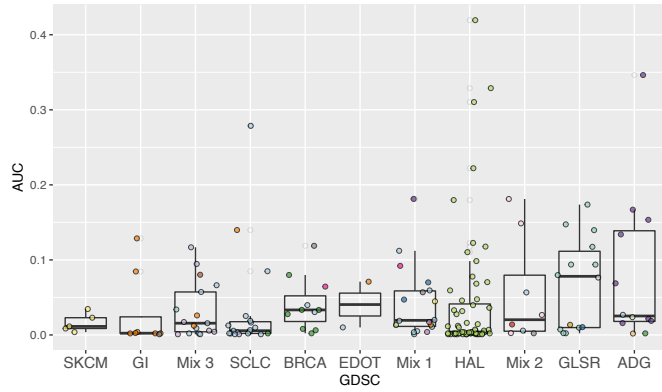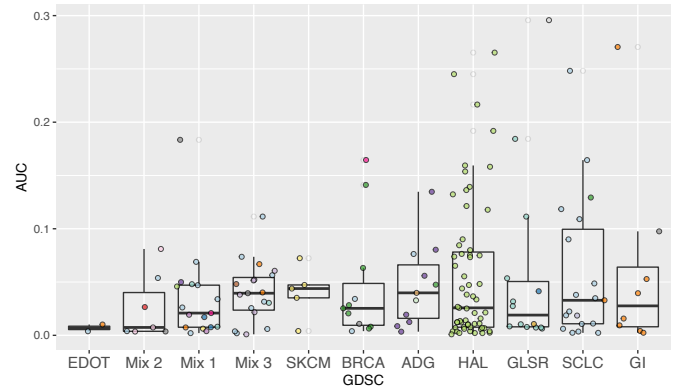

Supplementary Fig.8 (continue)

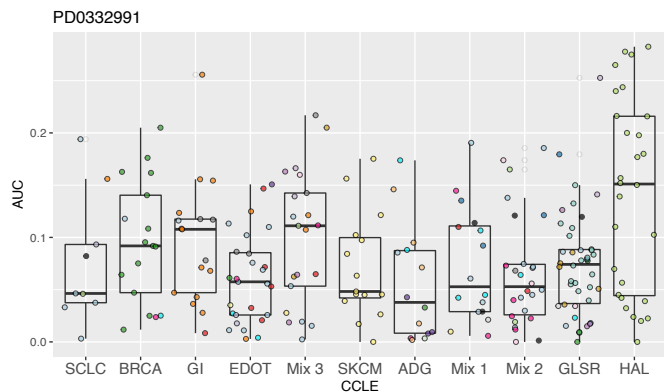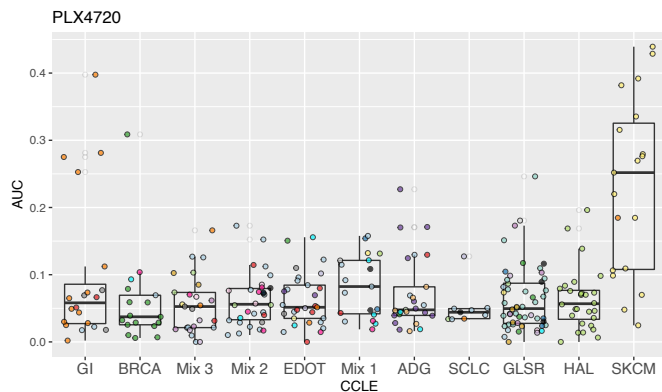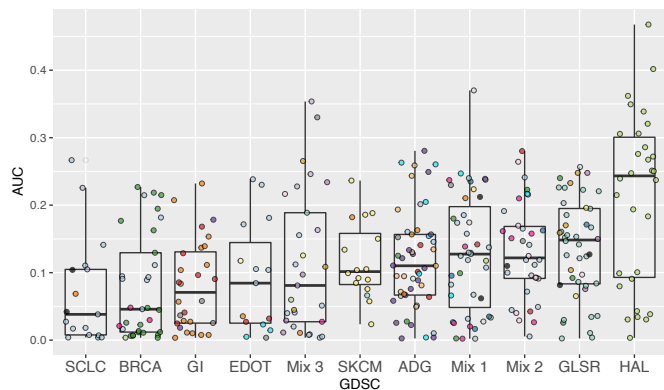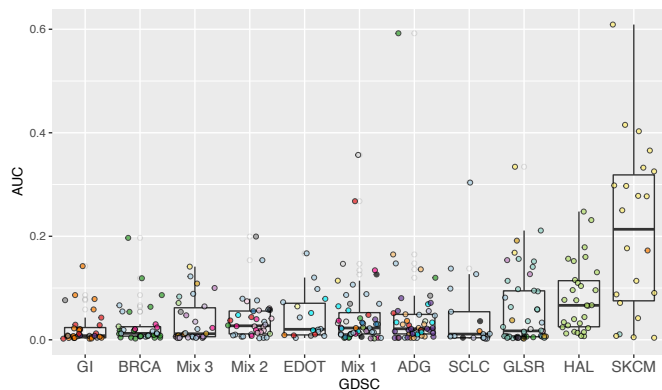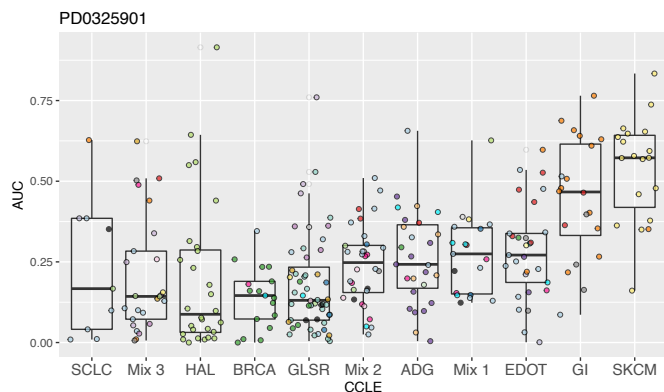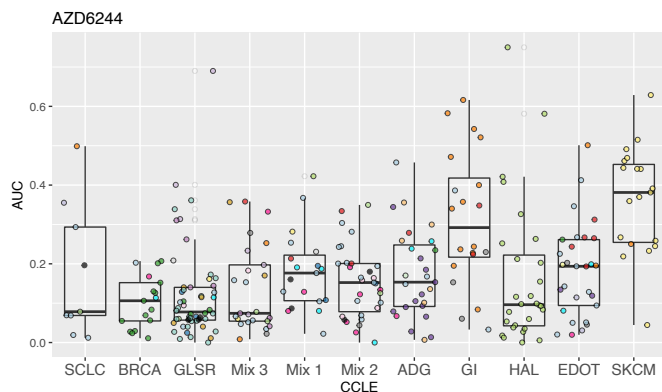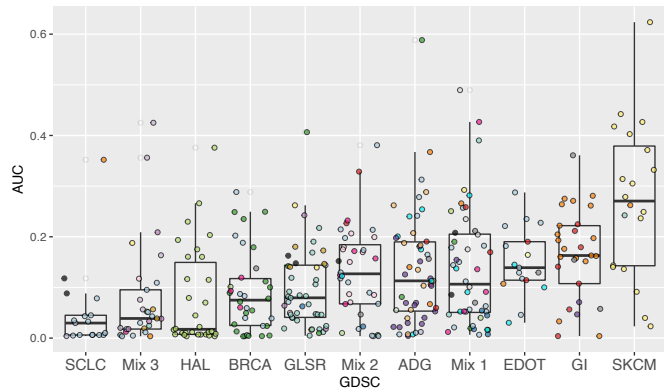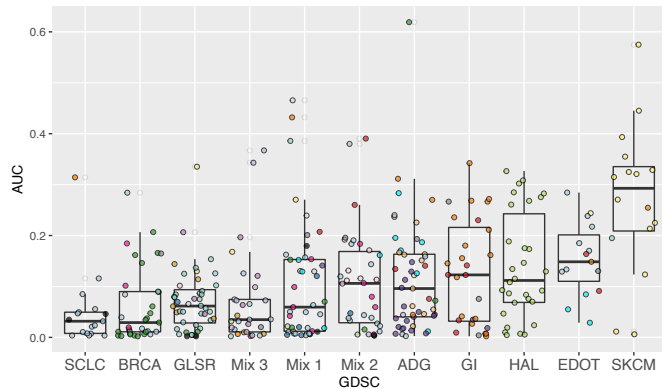

# Supplementary Fig.8 (continue)

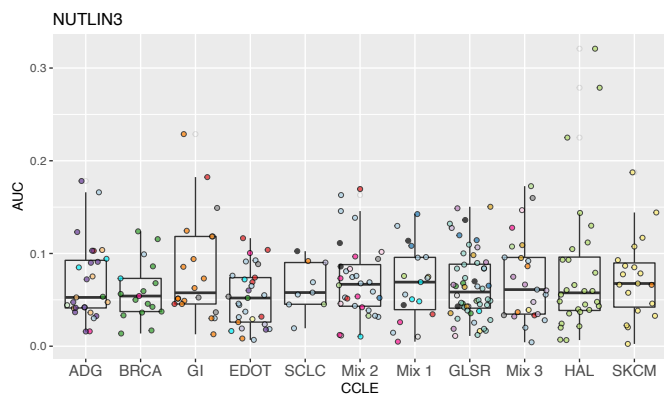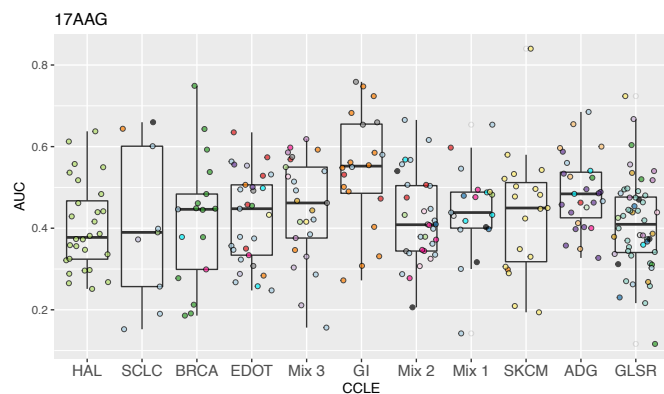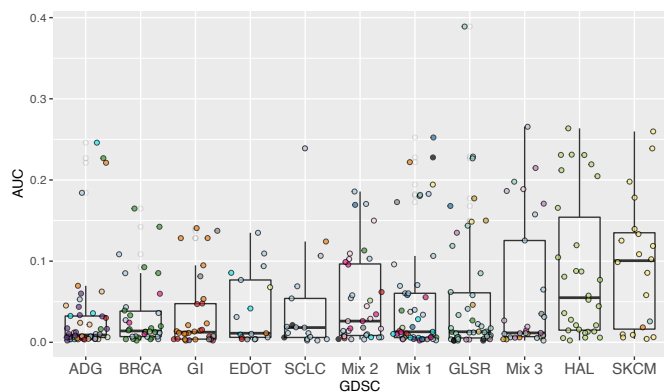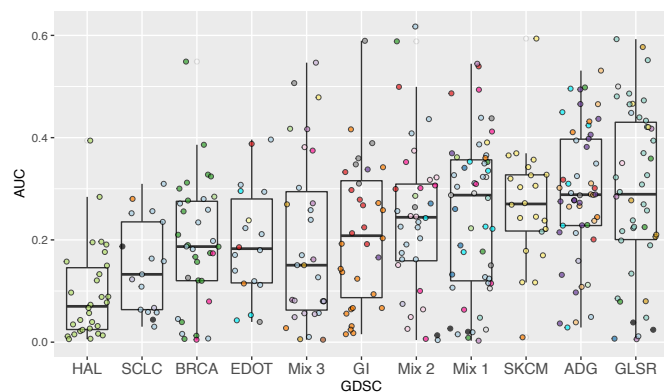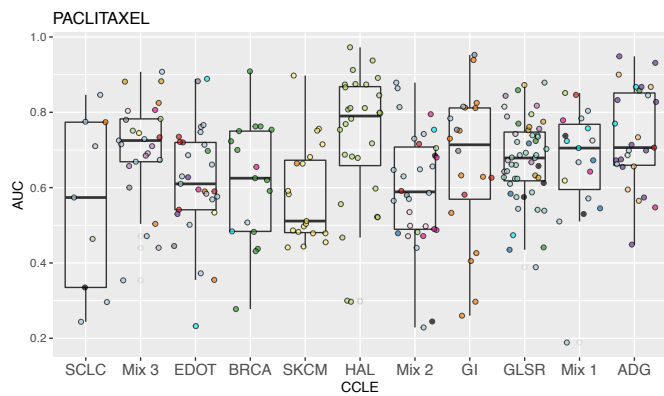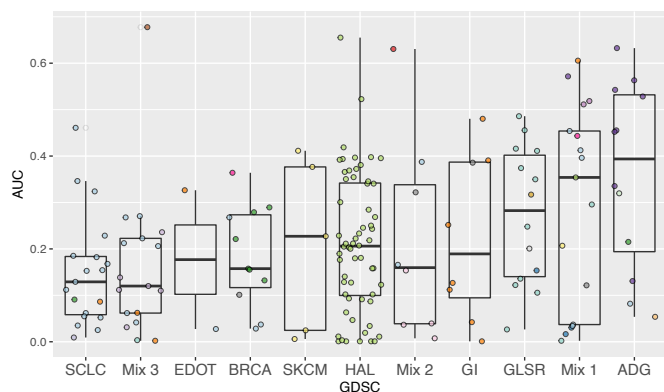

Supplementary Fig.9

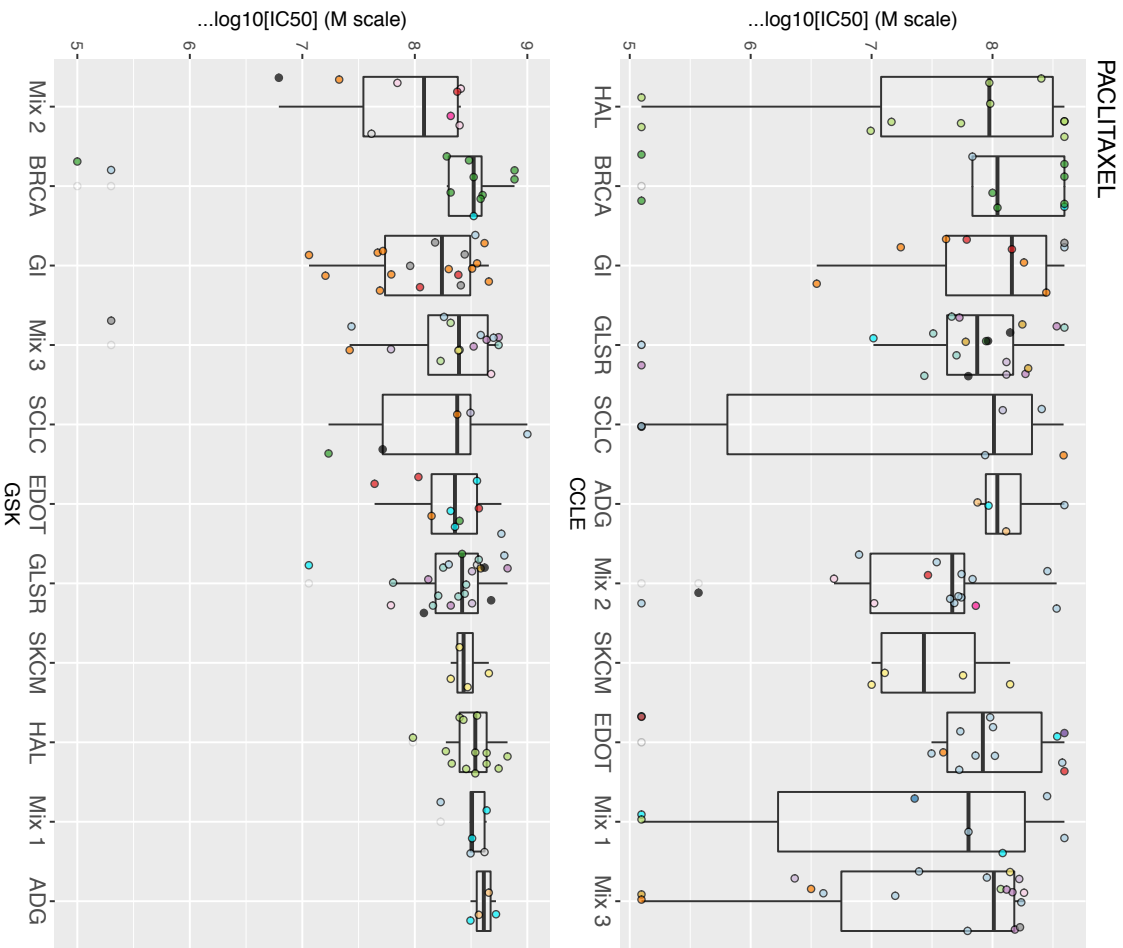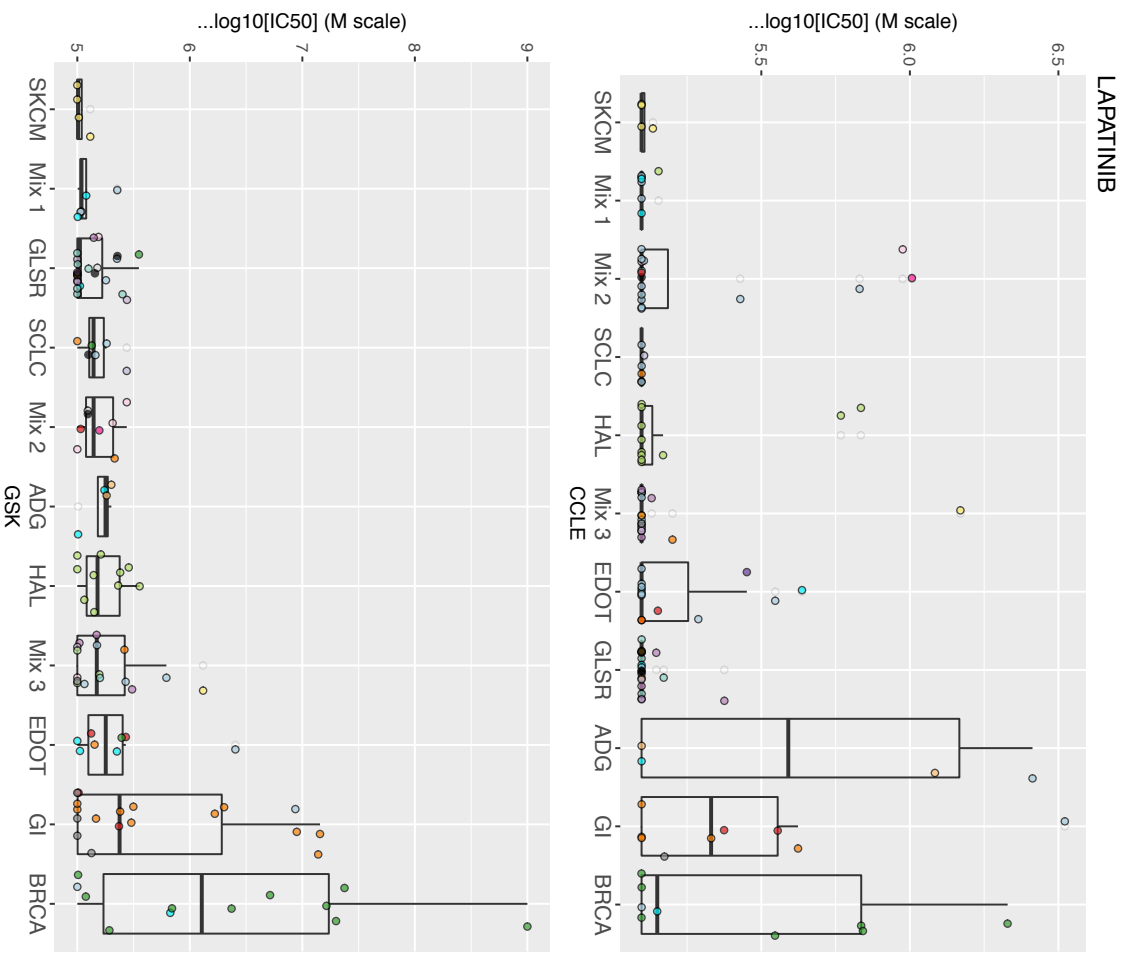

Supplementary Fig. 10

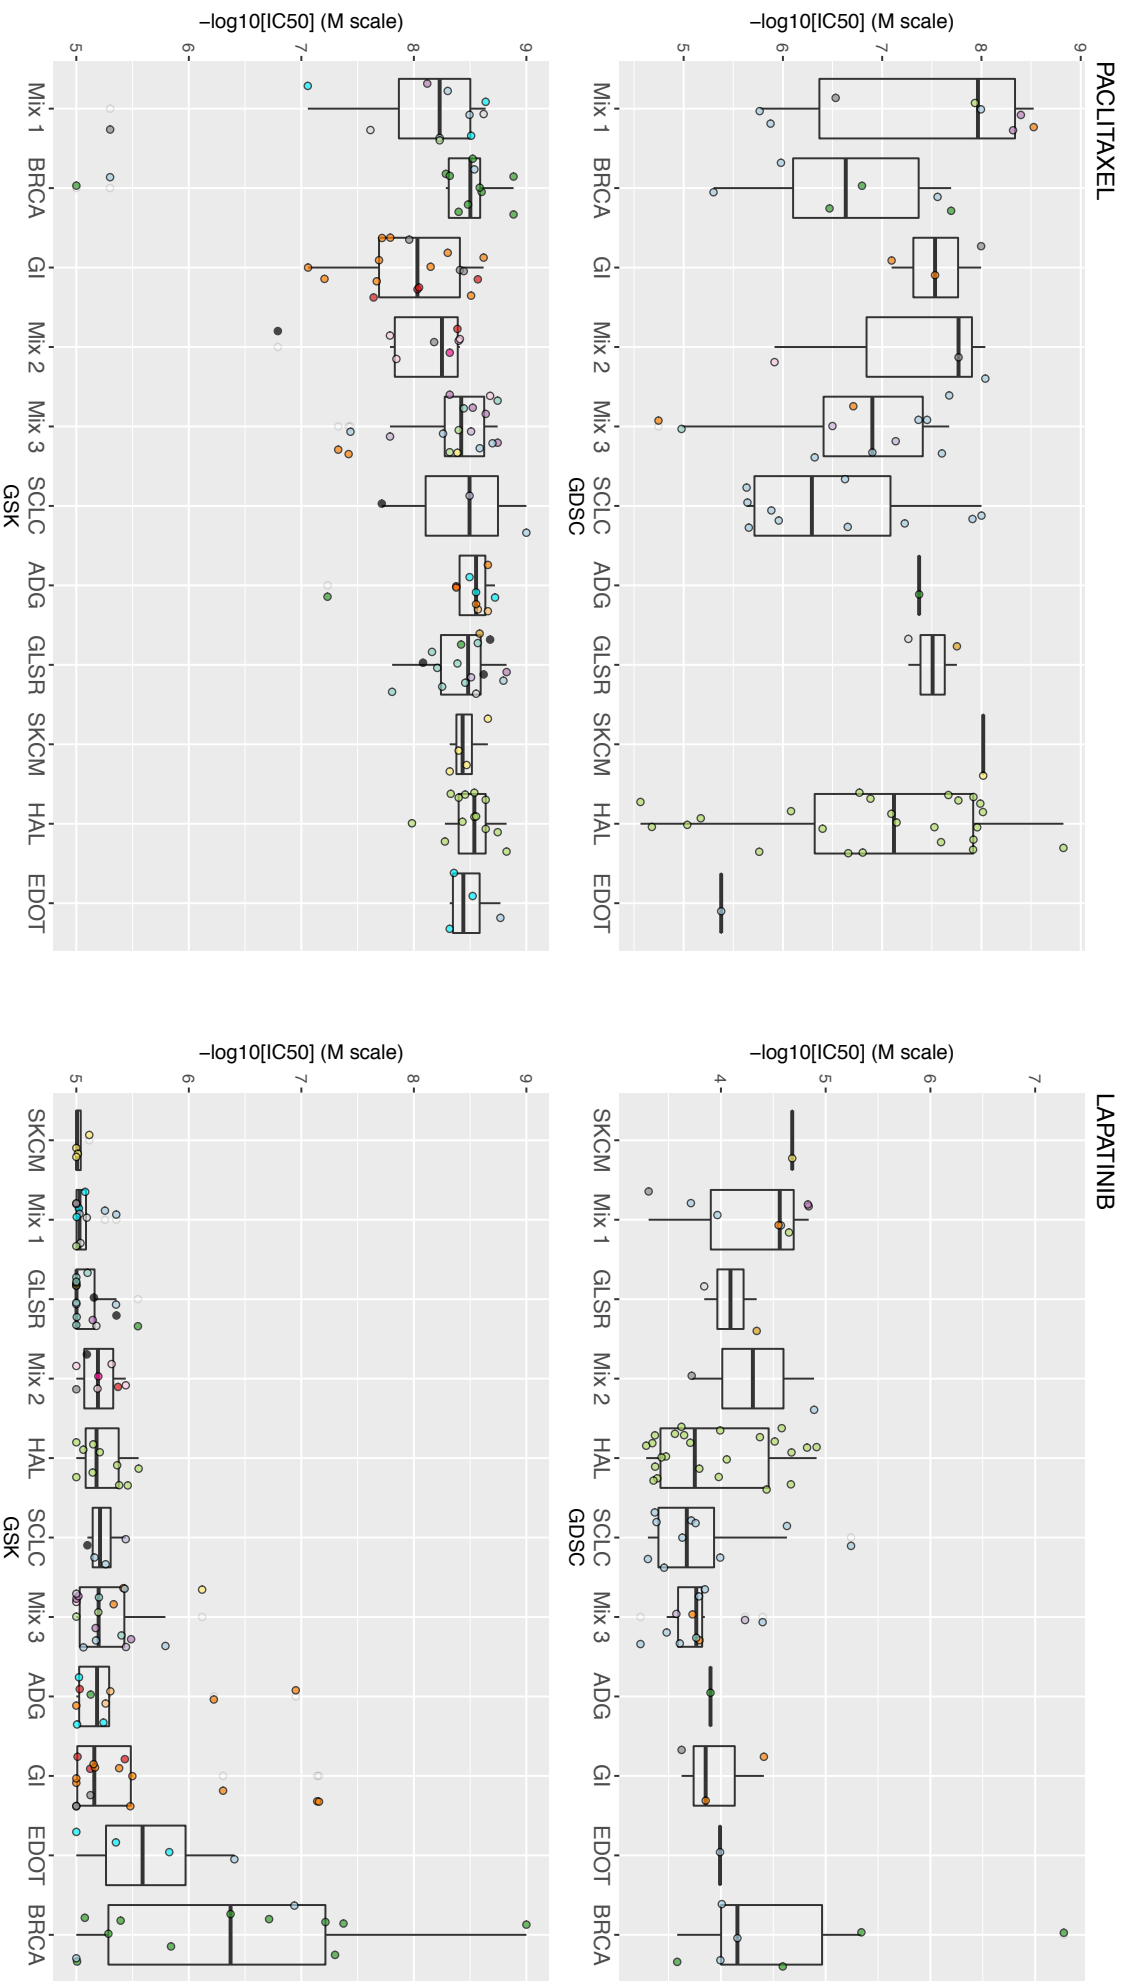

# Supplementary Fig.11

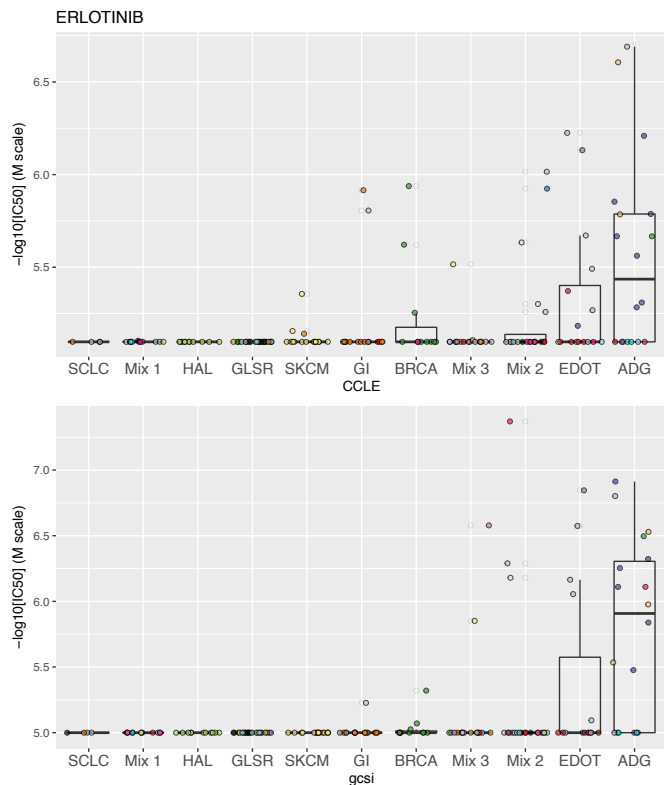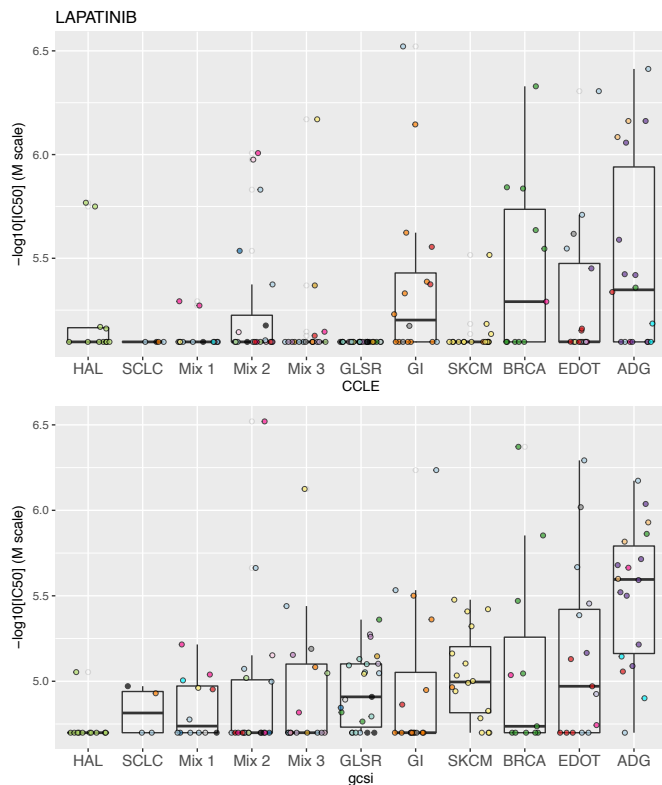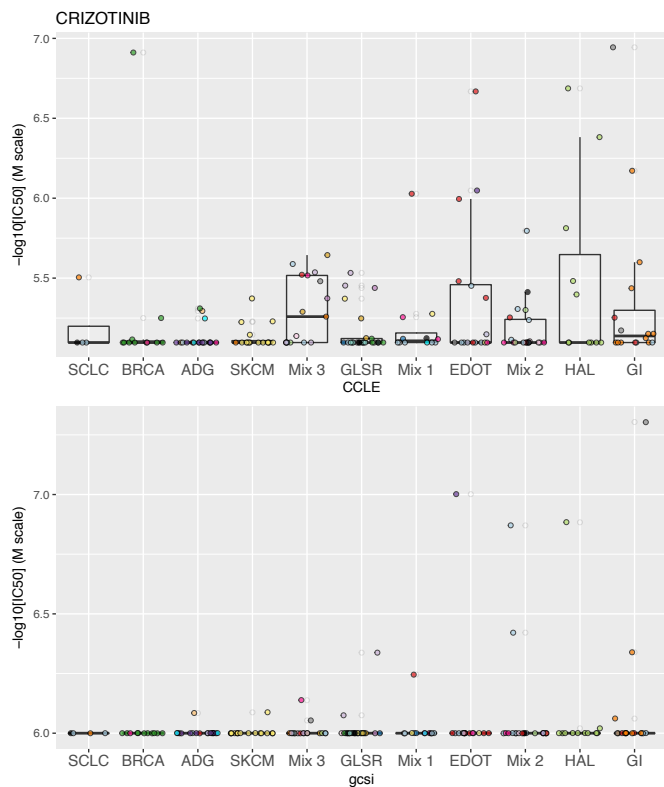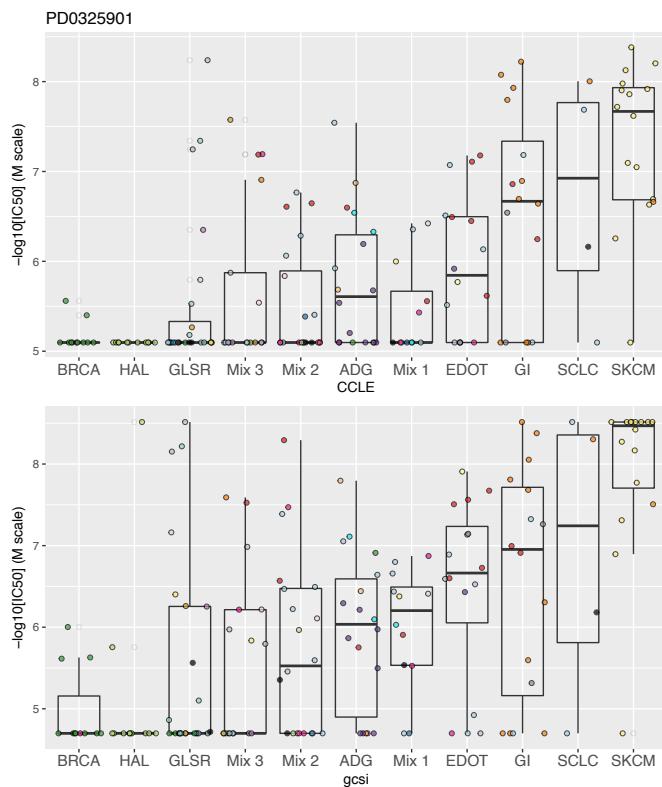



Supplementary Fig.11 (continue)

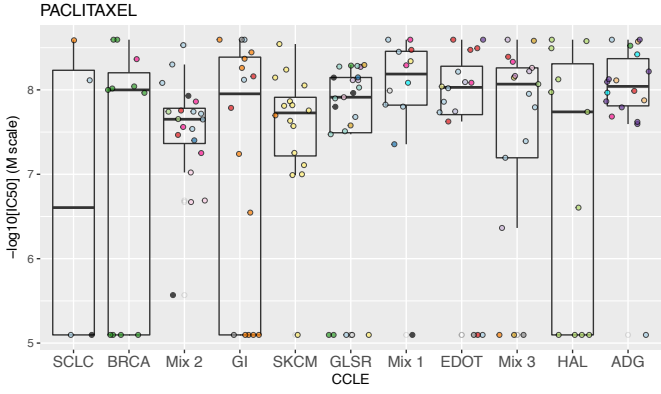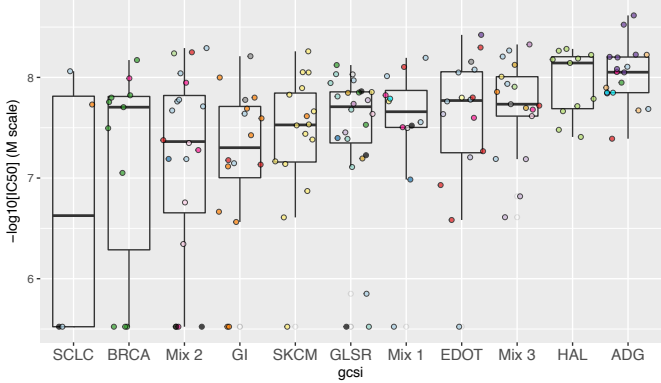

# Supplementary Fig.12

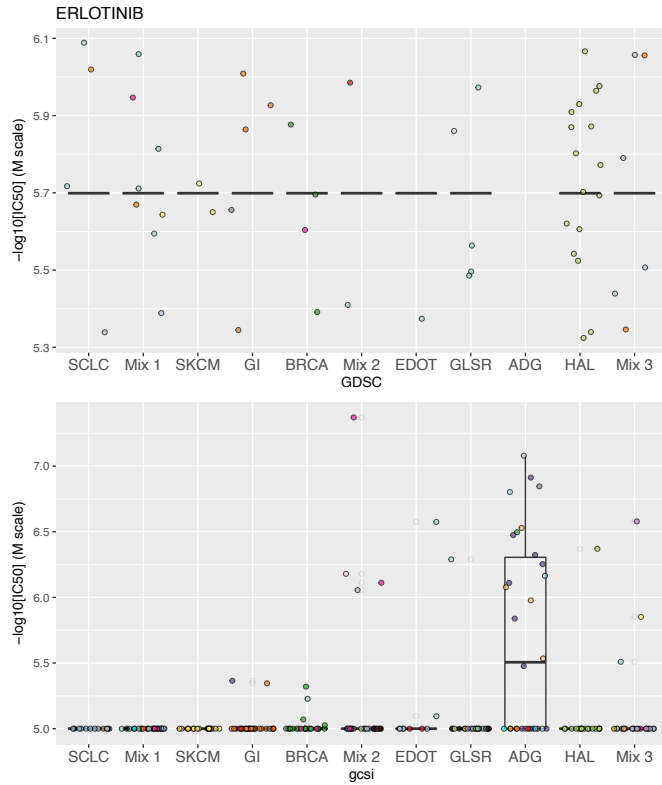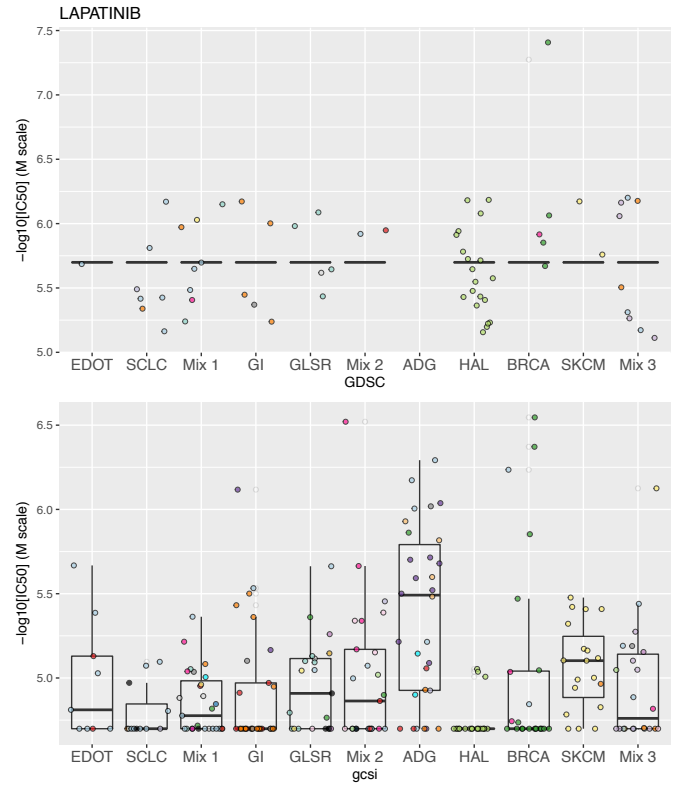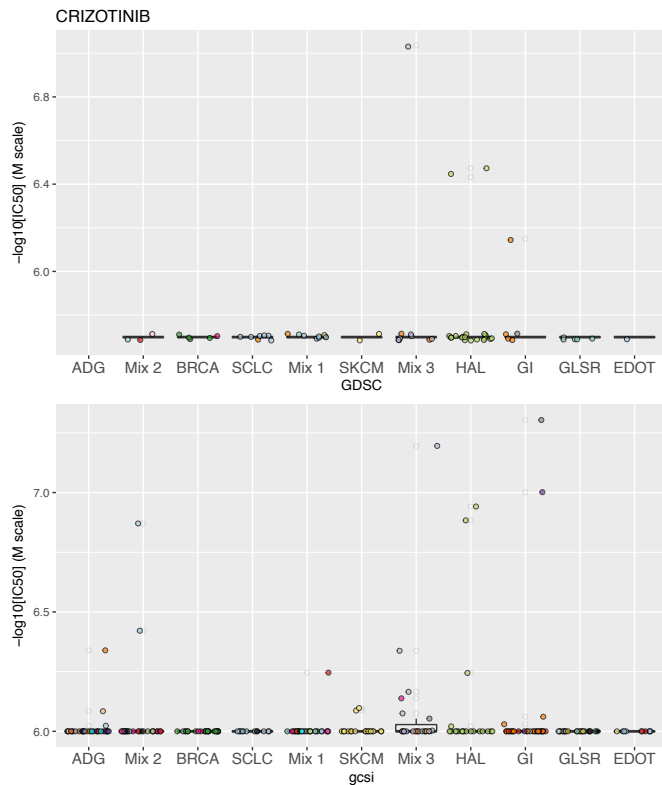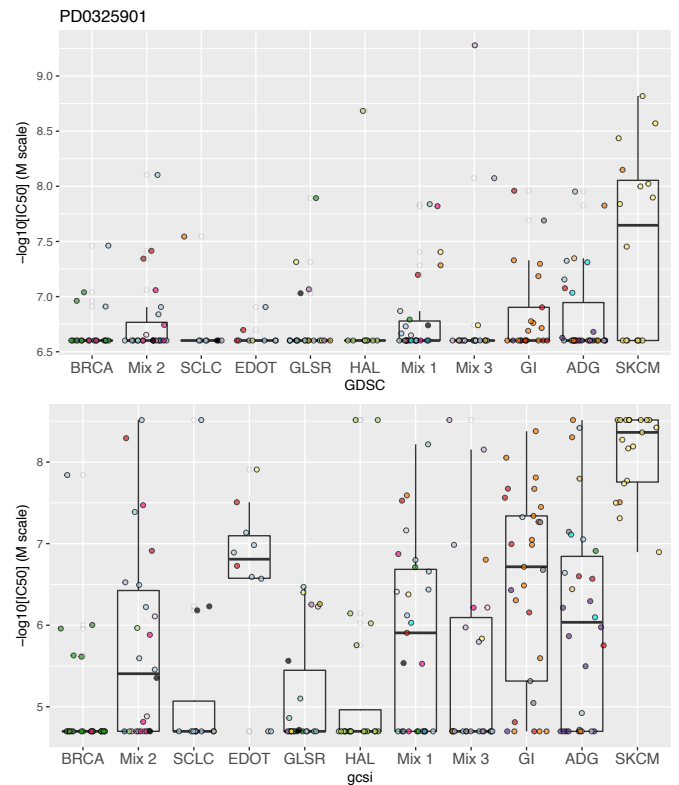

Supplementary Fig.12 (continue)

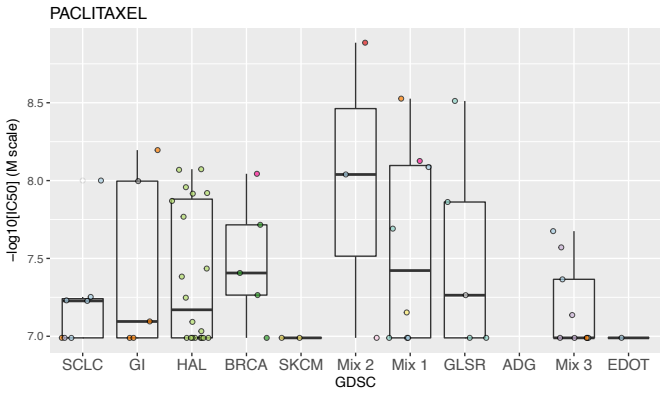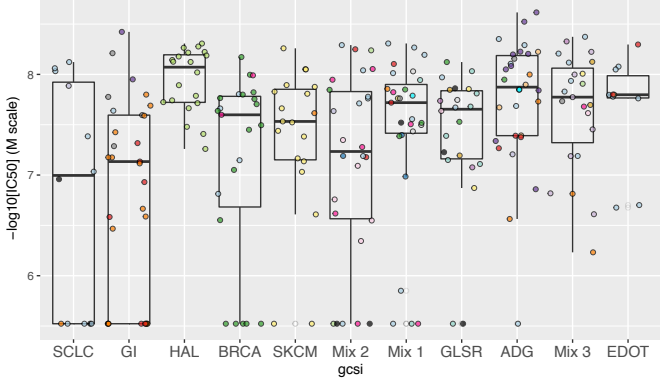

# Supplementary Fig.13

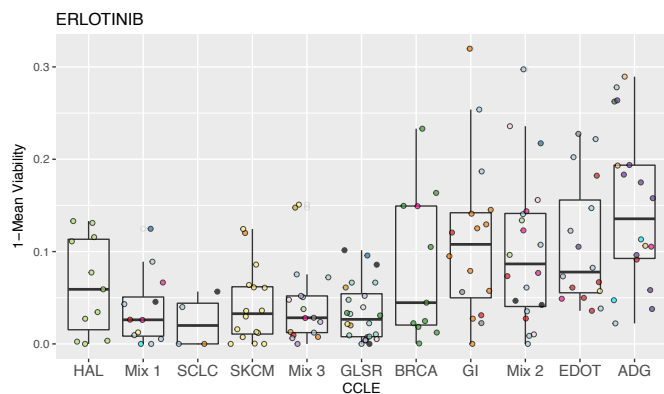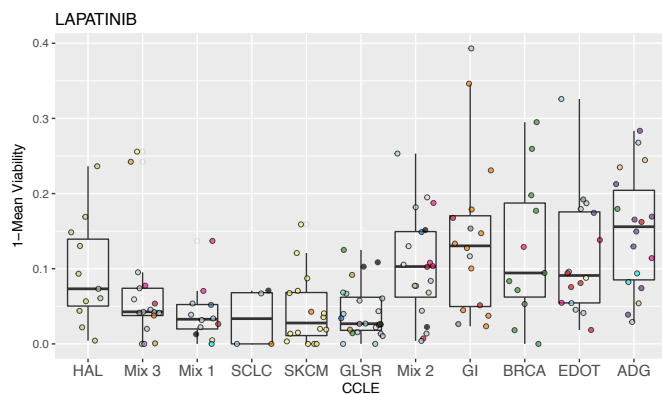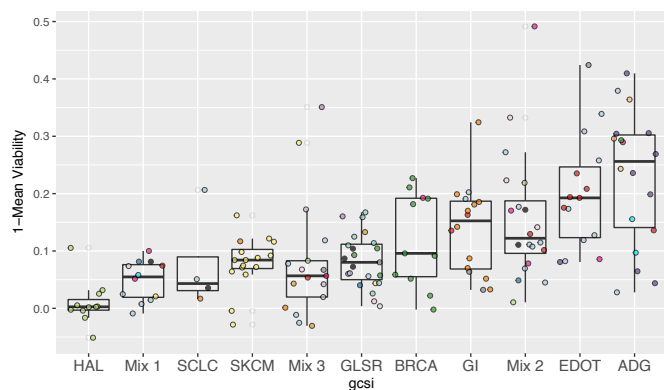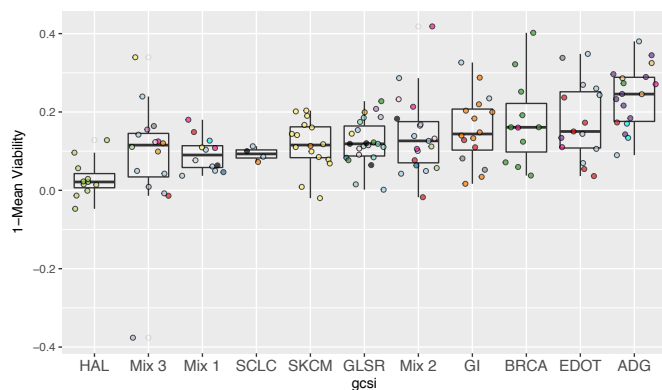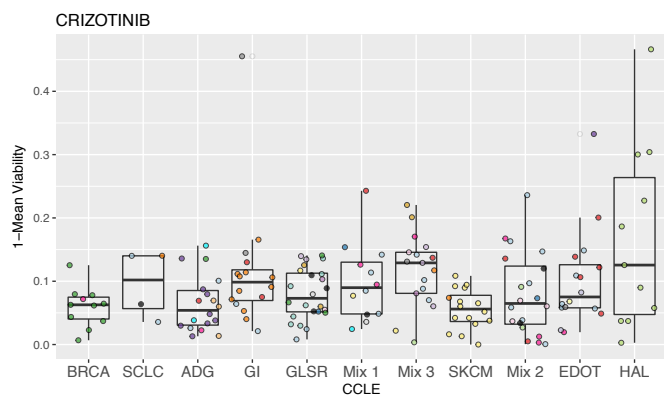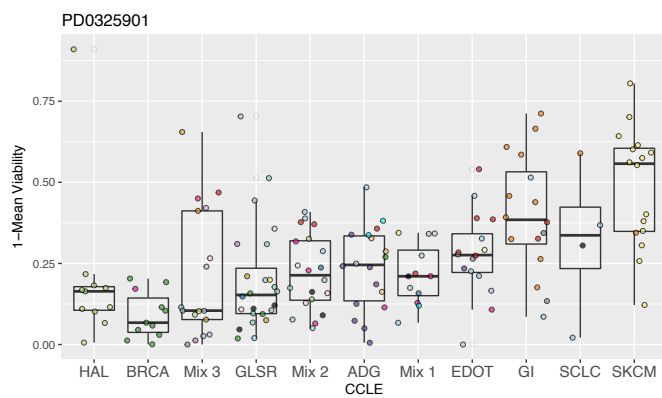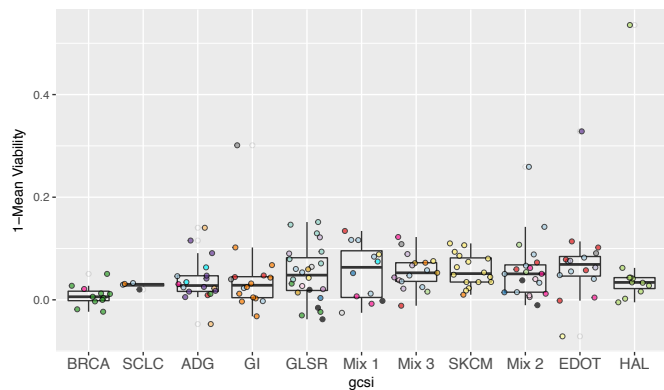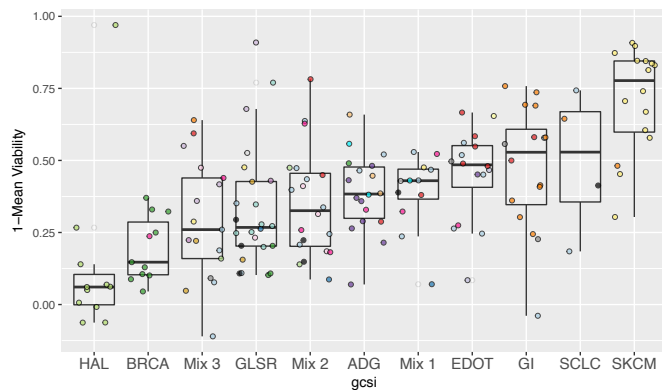

# Supplementary Fig.13 (continue)

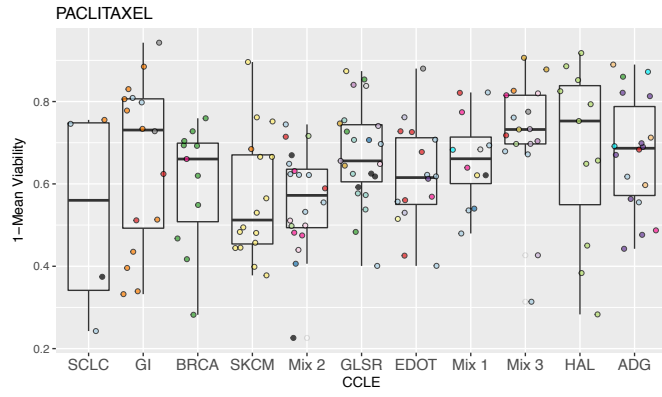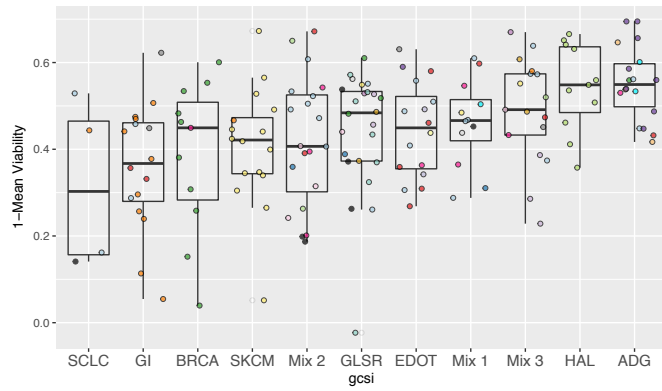

# Supplementary Fig.14

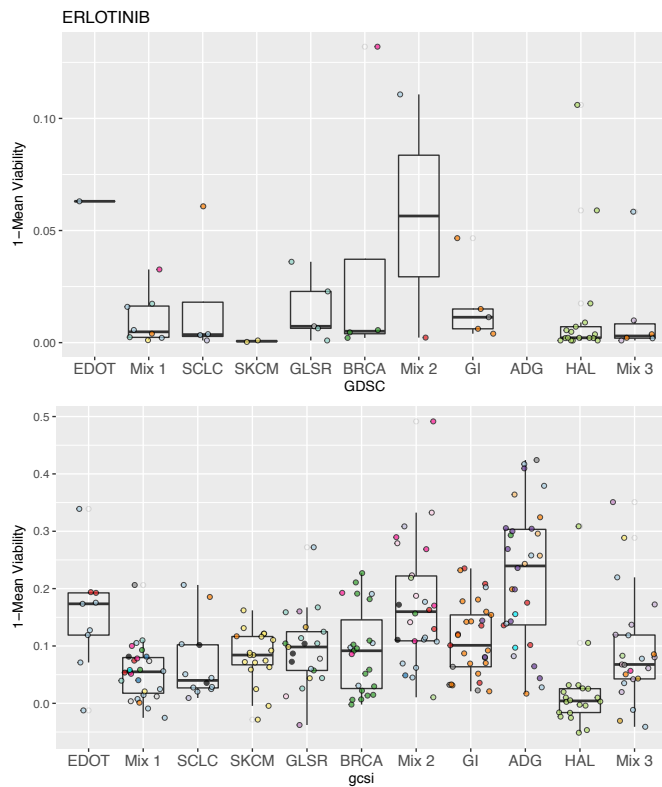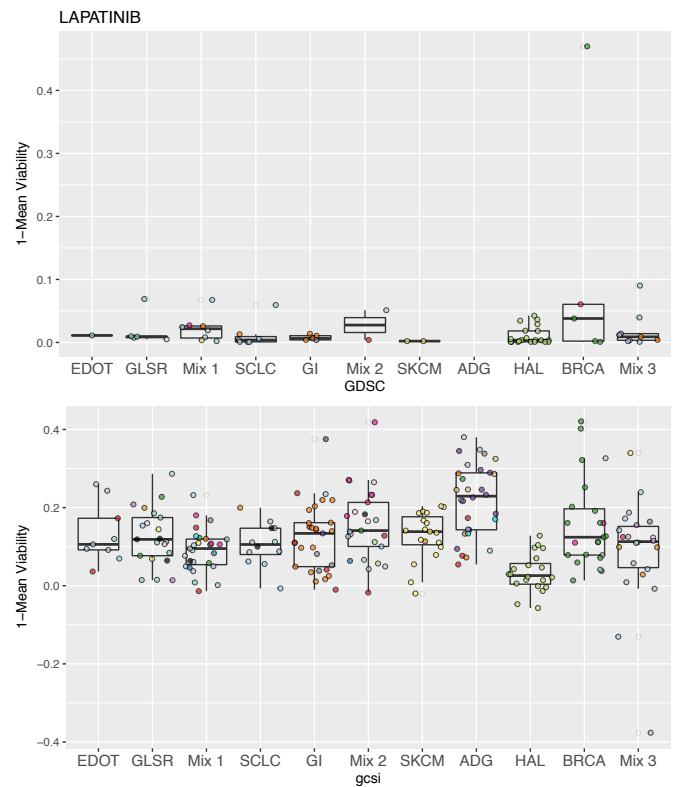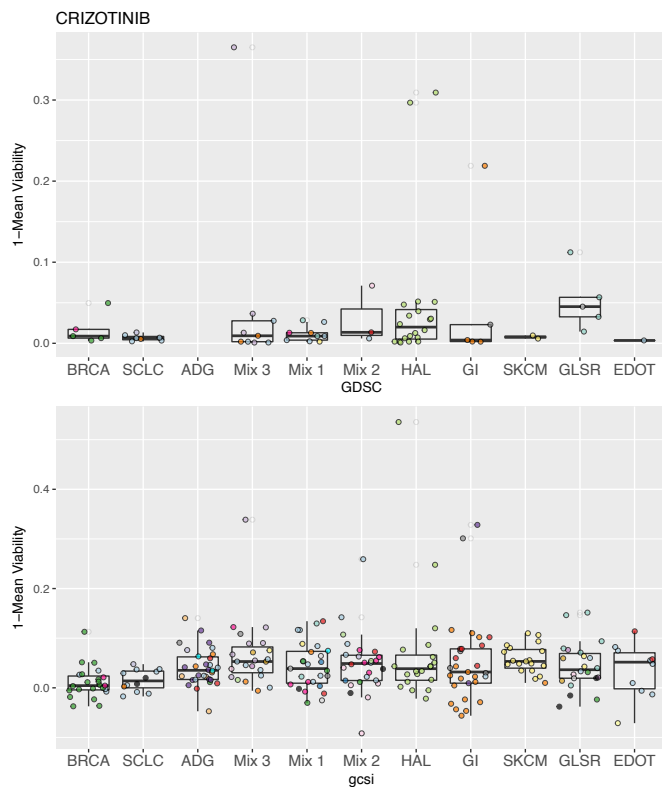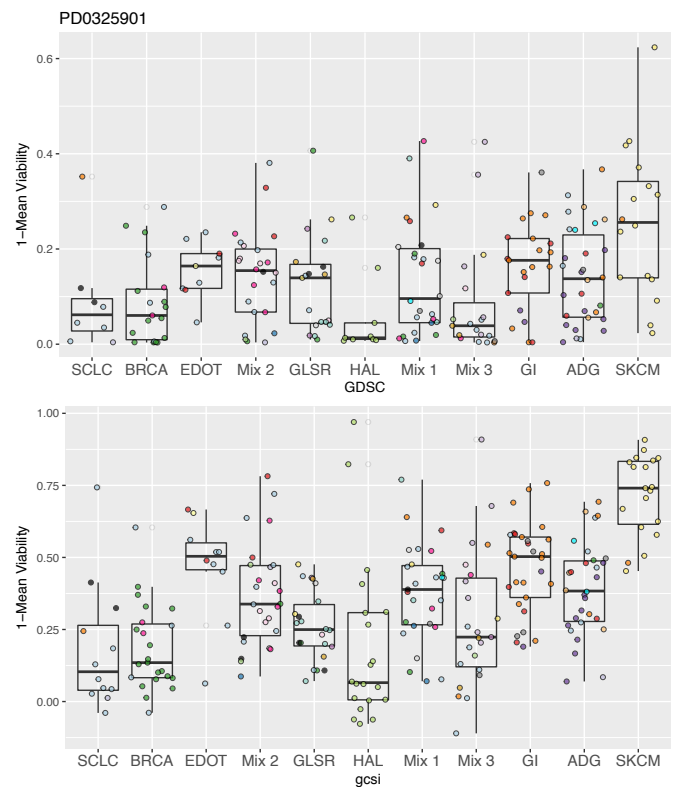

Supplementary Fig.14 (continue)

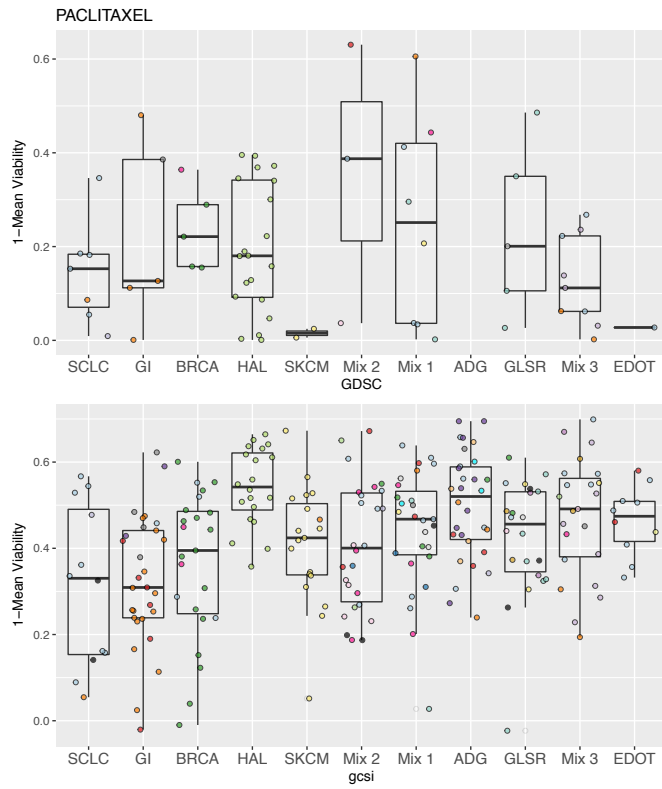

**a**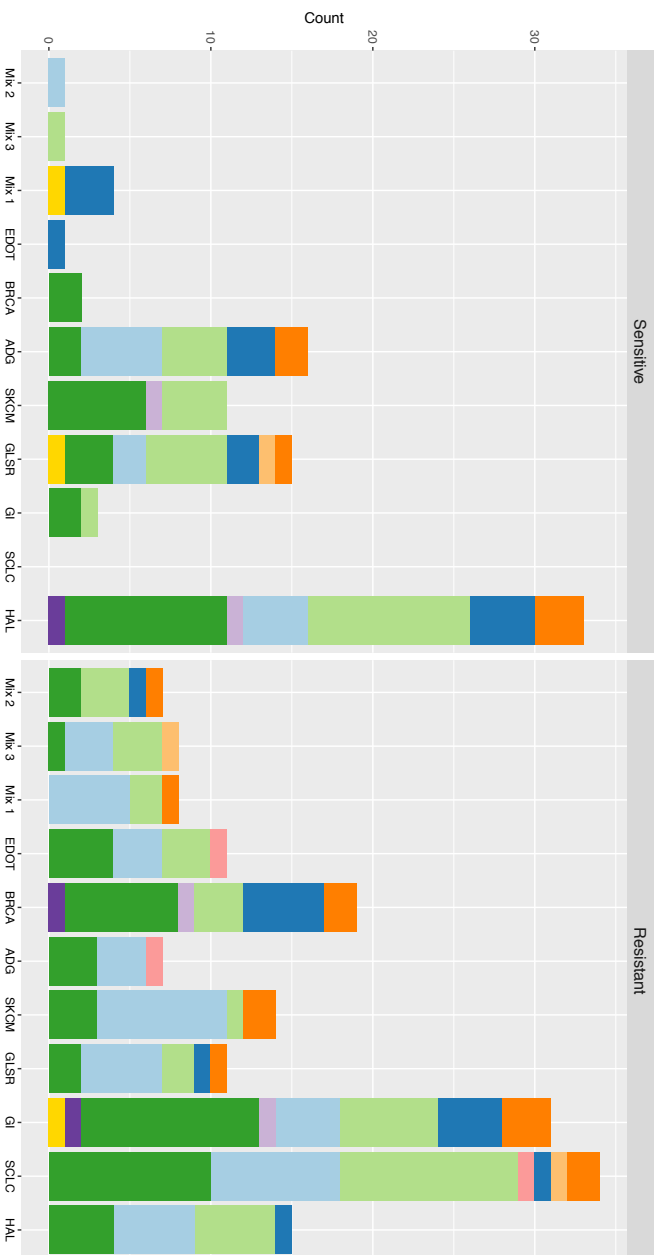**b**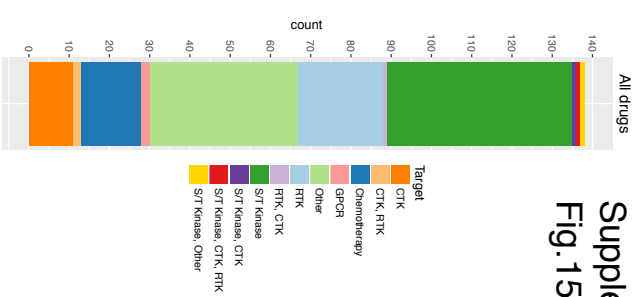

Supplementary  
Fig.15

**c**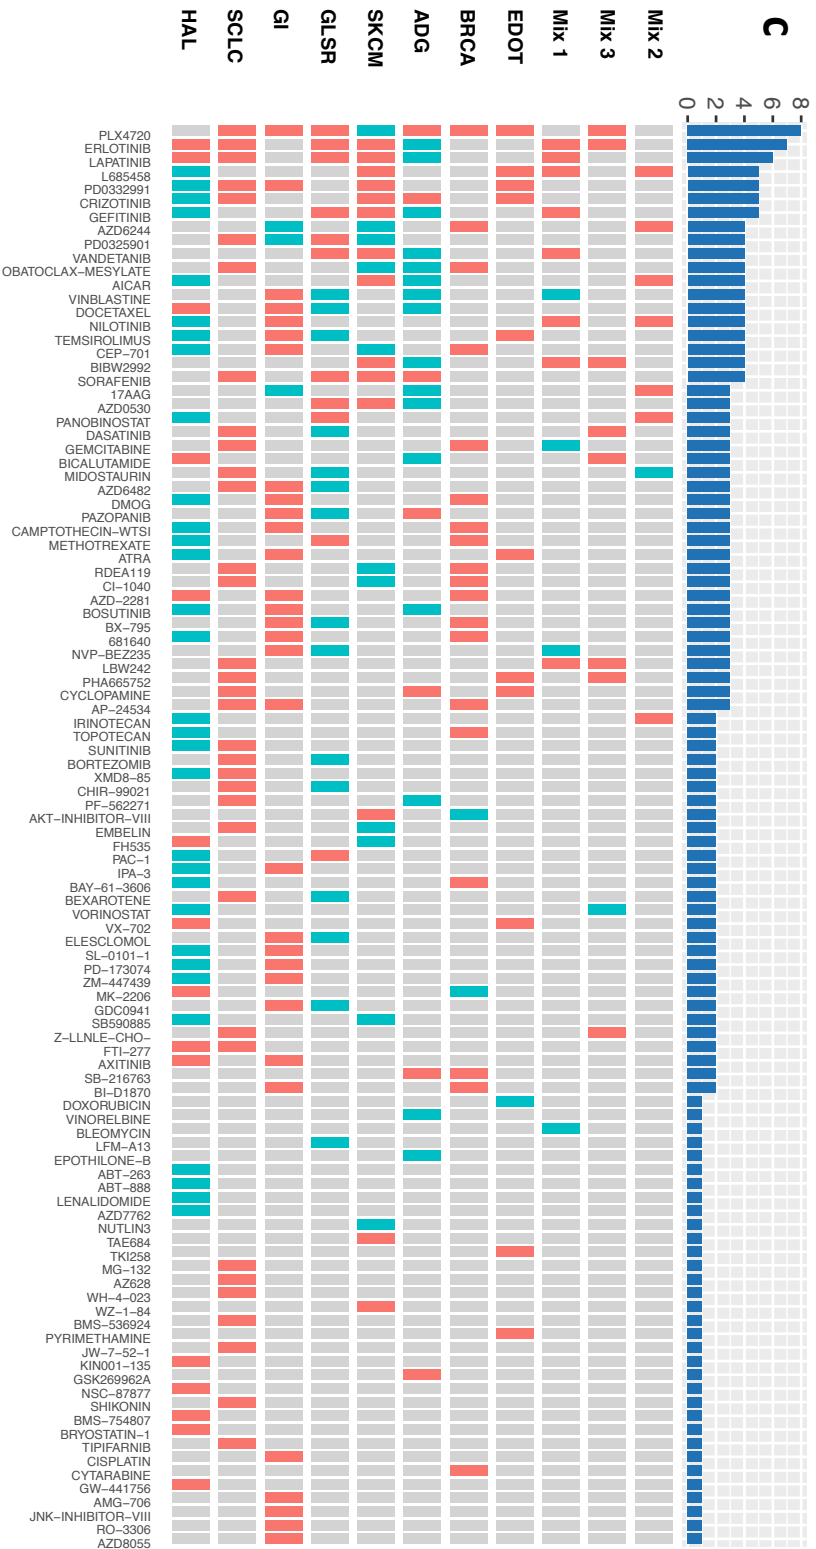

Sensitive  
Resistant

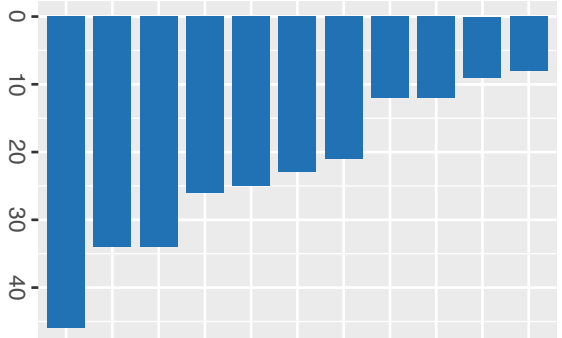



Supplementary Table 1

| <b>SCLC</b>          | <b>TP53</b> | <b>KRAS</b> | <b>PIK3CA</b> | <b>BRAF</b> | <b>NRAS</b> | <b>PTEN</b> | <b>APC</b> | <b>RB1</b> |
|----------------------|-------------|-------------|---------------|-------------|-------------|-------------|------------|------------|
| Proportion in %      | 84          | 8           | 14            | 5           | 8           | 5           | 24         | 41         |
| Fisher p-value       | 0,00443     | 0,957       | 0,662         | 0,978       | 0,492       | 0,864       | 0,174      | 0,000307   |
| FDR-adjusted p-value | 0,0297      | 1           | 1             | 1           | 0,983       | 1           | 0,959      | 0,00338    |
| <b>GI</b>            | <b>TP53</b> | <b>KRAS</b> | <b>PIK3CA</b> | <b>BRAF</b> | <b>NRAS</b> | <b>PTEN</b> | <b>APC</b> | <b>RB1</b> |
| Proportion in %      | 60          | 57          | 31            | 23          | 0           | 9           | 63         | 0          |
| Fisher p-value       | 0,736       | 1,72E-07    | 0,00289       | 0,0521      | 1           | 0,684       | 5,62E-12   | 1          |
| FDR-adjusted p-value | 1           | 1,89E-06    | 0,0318        | 0,287       | 1           | 1           | 6,18E-11   | 1          |
| <b>EDOT</b>          | <b>TP53</b> | <b>KRAS</b> | <b>PIK3CA</b> | <b>BRAF</b> | <b>NRAS</b> | <b>PTEN</b> | <b>APC</b> | <b>RB1</b> |
| Proportion in %      | 82          | 44          | 9             | 4           | 7           | 0           | 7          | 16         |
| Fisher p-value       | 0,0054      | 0,0000125   | 0,811         | 1           | 0,861       | 1           | 0,956      | 0,538      |
| FDR-adjusted p-value | 0,0297      | 0,0000688   | 1             | 1           | 1           | 1           | 0,997      | 1          |
| <b>Mixed 1</b>       | <b>TP53</b> | <b>KRAS</b> | <b>PIK3CA</b> | <b>BRAF</b> | <b>NRAS</b> | <b>PTEN</b> | <b>APC</b> | <b>RB1</b> |
| Proportion in %      | 48          | 48          | 10            | 19          | 19          | 5           | 14         | 5          |
| Fisher p-value       | 0,96        | 0,00164     | 0,786         | 0,593       | 0,0762      | 1           | 0,609      | 1          |
| FDR-adjusted p-value | 1           | 0,00601     | 1             | 1           | 0,419       | 1           | 0,997      | 1          |
| <b>HAL</b>           | <b>TP53</b> | <b>KRAS</b> | <b>PIK3CA</b> | <b>BRAF</b> | <b>NRAS</b> | <b>PTEN</b> | <b>APC</b> | <b>RB1</b> |
| Proportion in %      | 64          | 8           | 3             | 3           | 23          | 11          | 8          | 5          |
| Fisher p-value       | 0,584       | 0,983       | 1             | 0,999       | 0,0000602   | 0,738       | 0,997      | 0,941      |
| FDR-adjusted p-value | 1           | 1           | 1             | 1           | 0,000662    | 1           | 0,997      | 1          |
| <b>Mixed 2</b>       | <b>TP53</b> | <b>KRAS</b> | <b>PIK3CA</b> | <b>BRAF</b> | <b>NRAS</b> | <b>PTEN</b> | <b>APC</b> | <b>RB1</b> |
| Proportion in %      | 51          | 29          | 18            | 10          | 0           | 12          | 10         | 4          |
| Fisher p-value       | 0,951       | 0,00862     | 0,157         | 0,744       | 1           | 0,703       | 0,862      | 0,949      |
| FDR-adjusted p-value | 1           | 0,0237      | 0,432         | 1           | 1           | 1           | 0,997      | 1          |
| <b>GLSR</b>          | <b>TP53</b> | <b>KRAS</b> | <b>PIK3CA</b> | <b>BRAF</b> | <b>NRAS</b> | <b>PTEN</b> | <b>APC</b> | <b>RB1</b> |
| Proportion in %      | 58          | 5           | 11            | 9           | 9           | 24          | 12         | 18         |
| Fisher p-value       | 0,847       | 0,998       | 0,902         | 0,935       | 0,29        | 0,0236      | 0,865      | 0,208      |
| FDR-adjusted p-value | 1           | 1           | 1             | 1           | 0,797       | 0,259       | 0,997      | 0,763      |
| <b>Mixed 3</b>       | <b>TP53</b> | <b>KRAS</b> | <b>PIK3CA</b> | <b>BRAF</b> | <b>NRAS</b> | <b>PTEN</b> | <b>APC</b> | <b>RB1</b> |
| Proportion in %      | 59          | 11          | 14            | 14          | 0           | 16          | 11         | 19         |
| Fisher p-value       | 0,801       | 0,818       | 0,563         | 0,766       | 1           | 0,505       | 0,829      | 0,0432     |
| FDR-adjusted p-value | 1           | 1           | 1             | 1           | 1           | 1           | 0,997      | 0,238      |
| <b>ADG</b>           | <b>TP53</b> | <b>KRAS</b> | <b>PIK3CA</b> | <b>BRAF</b> | <b>NRAS</b> | <b>PTEN</b> | <b>APC</b> | <b>RB1</b> |
| Proportion in %      | 77          | 3           | 23            | 3           | 8           | 8           | 13         | 0          |
| Fisher p-value       | 0,0911      | 0,994       | 0,147         | 0,978       | 0,536       | 0,864       | 0,77       | 1          |
| FDR-adjusted p-value | 0,334       | 1           | 0,432         | 1           | 0,983       | 1           | 0,997      | 1          |
| <b>SKCM</b>          | <b>TP53</b> | <b>KRAS</b> | <b>PIK3CA</b> | <b>BRAF</b> | <b>NRAS</b> | <b>PTEN</b> | <b>APC</b> | <b>RB1</b> |
| Proportion in %      | 31          | 0           | 0             | 81          | 15          | 15          | 15         | 4          |
| Fisher p-value       | 1           | 1           | 1             | 1,42E-10    | 0,163       | 0,375       | 0,578      | 1          |
| FDR-adjusted p-value | 1           | 1           | 1             | 1,56E-09    | 0,599       | 1           | 0,997      | 1          |
| <b>BRCA</b>          | <b>TP53</b> | <b>KRAS</b> | <b>PIK3CA</b> | <b>BRAF</b> | <b>NRAS</b> | <b>PTEN</b> | <b>APC</b> | <b>RB1</b> |
| Proportion in %      | 73          | 3           | 24            | 6           | 0           | 21          | 3          | 12         |
| Fisher p-value       | 0,168       | 0,988       | 0,0713        | 0,838       | 1           | 0,152       | 0,992      | 0,534      |
| FDR-adjusted p-value | 0,462       | 1           | 0,392         | 1           | 1           | 0,836       | 0,997      | 1          |

## Supplementary Table 2

| <b>SCLC</b>          | <b>TP53</b> | <b>KRAS</b> | <b>PIK3CA</b> | <b>BRAF</b> | <b>NRAS</b> | <b>PTEN</b> | <b>APC</b> | <b>RB1</b> |
|----------------------|-------------|-------------|---------------|-------------|-------------|-------------|------------|------------|
| Proportion in %      | 72          | 6           | 6             | 0           | 3           | 9           | 6          | 31         |
| Fisher p-value       | 0,0389      | 1           | 0,805         | 1           | 0,864       | 0,482       | 0,403      | 7,72E-06   |
| FDR-adjusted p-value | 0,139       | 1           | 1             | 1           | 1           | 1           | 1          | 0,000232   |
| <b>GI</b>            | <b>TP53</b> | <b>KRAS</b> | <b>PIK3CA</b> | <b>BRAF</b> | <b>NRAS</b> | <b>PTEN</b> | <b>APC</b> | <b>RB1</b> |
| Proportion in %      | 65          | 62          | 16            | 11          | 0           | 3           | 49         | 0          |
| Fisher p-value       | 0,622       | 1,87E-08    | 0,124         | 0,783       | 1           | 0,916       | 5,68E-14   | 1          |
| FDR-adjusted p-value | 0,629       | 1,09E-06    | 0,319         | 1           | 1           | 1           | 6,63E-11   | 1          |
| <b>EDOT</b>          | <b>TP53</b> | <b>KRAS</b> | <b>PIK3CA</b> | <b>BRAF</b> | <b>NRAS</b> | <b>PTEN</b> | <b>APC</b> | <b>RB1</b> |
| Proportion in %      | 72          | 56          | 6             | 11          | 17          | 0           | 6          | 11         |
| Fisher p-value       | 0,466       | 0,00104     | 0,85          | 0,769       | 0,0983      | 1           | 1          | 0,548      |
| FDR-adjusted p-value | 0,629       | 0,00014     | 1             | 1           | 1           | 1           | 1          | 1          |
| <b>Mixed 1</b>       | <b>TP53</b> | <b>KRAS</b> | <b>PIK3CA</b> | <b>BRAF</b> | <b>NRAS</b> | <b>PTEN</b> | <b>APC</b> | <b>RB1</b> |
| Proportion in %      | 58          | 28          | 21            | 15          | 8           | 8           | 2          | 6          |
| Fisher p-value       | 0,515       | 0,0107      | 0,0141        | 0,649       | 0,509       | 0,71        | 0,947      | 0,438      |
| FDR-adjusted p-value | 0,782       | 0,131       | 0,105         | 1           | 1           | 1           | 1          | 1          |
| <b>HAL</b>           | <b>TP53</b> | <b>KRAS</b> | <b>PIK3CA</b> | <b>BRAF</b> | <b>NRAS</b> | <b>PTEN</b> | <b>APC</b> | <b>RB1</b> |
| Proportion in %      | 69          | 3           | 3             | 3           | 21          | 8           | 0          | 2          |
| Fisher p-value       | 0,309       | 0,995       | 0,988         | 0,965       | 0,000334    | 0,498       | 1          | 0,952      |
| FDR-adjusted p-value | 0,629       | 1           | 1             | 1           | 0,00627     | 1           | 1          | 1          |
| <b>Mixed 2</b>       | <b>TP53</b> | <b>KRAS</b> | <b>PIK3CA</b> | <b>BRAF</b> | <b>NRAS</b> | <b>PTEN</b> | <b>APC</b> | <b>RB1</b> |
| Proportion in %      | 54          | 23          | 15            | 5           | 0           | 8           | 0          | 8          |
| Fisher p-value       | 0,98        | 0,0776      | 0,359         | 0,783       | 1           | 0,668       | 1          | 0,22       |
| FDR-adjusted p-value | 0,999       | 0,966       | 0,424         | 1           | 1           | 1           | 1          | 1          |
| <b>GLSR</b>          | <b>TP53</b> | <b>KRAS</b> | <b>PIK3CA</b> | <b>BRAF</b> | <b>NRAS</b> | <b>PTEN</b> | <b>APC</b> | <b>RB1</b> |
| Proportion in %      | 60          | 0           | 4             | 10          | 4           | 21          | 0          | 6          |
| Fisher p-value       | 0,83        | 1           | 0,94          | 0,414       | 0,781       | 0,185       | 1          | 0,878      |
| FDR-adjusted p-value | 0,999       | 1           | 1             | 1           | 1           | 0,57        | 1          | 1          |
| <b>Mixed 3</b>       | <b>TP53</b> | <b>KRAS</b> | <b>PIK3CA</b> | <b>BRAF</b> | <b>NRAS</b> | <b>PTEN</b> | <b>APC</b> | <b>RB1</b> |
| Proportion in %      | 52          | 5           | 2             | 2           | 8           | 8           | 5          | 8          |
| Fisher p-value       | 0,895       | 0,958       | 0,99          | 1           | 0,526       | 0,931       | 0,612      | 0,48       |
| FDR-adjusted p-value | 0,999       | 1           | 1             | 1           | 1           | 1           | 1          | 1          |
| <b>ADG</b>           | <b>TP53</b> | <b>KRAS</b> | <b>PIK3CA</b> | <b>BRAF</b> | <b>NRAS</b> | <b>PTEN</b> | <b>APC</b> | <b>RB1</b> |
| Proportion in %      | 76          | 9           | 11            | 4           | 4           | 4           | 4          | 4          |
| Fisher p-value       | 0,00281     | 0,73        | 0,436         | 0,936       | 0,882       | 0,977       | 0,743      | 0,926      |
| FDR-adjusted p-value | 0,139       | 1           | 1             | 1           | 1           | 1           | 1          | 1          |
| <b>SKCM</b>          | <b>TP53</b> | <b>KRAS</b> | <b>PIK3CA</b> | <b>BRAF</b> | <b>NRAS</b> | <b>PTEN</b> | <b>APC</b> | <b>RB1</b> |
| Proportion in %      | 38          | 0           | 0             | 75          | 17          | 12          | 0          | 0          |
| Fisher p-value       | 0,998       | 1           | 1             | 5,01E-09    | 0,0725      | 0,674       | 1          | 1          |
| FDR-adjusted p-value | 0,999       | 1           | 1             | 1,48E-06    | 0,465       | 1           | 1          | 1          |
| <b>BRCA</b>          | <b>TP53</b> | <b>KRAS</b> | <b>PIK3CA</b> | <b>BRAF</b> | <b>NRAS</b> | <b>PTEN</b> | <b>APC</b> | <b>RB1</b> |
| Proportion in %      | 69          | 2           | 21            | 2           | 0           | 10          | 0          | 2          |
| Fisher p-value       | 0,133       | 0,997       | 0,0175        | 0,981       | 1           | 0,573       | 1          | 1          |
| FDR-adjusted p-value | 0,602       | 1           | 0,105         | 1           | 1           | 1           | 1          | 1          |

### Supplementary Table 3

| Drug      | Cluster | Effect (-Log10(IC50(M))) | 95% CI (-Log10(IC50(M))) | pvalue  | adjusted pvalue | Drug response relative to other cell lines |
|-----------|---------|--------------------------|--------------------------|---------|-----------------|--------------------------------------------|
| Erlotinib | ADG     | 1.07                     | (0.44 to 1.71)           | 3.5E-03 | 3.9E-02         | Sensitive                                  |
| Lapatinib | SCLC    | -0.41                    | (-0.67 to -0.14)         | 3.6E-03 | 3.2E-02         | Resistant                                  |
|           | ADG     | 1.12                     | (0.53 to 1.69)           | 1.5E-03 | 1.5E-02         | Sensitive                                  |
| PD0332991 | GI      | -0.46                    | (-0.71 to -0.21)         | 7.2E-04 | 7.2E-03         | Resistant                                  |
|           | HAL     | 0.74                     | (0.38 to 1.1)            | 2.0E-04 | 2.2E-03         | Sensitive                                  |
| PLX4720   | SKCM    | 1.39                     | (0.86 to 1.93)           | 1.9E-05 | 2.1E-04         | Sensitive                                  |
| PD0325901 | GI      | 0.46                     | (0.15 to 0.78)           | 5.4E-03 | 4.9E-02         | Sensitive                                  |
|           | SKCM    | 1.31                     | (0.79 to 1.82)           | 3.3E-05 | 3.6E-04         | Sensitive                                  |
| AZD6244   | SKCM    | 1.25                     | (0.69 to 1.81)           | 2.3E-04 | 2.6E-03         | Sensitive                                  |
|           | BRCA    | -0.45                    | (-0.74 to -0.16)         | 3.4E-03 | 3.4E-02         | Resistant                                  |



Supplementary Table 5

|                |                           |                   |
|----------------|---------------------------|-------------------|
| <b>GI</b>      | <b>Drug</b>               | <b>Target</b>     |
|                | drugid_17AAG              | Other             |
|                | drugid_AZD6244            | S/T Kinase        |
|                | drugid_PD0325901          | S/T Kinase        |
| <b>EDOT</b>    | <b>Drug</b>               | <b>Target</b>     |
|                | drugid_DOXORUBICIN        | Chemotherapy      |
| <b>Mixed 1</b> | <b>Drug</b>               | <b>Target</b>     |
|                | drugid_GEMCITABINE        | Chemotherapy      |
|                | drugid_BLEOMYCIN          | Chemotherapy      |
|                | drugid_VINBLASTINE        | Chemotherapy      |
|                | drugid_NVP-BEZ235         | S/T Kinase, Other |
| <b>HAL</b>     | <b>Drug</b>               | <b>Target</b>     |
|                | drugid_IRINOTECAN         | Chemotherapy      |
|                | drugid_L685458            | Other             |
|                | drugid_PANOBINOSTAT       | Other             |
|                | drugid_TOPOTECAN          | Chemotherapy      |
|                | drugid_SUNITINIB          | RTK               |
|                | drugid_CRIZOTINIB         | RTK               |
|                | drugid_XMD8-85            | S/T Kinase        |
|                | drugid_DMOG               | Other             |
|                | drugid_PAC-1              | Other             |
|                | drugid_IPA-3              | S/T Kinase        |
|                | drugid_BAY-61-3606        | CTK               |
|                | drugid_AICAR              | S/T Kinase        |
|                | drugid_CAMP107HECIN-WT5I  | Chemotherapy      |
|                | drugid_METHOTREXATE       | Chemotherapy      |
|                | drugid_ATHRA              | Other             |
|                | drugid_GEFITINIB          | RTK               |
|                | drugid_ABT-263            | Other             |
|                | drugid_VORINOSTAT         | Other             |
|                | drugid_NILOTNIB           | CTK               |
|                | drugid_TEMSIROLIMUS       | S/T Kinase        |
|                | drugid_AZD-2281           | Other             |
|                | drugid_ABT-888            | Other             |
|                | drugid_BOSUTINIB          | CTK               |
|                | drugid_LENALIDOMIDE       | Other             |
|                | drugid_AZD7762            | S/T Kinase        |
|                | drugid_CEP-701            | RTK, CTK          |
|                | drugid_VX-702             | S/T Kinase        |
|                | drugid_SL-0101-1          | S/T Kinase        |
|                | drugid_681640             | S/T Kinase, CTK   |
|                | drugid_PD-173074          | RTK               |
|                | drugid_ZM-447439          | S/T Kinase        |
|                | drugid_PD0332991          | S/T Kinase        |
|                | drugid_S8590885           | S/T Kinase        |
| <b>Mixed 2</b> | <b>Drug</b>               | <b>Target</b>     |
|                | drugid_MIDOSTAURIN        | RTK               |
| <b>GLSR</b>    | <b>Drug</b>               | <b>Target</b>     |
|                | drugid_DASATINIB          | CTK, RTK          |
|                | drugid_BORTEZOMIB         | Other             |
|                | drugid_MIDOSTAURIN        | RTK               |
|                | drugid_CHIR-99021         | S/T Kinase        |
|                | drugid_AZD6482            | Other             |
|                | drugid_BEXAROTENE         | Other             |
|                | drugid_LFM-A13            | CTK               |
|                | drugid_PAZOPANIB          | RTK               |
|                | drugid_VINBLASTINE        | Chemotherapy      |
|                | drugid_DOCETAXEL          | Chemotherapy      |
|                | drugid_TEMSIROLIMUS       | S/T Kinase        |
|                | drugid_ELESCLOMOL         | Other             |
|                | drugid_BX-795             | S/T Kinase        |
|                | drugid_NVP-BEZ235         | S/T Kinase, Other |
|                | drugid_GDC0941            | Other             |
| <b>Mixed 3</b> | <b>Drug</b>               | <b>Target</b>     |
|                | drugid_VORINOSTAT         | Other             |
| <b>ADG</b>     | <b>Drug</b>               | <b>Target</b>     |
|                | drugid_AZD0530            | RTK               |
|                | drugid_VANDETANIB         | RTK               |
|                | drugid_ERLOTINIB          | RTK               |
|                | drugid_LAPATINIB          | RTK               |
|                | drugid_VINORELBINE        | Chemotherapy      |
|                | drugid_BICALUTAMIDE       | Other             |
|                | drugid_PF-562271          | S/T Kinase        |
|                | drugid_OBATOCLOX-MESYLATE | Other             |
|                | drugid_EPOTHILONE-B       | Other             |
|                | drugid_AICAR              | S/T Kinase        |
|                | drugid_VINBLASTINE        | Chemotherapy      |
|                | drugid_DOCETAXEL          | Chemotherapy      |
|                | drugid_GEFITINIB          | RTK               |
|                | drugid_BOSUTINIB          | CTK               |
|                | drugid_17AAG              | Other             |
|                | drugid_BIBW2992           | RTK               |
| <b>SKCM</b>    | <b>Drug</b>               | <b>Target</b>     |
|                | drugid_AZD6244            | S/T Kinase        |
|                | drugid_EMBELIN            | Other             |
|                | drugid_FH535              | Other             |
|                | drugid_OBATOCLOX-MESYLATE | Other             |
|                | drugid_RDEA119            | S/T Kinase        |
|                | drugid_CI-1040            | S/T Kinase        |
|                | drugid_CEP-701            | RTK, CTK          |
|                | drugid_PLY4720            | S/T Kinase        |
|                | drugid_NUTLIN3            | Other             |
|                | drugid_PD0325901          | S/T Kinase        |
|                | drugid_S8590885           | S/T Kinase        |
|                | drugid_AZD6244            | S/T Kinase        |
| <b>BRCA</b>    | <b>Drug</b>               | <b>Target</b>     |
|                | drugid_AKT-INHIBITOR-VIII | S/T Kinase        |
|                | drugid_MK-2206            | S/T Kinase        |

# Supplementary Table 6

| SCLC | Drug                       | Target       |
|------|----------------------------|--------------|
|      | drugid_ERLOTINIB           | RTK          |
|      | drugid_LBW242              | #N/A         |
|      | drugid_PD0332991           | S/T Kinase   |
|      | drugid_PHA665752           | RTK          |
|      | drugid_PLX4720             | S/T Kinase   |
|      | drugid_SORAFENIB           | RTK          |
|      | drugid_SUNITINIB           | RTK          |
|      | drugid_MG-132              | Other        |
|      | drugid_CYCLOPAMINE         | GPCR         |
|      | drugid_AZ628               | S/T Kinase   |
|      | drugid_CRIZOTINIB          | RTK          |
|      | drugid_Z-LNLE-CHO-         | Other        |
|      | drugid_DASATINIB           | CTK, RTK     |
|      | drugid_WH-4-023            | CTK          |
|      | drugid_BMS-536924          | RTK          |
|      | drugid_JW-7-52-1           | S/T Kinase   |
|      | drugid_BORTEZOMIB          | Other        |
|      | drugid_XMD8-85             | S/T Kinase   |
|      | drugid_LAPATINIB           | RTK          |
|      | drugid_GEMCITABINE         | Chemotherapy |
|      | drugid_MIDOSTAURIN         | RTK          |
|      | drugid_CHIR-99021          | S/T Kinase   |
|      | drugid_AP-24534            | CTK          |
|      | drugid_AZD6482             | Other        |
|      | drugid_PF-562271           | S/T Kinase   |
|      | drugid_FTI-277             | Other        |
|      | drugid_SHIKONIN            | Other        |
|      | drugid_EMBELIN             | Other        |
|      | drugid_OBATOCCLAX-MESYLATI | Other        |
|      | drugid_BEXAROTENE          | Other        |
|      | drugid_TIPIFARNIB          | Other        |
|      | drugid_RDEA119             | S/T Kinase   |
|      | drugid_CI-1040             | S/T Kinase   |
|      | drugid_PD0325901           | S/T Kinase   |

| GI | Drug                      | Target            |
|----|---------------------------|-------------------|
|    | drugid_AP-24534           | CTK               |
|    | drugid_AZD6482            | Other             |
|    | drugid_DMOG               | Other             |
|    | drugid_IPA-3              | S/T Kinase        |
|    | drugid_PAZOPANIB          | RTK               |
|    | drugid_CAMPOTOTHECIN-WTSl | Chemotherapy      |
|    | drugid_VINBLASTINE        | Chemotherapy      |
|    | drugid_CISPLATIN          | Chemotherapy      |
|    | drugid_DOCETAXEL          | Chemotherapy      |
|    | drugid_ATHA               | Other             |
|    | drugid_NILOTINIB          | CTK               |
|    | drugid_TEMSIROLIMUS       | S/T Kinase        |
|    | drugid_AZD-2281           | Other             |
|    | drugid_BOSUTINIB          | CTK               |
|    | drugid_AXITINIB           | RTK               |
|    | drugid_CEP-701            | RTK, CTK          |
|    | drugid_AMG-706            | RTK               |
|    | drugid_ELESCLOMOL         | Other             |
|    | drugid_PLX4720            | S/T Kinase        |
|    | drugid_BX-795             | S/T Kinase        |
|    | drugid_SL-0101-1          | S/T Kinase        |
|    | drugid_BI-D1870           | S/T Kinase        |
|    | drugid_JNK-INHIBITOR-VIII | S/T Kinase        |
|    | drugid_681640             | S/T Kinase, CTK   |
|    | drugid_PD-173074          | RTK               |
|    | drugid_ZM-447439          | S/T Kinase        |
|    | drugid_RO-3306            | S/T Kinase        |
|    | drugid_PD0332991          | S/T Kinase        |
|    | drugid_NVP-BE2235         | S/T Kinase, Other |
|    | drugid_GDC0941            | Other             |
|    | drugid_AZD8055            | S/T Kinase        |

| EDOT | Drug                 | Target     |
|------|----------------------|------------|
|      | drugid_L685458       | #N/A       |
|      | drugid_PD0332991     | S/T Kinase |
|      | drugid_PHA665752     | RTK        |
|      | drugid_PLX4720       | S/T Kinase |
|      | drugid_TKI258        | RTK        |
|      | drugid_CYCLOPAMINE   | GPCR       |
|      | drugid_CRIZOTINIB    | RTK        |
|      | drugid_PYRIMETHAMINE | Other      |
|      | drugid_ATHA          | Other      |
|      | drugid_TEMSIROLIMUS  | S/T Kinase |
|      | drugid_VX-702        | S/T Kinase |

| Mixed 1 | Drug              | Target |
|---------|-------------------|--------|
|         | drugid_ERLOTINIB  | RTK    |
|         | drugid_L685458    | #N/A   |
|         | drugid_LBW242     | #N/A   |
|         | drugid_NILOTINIB  | CTK    |
|         | drugid_VANDETANIB | #N/A   |
|         | drugid_GEFITINIB  | RTK    |
|         | drugid_BIBW2992   | RTK    |

| HAL | Drug                | Target       |
|-----|---------------------|--------------|
|     | drugid_ERLOTINIB    | RTK          |
|     | drugid_KIN001-135   | S/T Kinase   |
|     | drugid_LAPATINIB    | RTK          |
|     | drugid_NSC-87877    | Other        |
|     | drugid_BICALUTAMIDE | Other        |
|     | drugid_FTI-277      | Other        |
|     | drugid_FH535        | Other        |
|     | drugid_BMS-754807   | RTK          |
|     | drugid_BRYOSTATIN-1 | S/T Kinase   |
|     | drugid_DOCETAXEL    | Chemotherapy |
|     | drugid_AZD-2281     | Other        |
|     | drugid_AXITINIB     | RTK          |
|     | drugid_GW-441756    | RTK          |
|     | drugid_VX-702       | S/T Kinase   |
|     | drugid_MK-2206      | S/T Kinase   |

| Mixed 2 | Drug                | Target       |
|---------|---------------------|--------------|
|         | drugid_AZD6244      | S/T Kinase   |
|         | drugid_IRINOTECAN   | Chemotherapy |
|         | drugid_L685458      | #N/A         |
|         | drugid_NILOTINIB    | CTK          |
|         | drugid_PANOBINOSTAT | #N/A         |
|         | drugid_AICAR        | S/T Kinase   |
|         | drugid_17AAG        | Other        |

| GLSR | Drug                | Target       |
|------|---------------------|--------------|
|      | drugid_AZD0530      | CTK          |
|      | drugid_ERLOTINIB    | RTK          |
|      | drugid_LAPATINIB    | RTK          |
|      | drugid_PANOBINOSTAT | #N/A         |
|      | drugid_PLX4720      | S/T Kinase   |
|      | drugid_SORAFENIB    | RTK          |
|      | drugid_VANDETANIB   | #N/A         |
|      | drugid_PAC-1        | Other        |
|      | drugid_METHOTREXATE | Chemotherapy |
|      | drugid_GEFITINIB    | RTK          |

| Mixed 3 | Drug                | Target     |
|---------|---------------------|------------|
|         | drugid_ERLOTINIB    | RTK        |
|         | drugid_LBW242       | #N/A       |
|         | drugid_PHA665752    | RTK        |
|         | drugid_PLX4720      | S/T Kinase |
|         | drugid_Z-LNLE-CHO-  | Other      |
|         | drugid_DASATINIB    | CTK, RTK   |
|         | drugid_BICALUTAMIDE | Other      |
|         | drugid_BIBW2992     | RTK        |

| ADG | Drug               | Target     |
|-----|--------------------|------------|
|     | drugid_CRIZOTINIB  | RTK        |
|     | drugid_PLX4720     | S/T Kinase |
|     | drugid_SORAFENIB   | RTK        |
|     | drugid_CYCLOPAMINE | GPCR       |
|     | drugid_GSK269962A  | S/T Kinase |
|     | drugid_PAZOPANIB   | RTK        |
|     | drugid_SB-216763   | S/T Kinase |

| SKCM | Drug                      | Target     |
|------|---------------------------|------------|
|      | drugid_AZD0530            | CTK        |
|      | drugid_ERLOTINIB          | RTK        |
|      | drugid_L685458            | #N/A       |
|      | drugid_LAPATINIB          | RTK        |
|      | drugid_PD0332991          | S/T Kinase |
|      | drugid_SORAFENIB          | RTK        |
|      | drugid_TAE684             | RTK        |
|      | drugid_VANDETANIB         | #N/A       |
|      | drugid_WZ-1-84            | CTK        |
|      | drugid_AKT-INHIBITOR-VIII | S/T Kinase |
|      | drugid_AICAR              | S/T Kinase |
|      | drugid_GEFITINIB          | RTK        |
|      | drugid_BIBW2992           | RTK        |

| BRCA | Drug                       | Target          |
|------|----------------------------|-----------------|
|      | drugid_AZD6244             | S/T Kinase      |
|      | drugid_PLX4720             | S/T Kinase      |
|      | drugid_TOPOTECAN           | Chemotherapy    |
|      | drugid_GEMCITABINE         | Chemotherapy    |
|      | drugid_AP-24534            | CTK             |
|      | drugid_DMOG                | Other           |
|      | drugid_BAY-61-3606         | CTK             |
|      | drugid_OBATOCCLAX-MESYLATI | Other           |
|      | drugid_CAMPOTOTHECIN-WTSl  | Chemotherapy    |
|      | drugid_CYTARABINE          | Chemotherapy    |
|      | drugid_METHOTREXATE        | Chemotherapy    |
|      | drugid_RDEA119             | S/T Kinase      |
|      | drugid_CI-1040             | S/T Kinase      |
|      | drugid_AZD-2281            | Other           |
|      | drugid_CEP-701             | RTK, CTK        |
|      | drugid_SB-216763           | S/T Kinase      |
|      | drugid_BX-795              | S/T Kinase      |
|      | drugid_BI-D1870            | S/T Kinase      |
|      | drugid_681640              | S/T Kinase, CTK |
|      | drugid_AZD6244             | S/T Kinase      |

## Supplementary Table 7

### CCL

| Drug       | Cluster | Effect (AUC) | 95% CI (AUC)     | pvalue   | adjusted pvalue | Drug response relative to other cell lines |
|------------|---------|--------------|------------------|----------|-----------------|--------------------------------------------|
| Erlotinib  | ADG     | 0,05         | (0,015 to 0,08)  | 0.0052   | 0.0360          | Sensitive                                  |
| Lapatinib  | HAL     | -0,04        | (0,06 to -0,02)  | 1,00E-04 | 9,00E-04        | Resistant                                  |
| AZD6244    | SKCM    | 0,2          | (0,13 to 0,27)   | 5,00E-06 | 5,00E-05        | Sensitive                                  |
| PLX4720    | BRCA    | -0,079       | (-0,12 to -0,04) | 2,00E-04 | 2,00E-03        | Resistant                                  |
| Crizotinib | SKCM    | 0,16         | (0,10 to 0,23)   | 3.1e-05  | 3.4e-04         | Sensitive                                  |
| AZD0530    | SKCM    | -0,04        | (-0,05 to -0,02) | 3.8e-05  | 4.2e-04         | Resistant                                  |
|            | SKCM    | -0,08        | (-0,09 to -0,06) | 2.4e-09  | 2.7e-08         | Resistant                                  |

### GDSC

| Drug       | Cluster | Effect (AUC) | 95% CI (AUC)      | pvalue   | adjusted pvalue | Drug response relative to other cell lines |
|------------|---------|--------------|-------------------|----------|-----------------|--------------------------------------------|
| Erlotinib  | ADG     | 0,09         | (0,04 to 0,14)    | 0.003    | 0.0360          | Sensitive                                  |
| Lapatinib  | HAL     | -0,04        | (-0,04 to -0,02)  | 2,39E-05 | 3,00E-04        | Resistant                                  |
| AZD6244    | SKCM    | 0,17         | (0,09 to 0,25)    | 3,00E-03 | 5,00E-05        | Sensitive                                  |
| PLX4720    | BRCA    | -0,05        | (-0,08 to -0,021) | 0.001    | 0.01            | Resistant                                  |
| Crizotinib | SKCM    | 0,16         | (0,10 to 0,23)    | 1,00E-04 | 1,00E-03        | Sensitive                                  |
| AZD0530    | SKCM    | -0,03        | (-0,04 to -0,01)  | 7.9e-06  | 6.3e-05         | Resistant                                  |
|            | SKCM    | -0,03        | (-0,05 to -0,01)  | 0.002    | 0.020           | Resistant                                  |

## Supplementary Table 8

| CCLF      |         |                                                    |                                                    |          |                 |                                            |
|-----------|---------|----------------------------------------------------|----------------------------------------------------|----------|-----------------|--------------------------------------------|
| Drug      | Cluster | Effect (-Log <sub>10</sub> (IC <sub>50</sub> (M))) | 95% CI (-Log <sub>10</sub> (IC <sub>50</sub> (M))) | pvalue   | adjusted pvalue | Drug response relative to other cell lines |
| Lapatinib | Mix 1   | -0,14                                              | (-0.2 to -0.075)                                   | 0,000024 | 0,000024        | Resistant                                  |
|           | SKCM    | -0,13                                              | (-0.19 to -0.071)                                  | 0,000044 | 0,000039        | Resistant                                  |

| GSK       |         |                                                    |                                                    |         |                 |                                            |
|-----------|---------|----------------------------------------------------|----------------------------------------------------|---------|-----------------|--------------------------------------------|
| Drug      | Cluster | Effect (-Log <sub>10</sub> (IC <sub>50</sub> (M))) | 95% CI (-Log <sub>10</sub> (IC <sub>50</sub> (M))) | pvalue  | adjusted pvalue | Drug response relative to other cell lines |
| Lapatinib | Mix 1   | -0,31                                              | (-0.5 to -0.12)                                    | 0,004   | 0,036           | Resistant                                  |
|           | SKCM    | -0,38                                              | (-0.52 to -0.24)                                   | 8,5E-07 | 0,0000093       | Resistant                                  |



Supplementary Table 9

| CCLF      |         |                          |                          |           |                 |                                            |
|-----------|---------|--------------------------|--------------------------|-----------|-----------------|--------------------------------------------|
| Drug      | Cluster | Effect (-Log10(IC50(M))) | 95% CI (-Log10(IC50(M))) | pvalue    | adjusted pvalue | Drug response relative to other cell lines |
| Erlotinib | Mix 1   | -0,12                    | (-0.17 to -0.073)        | 0,0000016 | 0,000015        | Resistant                                  |
|           | GLSR    | -0,13                    | (-0.18 to -0.08)         | 0,0000014 | 0,000015        | Resistant                                  |
|           | ADG     | 0,4                      | (0.13 to 0.66)           | 0,00053   | 0,032           | Sensitive                                  |
|           | SKCM    | -0,099                   | (-0.16 to -0.04)         | 0,00011   | 0,0079          | Resistant                                  |
| Lapatinib | Mix 1   | -0,14                    | (-0.2 to -0.069)         | 0,00015   | 0,0014          | Resistant                                  |
|           | ADG     | 0,27                     | (0.033 to 0.5)           | 0,027     | 0,19            | Sensitive                                  |
|           | SKCM    | 1,6                      | (1.1 to 2.1)             | 0,0000013 | 0,000012        | Sensitive                                  |
| PD0325901 | BRCA    | -0,73                    | (-0.92 to -0.54)         | 9,2E-12   | 9,2E-11         | Resistant                                  |

| gCSI      |         |                          |                          |           |                 |                                      |
|-----------|---------|--------------------------|--------------------------|-----------|-----------------|--------------------------------------|
| Drug      | Cluster | Effect (-Log10(IC50(M))) | 95% CI (-Log10(IC50(M))) | pvalue    | adjusted pvalue | Drug response relative to other cell |
| Erlotinib | Mix 1   | -0,19                    | (-0.26 to -0.11)         | 0,0000049 | 0,000051        | Resistant                            |
|           | GLSR    | -0,2                     | (-0.28 to -0.12)         | 0,0000046 | 0,000051        | Resistant                            |
|           | ADG     | 0,7                      | (0.36 to 1)              | 0,00044   | 0,0022          | Sensitive                            |
|           | SKCM    | -0,19                    | (-0.27 to -0.11)         | 0,0000048 | 0,000051        | Resistant                            |
| Lapatinib | Mix 1   | -0,19                    | (-0.32 to -0.06)         | 0,00061   | 0,055           | Resistant                            |
|           | ADG     | 0,55                     | (0.34 to 0.76)           | 0,000023  | 0,00023         | Sensitive                            |
|           | SKCM    | 2,1                      | (1.6 to 2.7)             | 1,7E-07   | 0,0000019       | Sensitive                            |
| PD0325901 | BRCA    | -1,1                     | (-1.5 to -0.74)          | 0,0000038 | 0,000038        | Resistant                            |

Supplementary Table 10

| Drug      | Cluster | Effect (1-Mean viability) | 95% CI (1-Mean viability) | pvalue    | adjusted pvalue | Drug response relative to other cell lines |
|-----------|---------|---------------------------|---------------------------|-----------|-----------------|--------------------------------------------|
| Erlotinib | SCLC    | -0,054                    | (-0.096 to -0.011)        | 0,025     | 0,15            | Resistant                                  |
|           | Mix 1   | -0,042                    | (-0.069 to -0.016)        | 0,0038    | 0,031           | Resistant                                  |
|           | HAL     | -0,014                    | (-0.051 to 0.022)         | 0,41      | 0,83            | Resistant                                  |
|           | GLSR    | -0,049                    | (-0.067 to -0.032)        | 0,0000005 | 0,0000055       | Resistant                                  |
|           | ADG     | 0,081                     | (0.037 to 0.12)           | 0,0011    | 0,011           | Sensitive                                  |
| PD0325901 | SKCM    | -0,039                    | (-0.063 to -0.014)        | 0,0031    | 0,028           | Resistant                                  |
|           | SKCM    | 0,25                      | (0.15 to 0.35)            | 0,000051  | 0,00051         | Sensitive                                  |
|           | SKCM    | -0,18                     | (-0.23 to -0.13)          | 8,5E-07   | 0,0000094       | Resistant                                  |
|           | BRCA    |                           |                           |           |                 |                                            |

| Drug      | Cluster | Effect (1-Mean viability) | 95% CI (1-Mean viability) | pvalue    | adjusted pvalue | Drug response relative to other cell lines |
|-----------|---------|---------------------------|---------------------------|-----------|-----------------|--------------------------------------------|
| Erlotinib | SCLC    | -0,042                    | (-0.18 to 0.094)          | 0,41      | 0,89            | Resistant                                  |
|           | Mix 1   | -0,076                    | (-0.1 to -0.049)          | 0,0000028 | 0,000028        | Resistant                                  |
|           | HAL     | -0,12                     | (-0.15 to -0.088)         | 3,2E-08   | 3,6E-07         | Resistant                                  |
|           | GLSR    | -0,041                    | (-0.068 to -0.015)        | 0,0028    | 0,022           | Resistant                                  |
|           | ADG     | 0,12                      | (0.064 to 0.18)           | 0,00035   | 0,0032          | Sensitive                                  |
| PD0325901 | SKCM    | -0,044                    | (-0.073 to -0.014)        | 0,0046    | 0,029           | Resistant                                  |
|           | SKCM    | 0,36                      | (0.26 to 0.46)            | 3,7E-07   | 0,000004        | Sensitive                                  |
|           | BRCA    | -0,2                      | (-0.29 to -0.12)          | 0,000064  | 0,00064         | Resistant                                  |

92 **Supplementary data – 1 and 2**

93 Summary of each cell line cluster with information regarding tissue composition, molecular  
94 profile and drug profile in respectively CCLE and GDSC.

95 The first block shows the cell lines belonging to the given cluster.

96 The second block shows tissue composition.

97 First window: proportion of lines for the cluster originating from a given tissue.

98 Second window: proportion of the lines from a given tissue belonging to the cluster.

99 Third window: Molecular profile of the cluster.

100 Mutation type of each cell line. Genes and cell lines are sorted according to the number of  
101 events. The expression profile of the cluster relative to all the other cell lines for the defined  
102 gene clusters is shown. The proportion of epithelial or mesenchymal cells, according to the  
103 signature defined by Taub *et al.*

104 The last window illustrates the drug profile associated with the cluster. A volcano plot  
105 representation of *t*-test results showing the magnitude (effect; *x*-axis) and significance ( $-\log_{10}$   
106 (*p*-value); *y*-axis) of all drug-cluster associations in the dataset. Each circle represents a single  
107 drug-cluster interaction and its size is proportional to the number of cell lines screened. The  
108 horizontal dashed line indicates the threshold of statistical significance ( $-\log_{10}(0.05)$ ). Barplot  
109 representation of the *t*-test results showing the proportion of drug types significantly  
110 associated with the cluster. List of drugs associated with the cluster ( $FDR < 0.05$ ) and their  
111 phenotype.

112

# SCLC Cluster - CCLE

## Cell lines in the cluster

|          |                 |           |          |
|----------|-----------------|-----------|----------|
| 22RV1    | DU-4475         | NCI-H1618 | NCI-H526 |
| BEN      | HUH-6-clone5    | NCI-H1930 | NCI-H727 |
| C3A      | LK-2            | NCI-H2029 | NCI-H810 |
| COLO-668 | LNCaP-Clone-FGC | NCI-H2081 | NCI-H889 |
| COR-L279 | MFE-280         | NCI-H209  | SCLC-21H |
| COR-L51  | NCI-H1048       | NCI-H2141 | SW620    |
| COR-L88  | NCI-H1092       | NCI-H2171 | TT       |
| DMS-153  | NCI-H1105       | NCI-H2196 |          |
| DMS-53   | NCI-H1436       | NCI-H510A |          |
| DMS-79   | NCI-H146        | NCI-H520  |          |

## Tissue composition

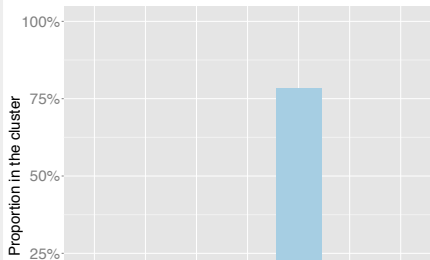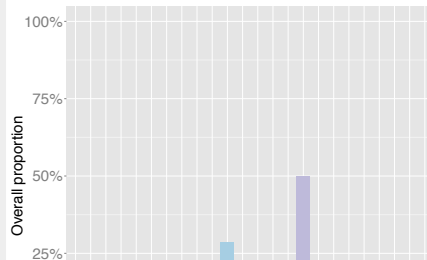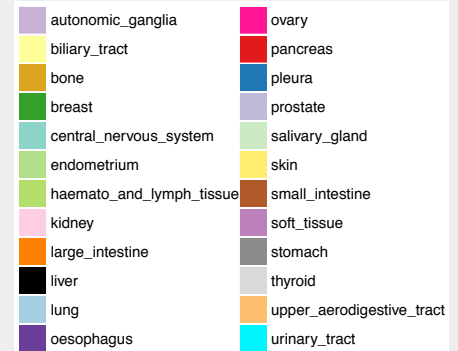

## Molecular profile

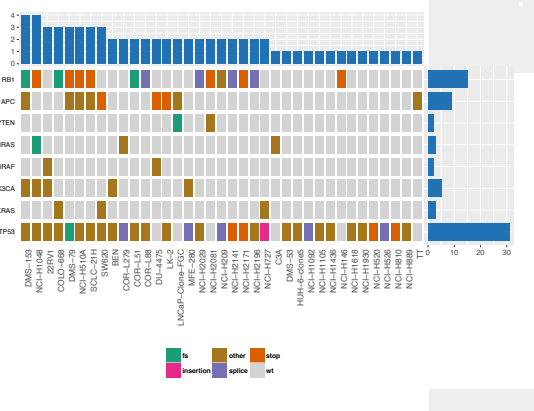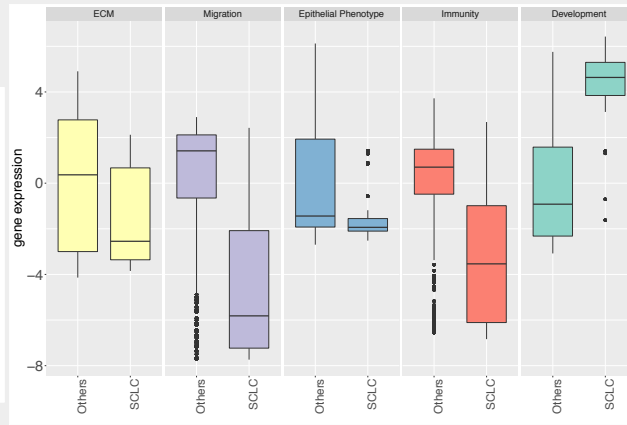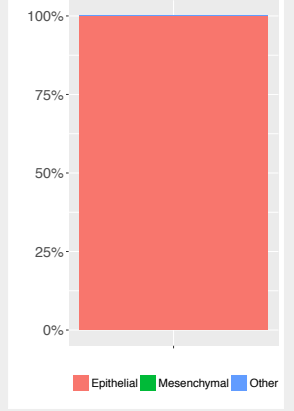

## Drug profile

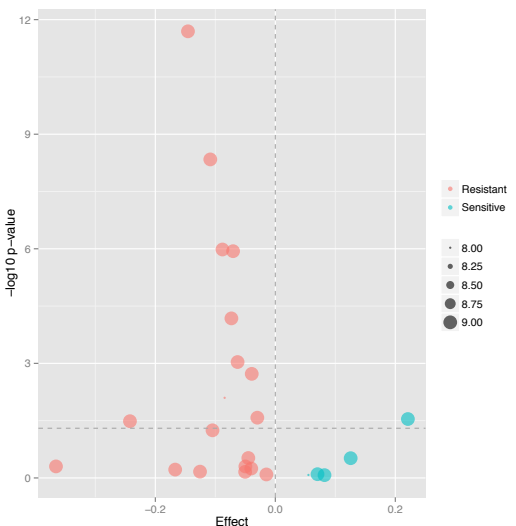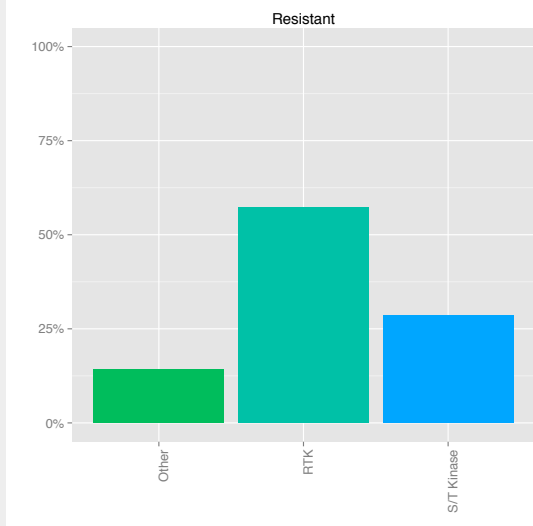

Drugs associated with the cluster (FDR < 0.05)

|           |           |
|-----------|-----------|
| ERLOTINIB | Resistant |
| LAPATINIB | Resistant |
| LBW242    | Resistant |
| PD0332991 | Resistant |
| PHA665752 | Resistant |
| PLX4720   | Resistant |
| SORAFENIB | Resistant |

# Gastrointestinal tract Cluster - CCLE

## Cell lines in the cluster

|          |         |            |           |
|----------|---------|------------|-----------|
| 23132-87 | HPAF-II | NCI-H2170  | SW1417    |
| AGS      | HT-29   | NCI-H508   | SW1463    |
| AsPC-1   | HT55    | NCI-N87    | SW403     |
| C2BBe1   | KATOIII | OE19       | SW48      |
| COLO-205 | KM12    | RCM-1      | SW837     |
| COLO-678 | LS-1034 | SK-CO-1    | SW948     |
| CW-2     | LS-411N | NCI-SNU-16 | T84       |
| DV-90    | LS-513  | NCI-SNU-5  | TGBC11TKB |
| HCT-116  | LoVo    | SNU-C1     |           |
| HCT-15   | MKN45   | SW1116     |           |

## Tissue composition

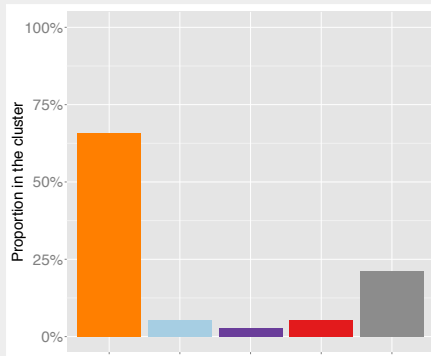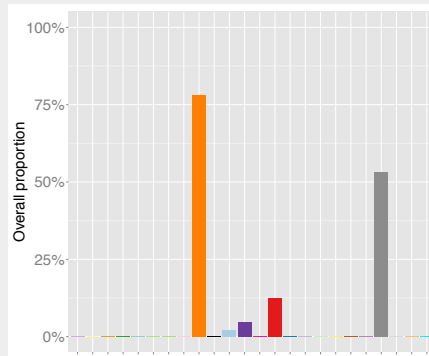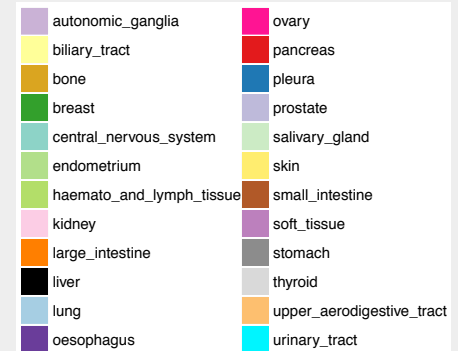

## Molecular profile

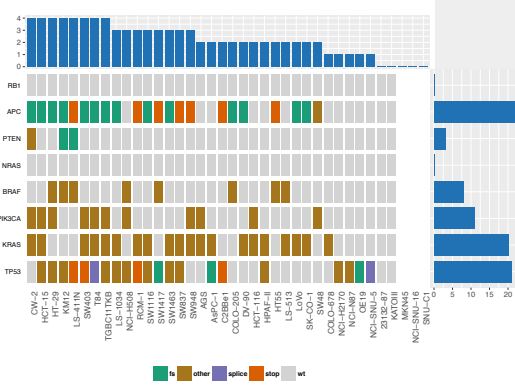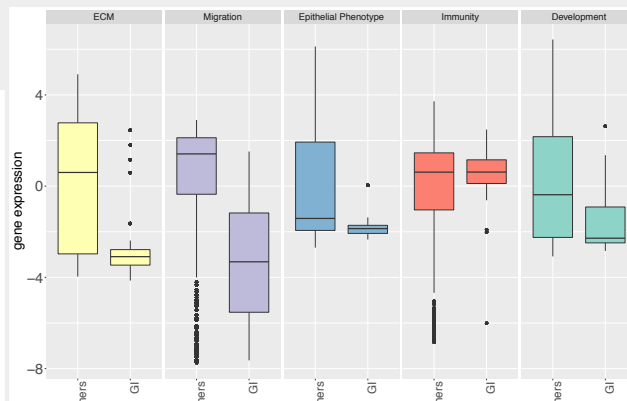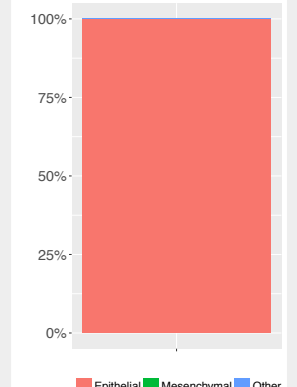

## Drug profile

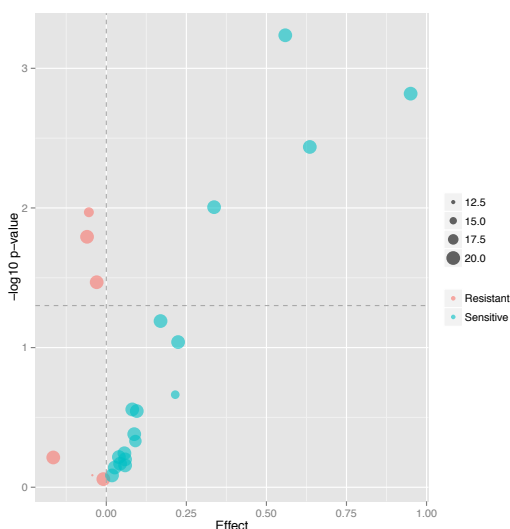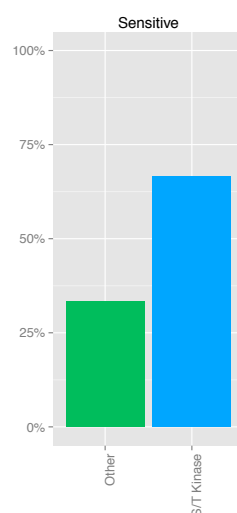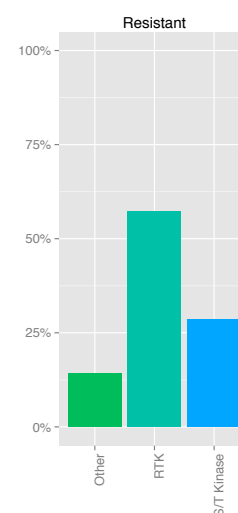

Drugs associated with the cluster (FDR < 0.05)

17AAG Sensible  
AZD6244 Sensible  
PD0325901 Sensible

# Endodermal origin Cluster - CCLE

## Cell lines in the cluster

|           |           |            |            |            |
|-----------|-----------|------------|------------|------------|
| 5637      | Capan-2   | LCLC-97TM1 | NCI-H2347  | PANC-08-13 |
| 647-V     | DU-145    | LS-123     | NCI-H358   | PANC-10-05 |
| CAL-12T   | EPLC-272H | MKN7       | NCI-H441   | SW900      |
| CAL-85-1  | HCC1143   | NCI-H1650  | NCI-H596   | TE-1       |
| CFPAC-1   | HCC38     | NCI-H1693  | NCI-H747   | YAPC       |
| COLO-680N | HSC-3     | NCI-H1838  | NUGC-3     |            |
| COR-L23   | HT-1197   | NCI-H1975  | OE33       |            |
| Calu-3    | HuP-T3    | NCI-H2009  | OVCAR-4    |            |
| Caov-3    | HuP-T4    | NCI-H2087  | PC-3       |            |
| CAPAN-1   | HuCCT1    | NCI-H2291  | PANC-03-27 |            |

## Tissue composition

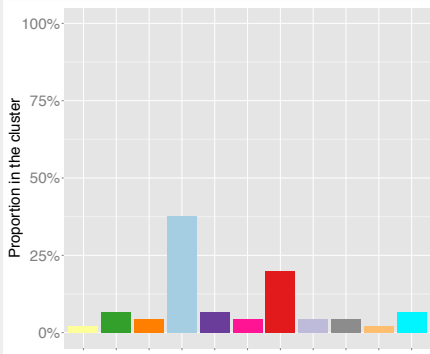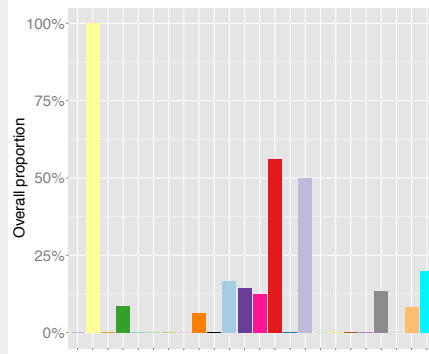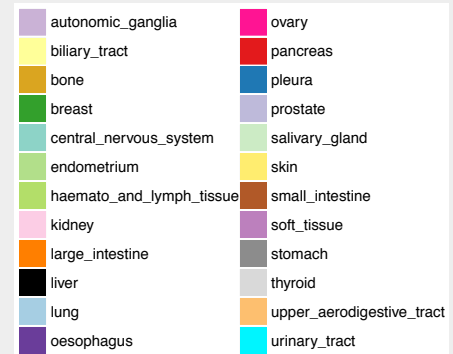

## Molecular profile

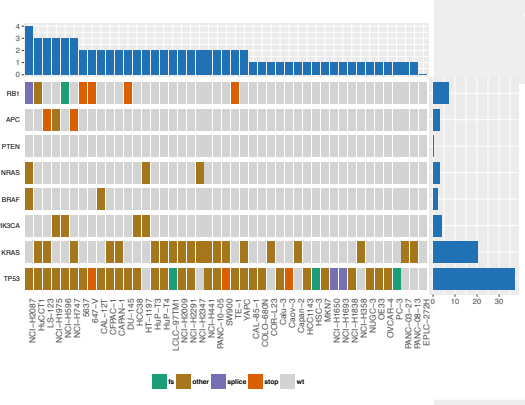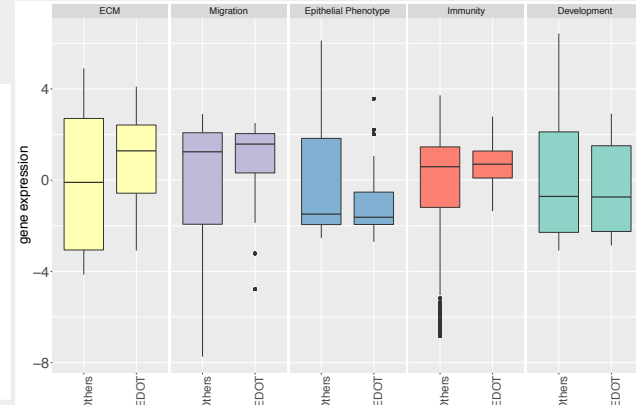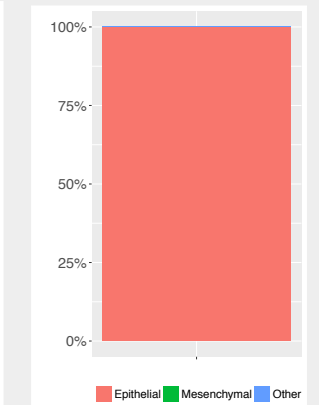

## Drug profile

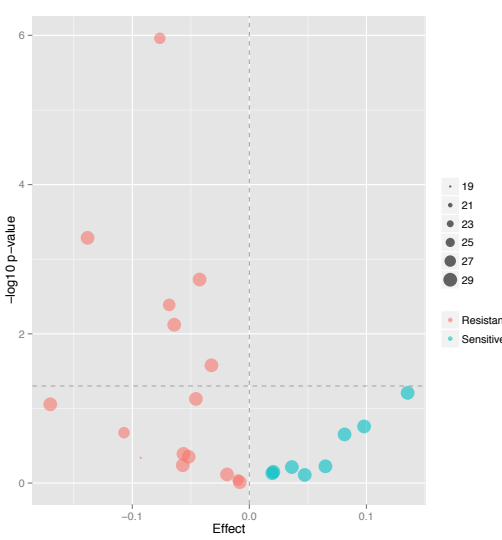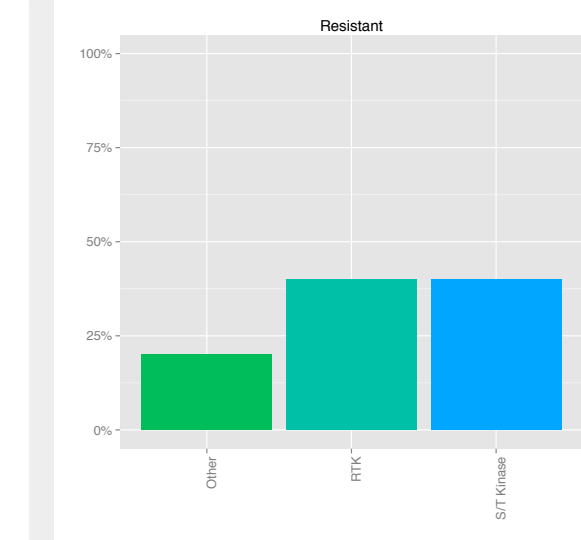

Drugs associated with the cluster (FDR < 0.05)

- L685458 Resistant
- PD0332991 Resistant
- PHA665752 Resistant
- PLX4720 Resistant
- TKI258 Resistant

# Mixed 1 Cluster - CCLE

## Cell lines in the cluster

|         |           |         |
|---------|-----------|---------|
| 639-V   | LU-99A    | TYK-nu  |
| 8505C   | MSTO-211H | UM-UC-3 |
| AM-38   | NCI-H1299 |         |
| CAL-120 | NCI-H2052 |         |
| CAL-62  | NCI-H23   |         |
| HD-MY-Z | NCI-H650  |         |
| HLE     | OVCAR-8   |         |
| IA-LM   | SK-HEP-1  |         |
| KP-4    | SW1573    |         |
| LOXIMVI | T-24      |         |

## Tissue composition

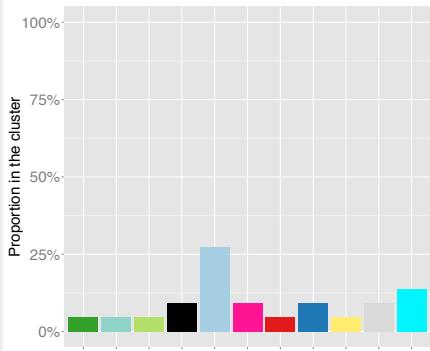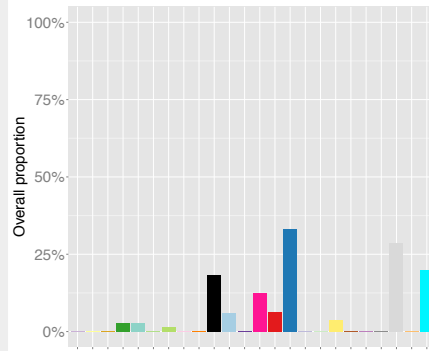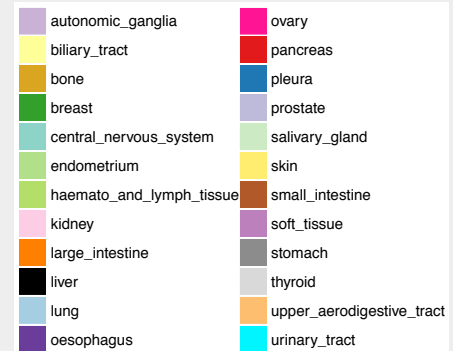

## Molecular profile

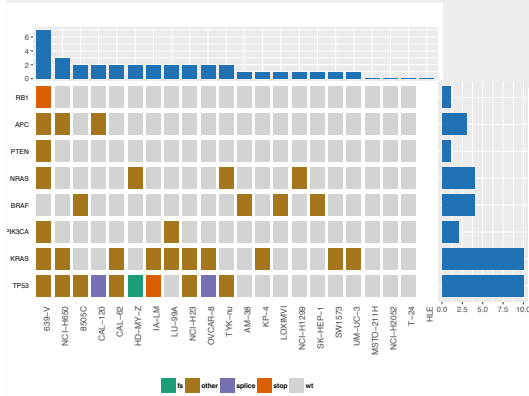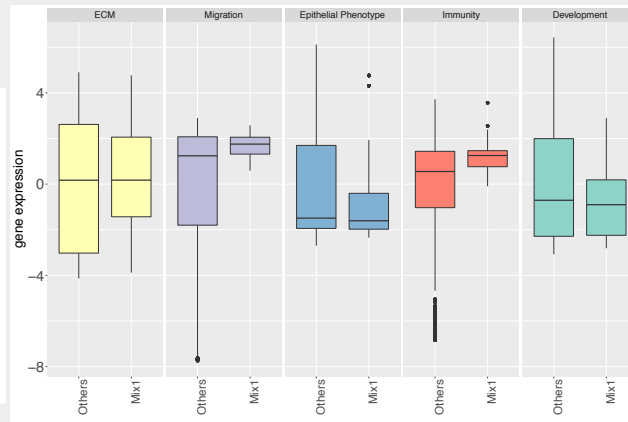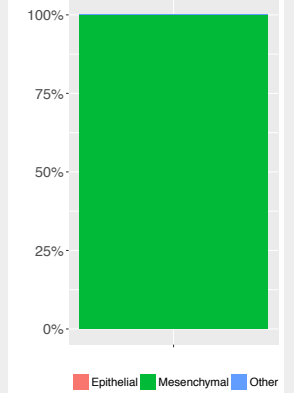

## Drug profile

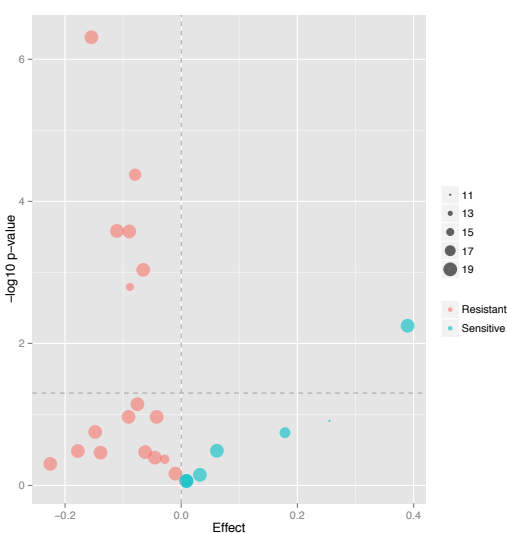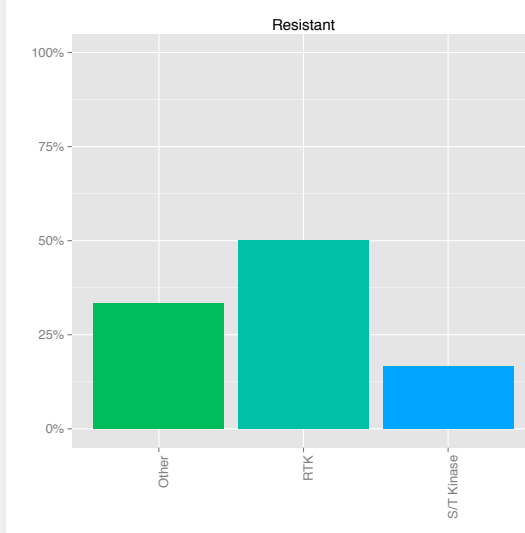

Drugs associated with the cluster (FDR < 0.05)

|            |           |
|------------|-----------|
| ERLOTINIB  | Resistant |
| L685458    | Resistant |
| LAPATINIB  | Resistant |
| LBW242     | Resistant |
| NILOTINIB  | Resistant |
| VANDETANIB | Resistant |

# Haematopoietic and Lymphoid tissue Cluster - CCLE

## Cell lines in the cluster

|         |        |            |            |            |              |          |
|---------|--------|------------|------------|------------|--------------|----------|
| 697     | DEL    | HL-60      | KMS-12-BM  | MHH-CALL-4 | OCI-AML2     | SK-MM-2  |
| A3-KAW  | DOHH-2 | HT         | K052       | MJ         | OPM-2        | SKM-1    |
| AML-193 | Daudi  | HuNS1      | L-363      | MOLT-13    | P12-ICHIKAWA | SR       |
| BL-41   | EB2    | JVM-2      | L-428      | MOLT-16    | P31-FUJ      | ST486    |
| BL-70   | EHEB   | JVM-3      | L-540      | MOLT-4     | PF-382       | SU-DHL-1 |
| BV-173  | EM-2   | KARPAS-299 | LAMA-84    | MONO-MAC-6 | RL           | SUP-T1   |
| CA46    | GDM-1  | KARPAS-422 | LP-1       | NALM-1     | RPMI-8226    | TALL-1   |
| CMK     | HDLM-2 | KASUMI-1   | LOUCY      | NALM-6     | RPMI-8402    | THP-1    |
| CML-T1  | HEL    | KE-37      | MEG-01     | NB4        | RS4-11       | U-266    |
| DB      | HH     | KM-H2      | MHH-CALL-2 | NOMO-1     | Raji         |          |

## Tissue composition

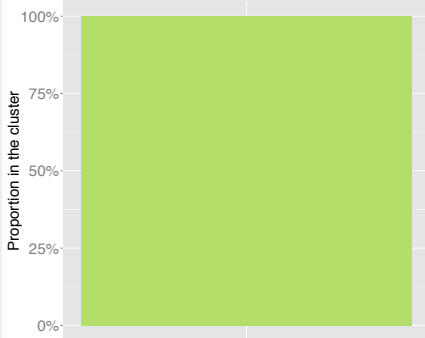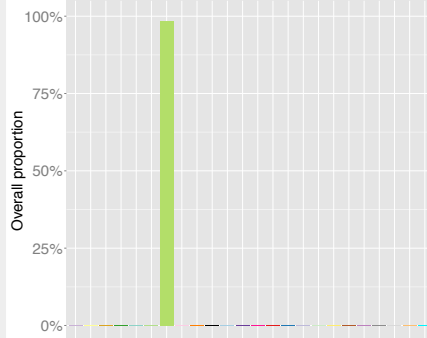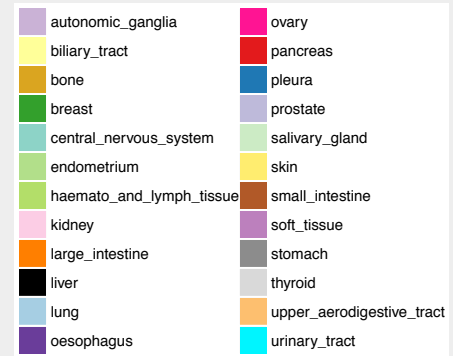

## Molecular profile

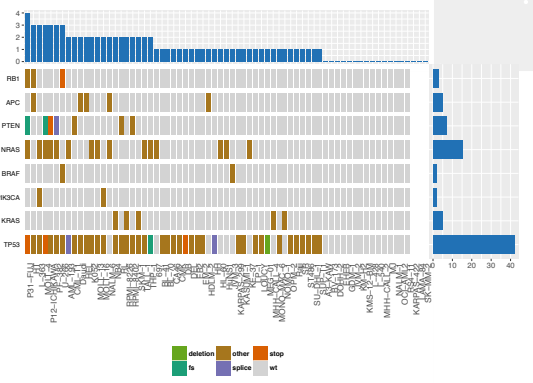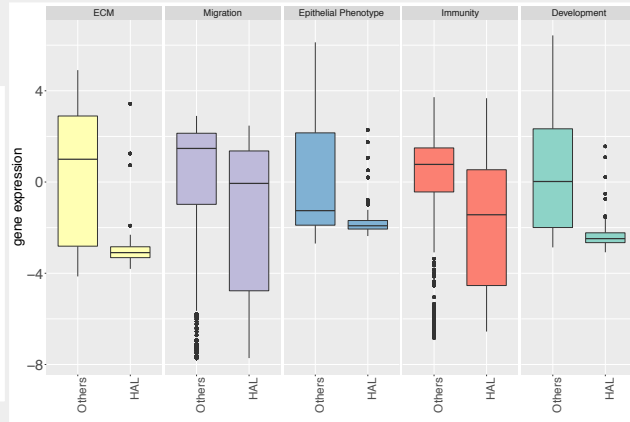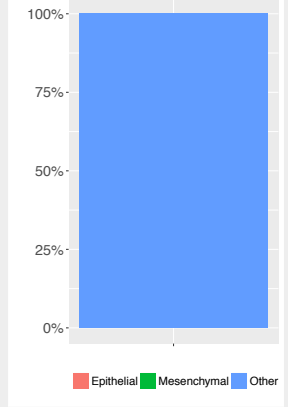

## Drug profile

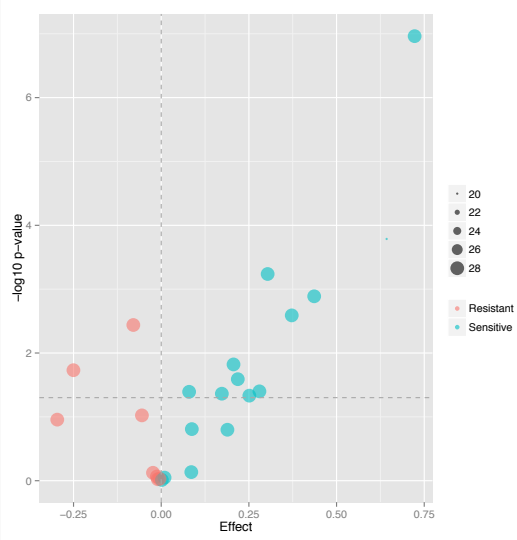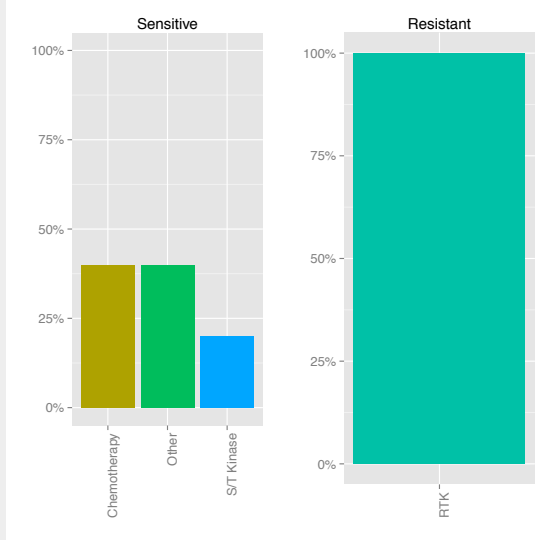

### Drugs associated with the cluster (FDR < 0.05)

|              |           |
|--------------|-----------|
| IRINOTECAN   | Sensible  |
| L685458      | Sensible  |
| PANOBINOSTAT | Sensible  |
| PD0332991    | Sensible  |
| TOPOTECAN    | Sensible  |
| ERLOTINIB    | Resistant |



# Mixed 2 Cluster - CCLE

## Cell lines in the cluster

|          |            |           |           |            |
|----------|------------|-----------|-----------|------------|
| 769-P    | Calu-6     | MKN1      | NCI-H28   | RERF-LC-MS |
| 786-0    | EFO-21     | NCI-H1355 | NCI-H460  | RMG-I      |
| A704     | GCIY       | NCI-H1563 | NCI-H716  | SK-MES-1   |
| A549     | HEC-1      | NCI-H1651 | NCI-H838  | SK-OV-3    |
| ACHN     | HuH-7      | NCI-H1755 | OAW-42    | SNG-M      |
| BHT-101  | IGROV-1    | NCI-H1792 | OC-314    | SNU-449    |
| CAL-51   | KURAMOCHI  | NCI-H1793 | OS-RC-2   | SW1990     |
| CAL-54   | LU-65      | NCI-H2030 | PLC-PRF-5 | SW1710     |
| COR-L105 | LXF-289    | NCI-H2228 | PSN1      | TCCSUP     |
| Calu-1   | MDA-MB-231 | NCI-H2405 | RCC10RGB  | VMRC-RCZ   |

## Tissue composition

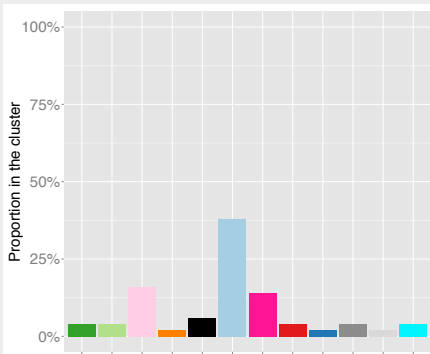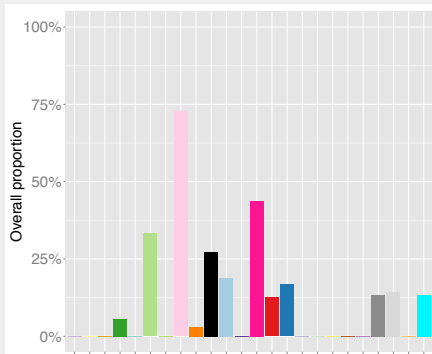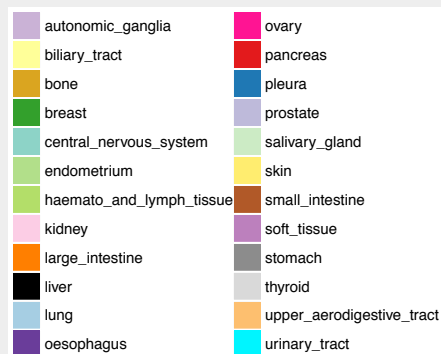

## Molecular profile

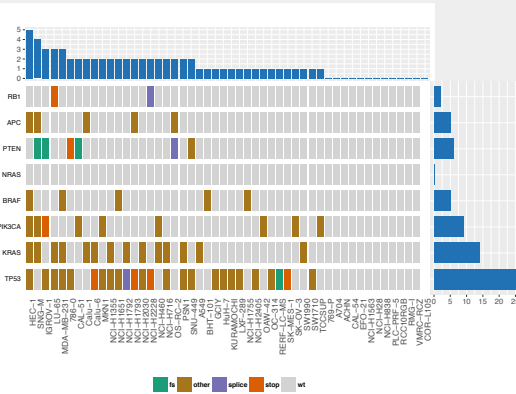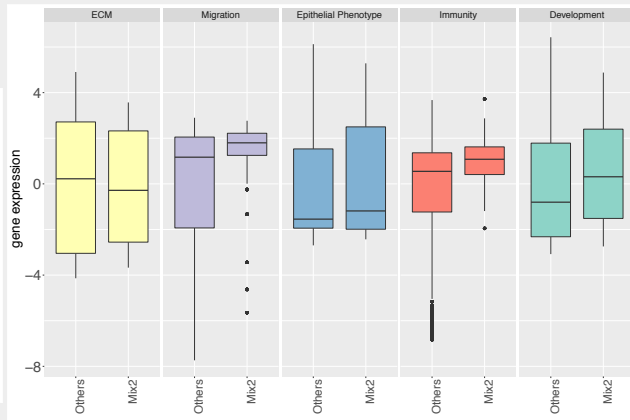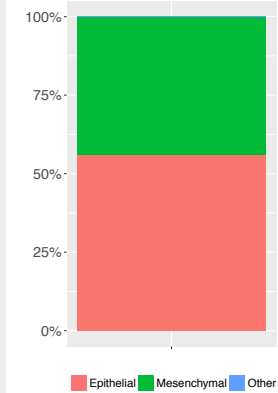

## Drug profile

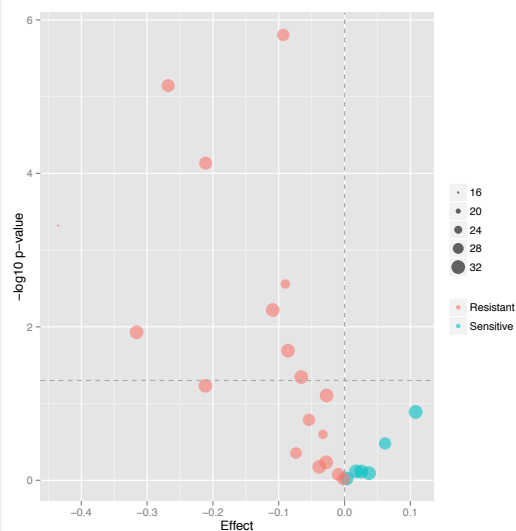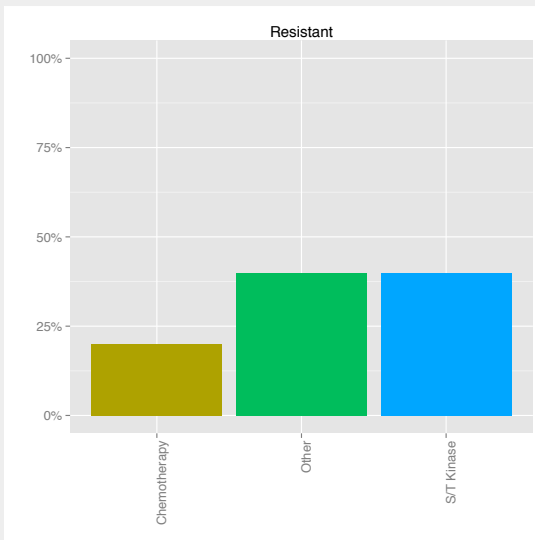

Drugs associated with the cluster (FDR < 0.05)

|              |           |
|--------------|-----------|
| AZD6244      | Resistant |
| IRINOTECAN   | Resistant |
| L685458      | Resistant |
| NILOTINIB    | Resistant |
| PANOBINOSTAT | Resistant |

# Glioma and Sarcoma Cluster - CCLE

## Cell lines in the cluster

|                                                                                                    |                                                                                             |                                                                                              |                                                                                                                    |                                                                                              |                                                                                                        |                                                                                            |
|----------------------------------------------------------------------------------------------------|---------------------------------------------------------------------------------------------|----------------------------------------------------------------------------------------------|--------------------------------------------------------------------------------------------------------------------|----------------------------------------------------------------------------------------------|--------------------------------------------------------------------------------------------------------|--------------------------------------------------------------------------------------------|
| 8-MG-BA<br>A498<br>A172<br>BCPAP<br>BFTC-909<br>BT-549<br>Becker<br>CAS-1<br>CCF-STTG1<br>CGTH-W-1 | CHP-212<br>DBTRG-05MG<br>DK-MG<br>Daoy<br>ESS-1<br>FTC-133<br>GAMG<br>GCT<br>GI-1<br>GMS-10 | H4<br>HCC1395<br>HOS<br>HT-1080<br>Hs-578-T<br>HuH-28<br>IST-MES1<br>J82<br>KALS-1<br>KNS-42 | KNS-81-FD<br>KP-N-S19s<br>KS-1<br>LCLC-103H<br>MDA-MB-157<br>MG-63<br>MOG-G-CCM<br>MOG-G-UVV<br>MPP-89<br>NCI-H226 | NCI-H2452<br>NH-6<br>NMC-G1<br>ONS-76<br>RD<br>RH-18<br>RPMI-7951<br>S-117<br>SF295<br>SF126 | SJSA-1<br>SK-LMS-1<br>SK-LU-1<br>SK-N-AS<br>SNB19<br>SNU-387<br>SNU-423<br>SNU-475<br>SW1088<br>SW1783 | Saos-2<br>TI-73<br>T98G<br>TE-8<br>U-118-MG<br>U-2-OS<br>U251<br>U-87-MG<br>YH-13<br>YKG-1 |
|----------------------------------------------------------------------------------------------------|---------------------------------------------------------------------------------------------|----------------------------------------------------------------------------------------------|--------------------------------------------------------------------------------------------------------------------|----------------------------------------------------------------------------------------------|--------------------------------------------------------------------------------------------------------|--------------------------------------------------------------------------------------------|

## Tissue composition

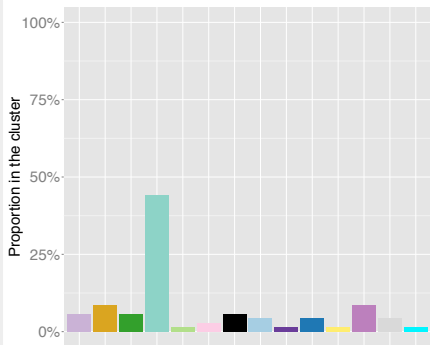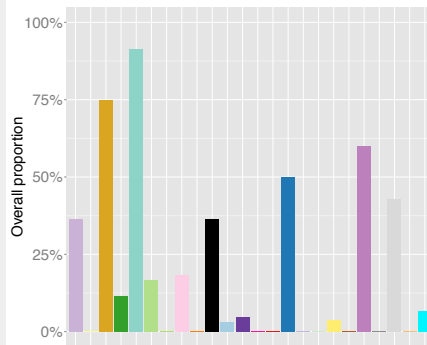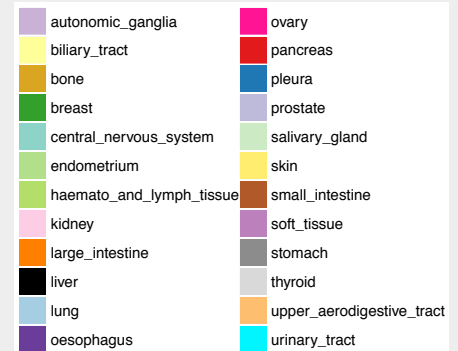

## Molecular profile

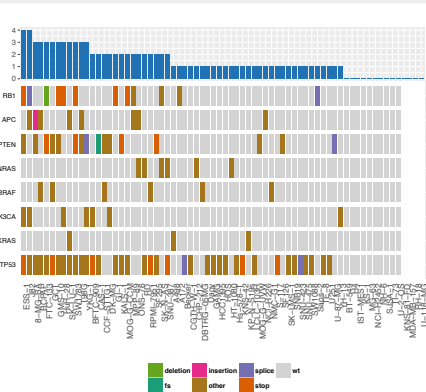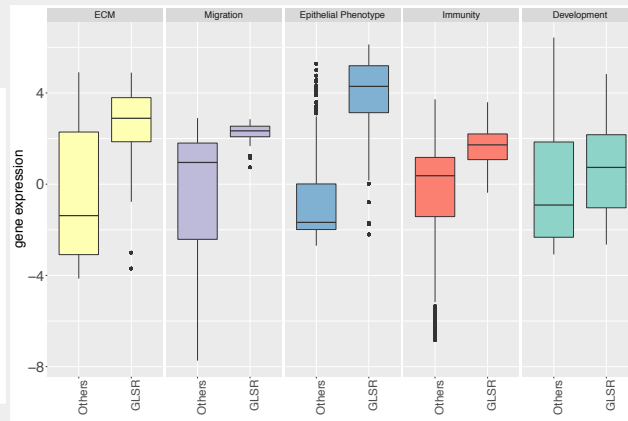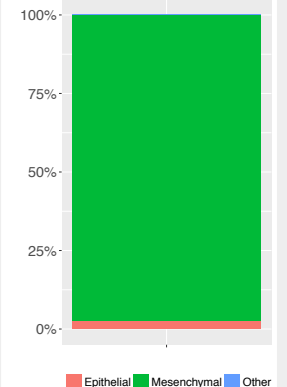

## Drug profile

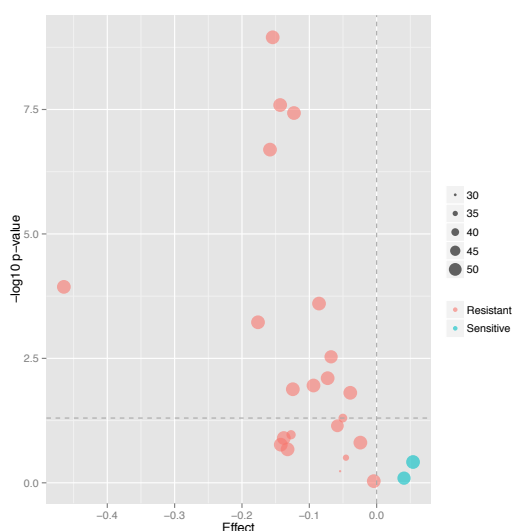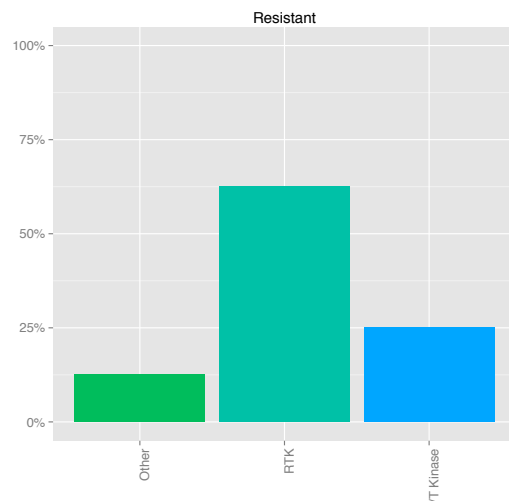

### Drugs associated with the cluster (FDR < 0.05)

|              |           |
|--------------|-----------|
| AZD0530      | Resistant |
| ERLOTINIB    | Resistant |
| LAPATINIB    | Resistant |
| PANOBINOSTAT | Resistant |
| PD0325901    | Resistant |
| PLX4720      | Resistant |
| SORAFENIB    | Resistant |
| VANDETANIB   | Resistant |

# Mixed 3 Cluster - CCLE

## Cell lines in the cluster

|              |              |            |           |
|--------------|--------------|------------|-----------|
| A204         | ECC12        | MIA-PaCa-2 | RKO       |
| A673         | G-401        | NB1        | SBC-5     |
| A2780        | HGC-27       | NCI-H1155  | SHP-77    |
| AN3-CA       | HUTU-80      | NCI-H1703  | SIMA      |
| CHL-1        | KP-N-RT-BM-1 | NCI-H2227  | SJRH30    |
| COLO-320-HSR | KP-N-YN      | NCI-H446   | SK-N-DZ   |
| CPC-N        | MES-SA       | NCI-H522   | SK-N-FI   |
| D-283MED     | MFE-296      | NCI-H524   | SK-UT-1   |
| DMS-114      | MHH-ES-1     | NCI-H661   | NCI-SNU-1 |
| DMS-273      | MHH-NB-11    | NCI-H82    |           |

## Tissue composition

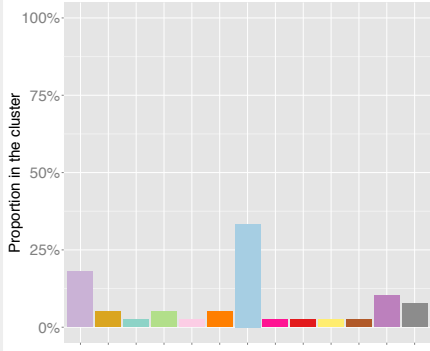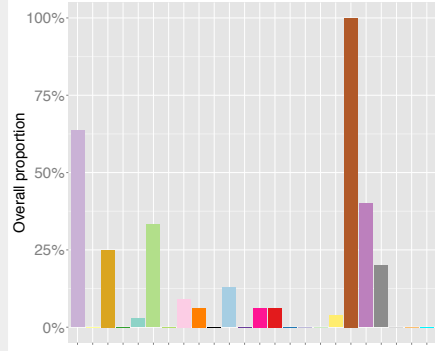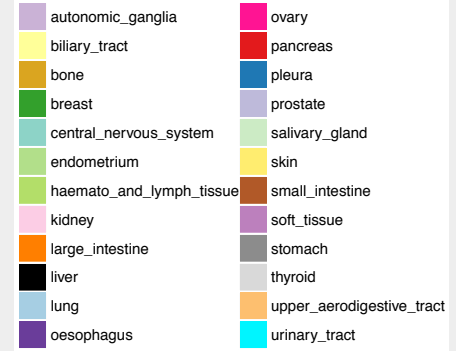

## Molecular profile

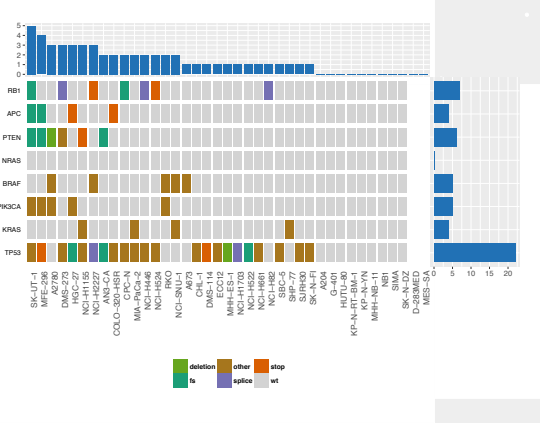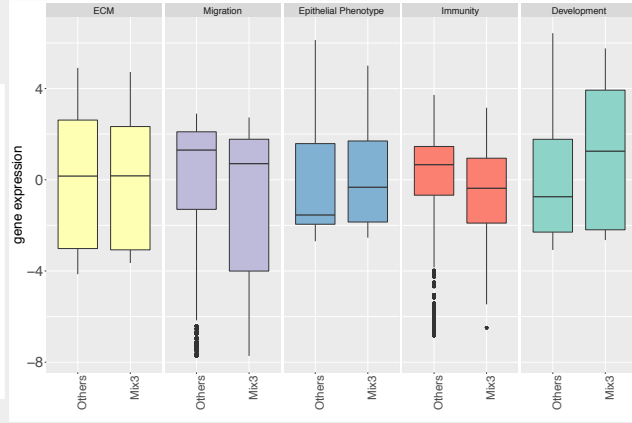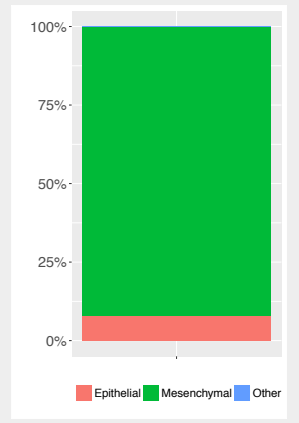

## Drug profile

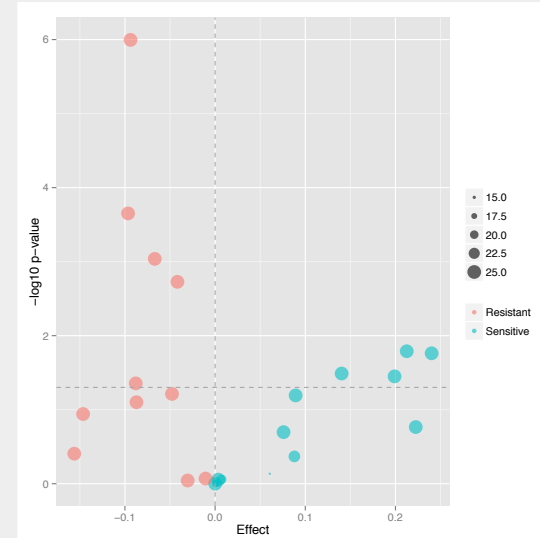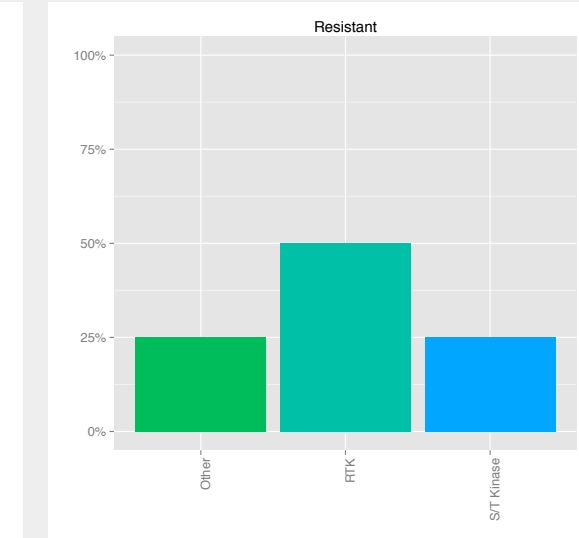

Drugs associated with the cluster (FDR < 0.05)

- ERLOTINIB Resistant
- LBW242 Resistant
- PHA665752 Resistant
- PLX4720 Resistant

# Aerodigestive tract Cluster - CCLE

## Cell lines in the cluster

|            |          |           |        |          |
|------------|----------|-----------|--------|----------|
| A253       | HCC1806  | KYSE-450  | SCC-25 | VM-CUB-1 |
| BFTC-905   | HSC-2    | KYSE-510  | SCC-4  |          |
| BHY        | HSC-4    | KYSE-520  | SCC-9  |          |
| BxPC-3     | KNS-62   | KYSE-70   | SW780  |          |
| CAL-27     | KU-19-19 | LC-1F     | TE-10  |          |
| CAL-33     | KYSE-140 | NCI-H1666 | TE-11  |          |
| Detroit562 | KYSE-150 | NCI-H292  | TE-15  |          |
| EC-GI-10   | KYSE-180 | PC-14     | TE-5   |          |
| EFO-27     | KYSE-270 | RT-112    | TE-6   |          |
| FADU       | KYSE-410 | SCC-15    | TE-9   |          |

## Tissue composition

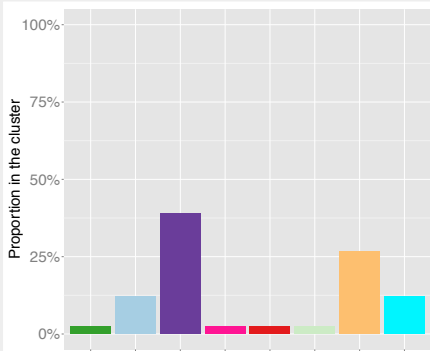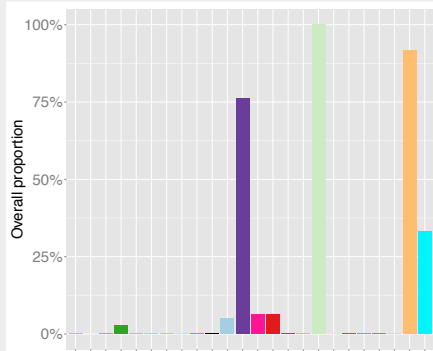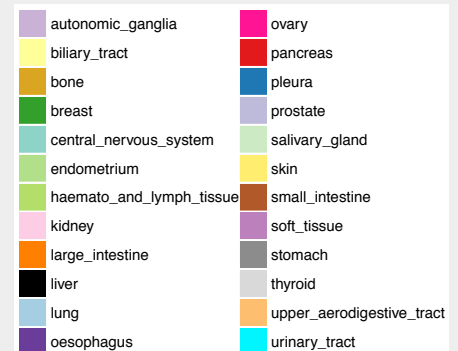

## Molecular profile

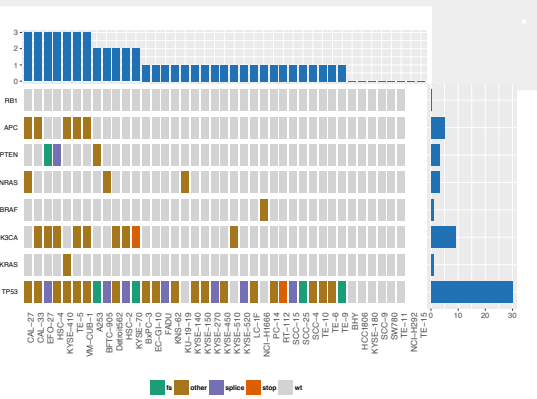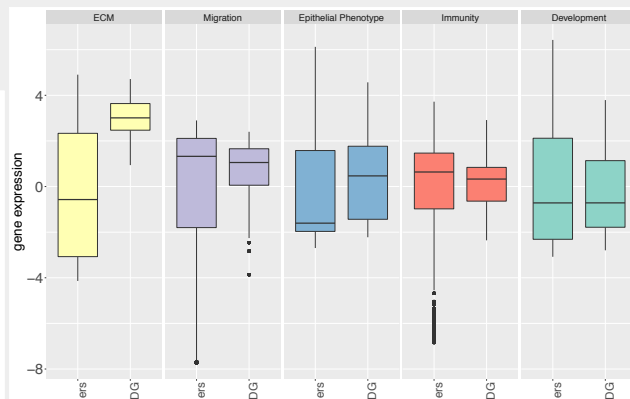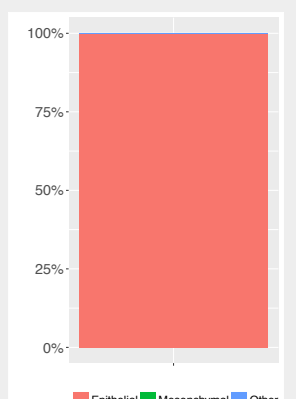

## Drug profile

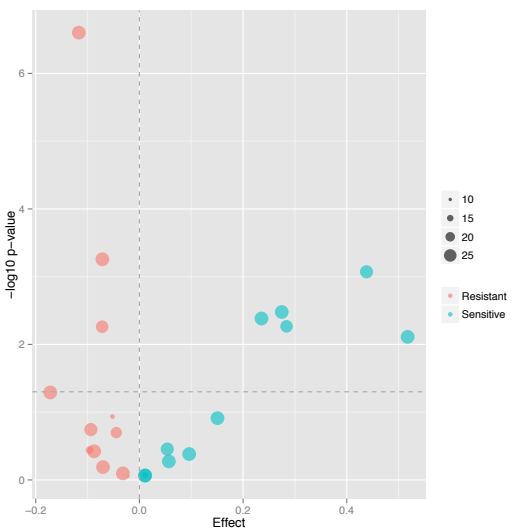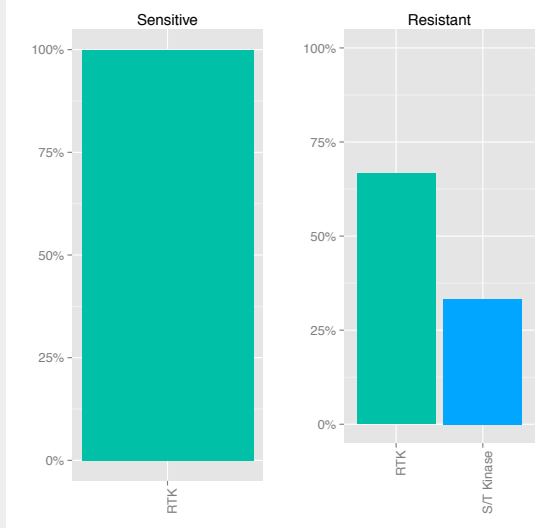

### Drugs associated with the cluster (FDR < 0.05)

|            |           |
|------------|-----------|
| AZD0530    | Sensible  |
| ERLOTINIB  | Sensible  |
| LAPATINIB  | Sensible  |
| VANDETANIB | Sensible  |
| CRIZOTINIB | Resistant |
| PLX4720    | Resistant |
| SORAFENIB  | Resistant |

# Skin Cluster - CCLE

## Cell lines in the cluster

|          |           |           |
|----------|-----------|-----------|
| A375     | IGR-1     | SK-MEL-3  |
| A101D    | IPC-298   | SK-MEL-30 |
| A2058    | MEL-HO    | SK-MEL-5  |
| C32      | MEL-JUSO  | UACC-257  |
| COLO-741 | Malme-3M  | UACC-62   |
| COLO-792 | Mewo      | WM-115    |
| COLO-679 | RVH-421   |           |
| COLO-800 | SK-MEL-2  |           |
| G-361    | SK-MEL-24 |           |
| HT-144   | SK-MEL-28 |           |

## Tissue composition

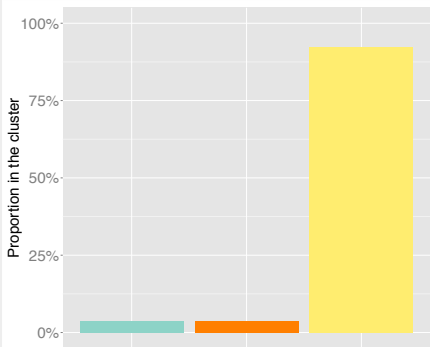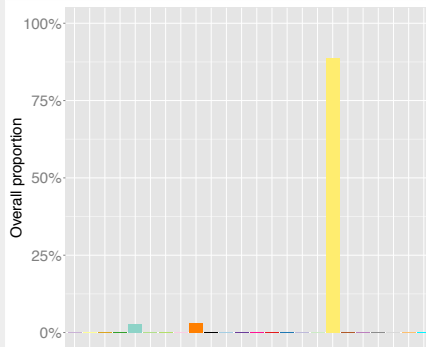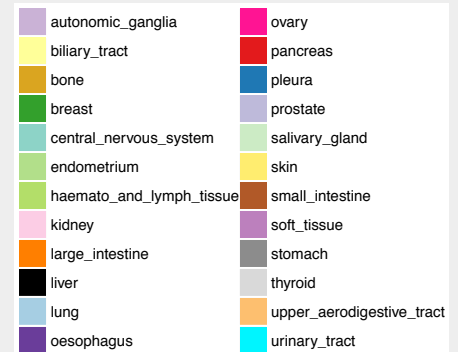

## Molecular profile

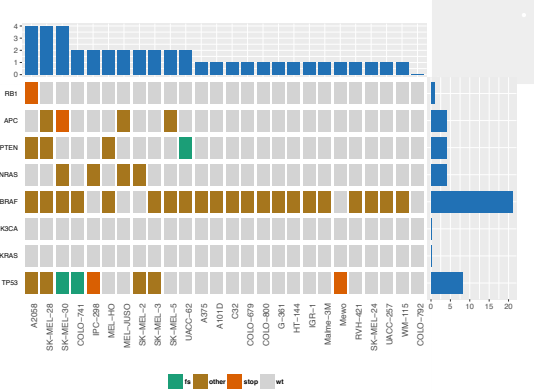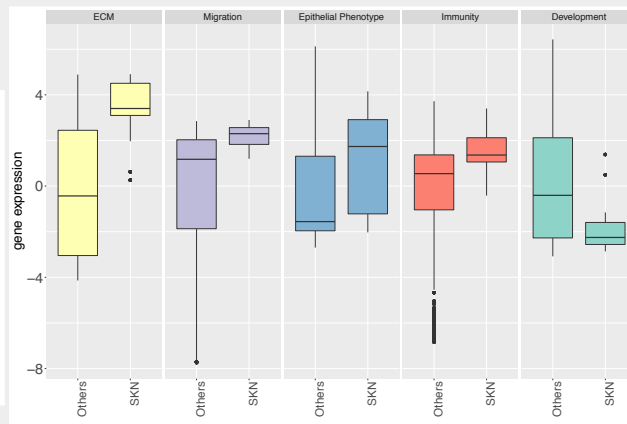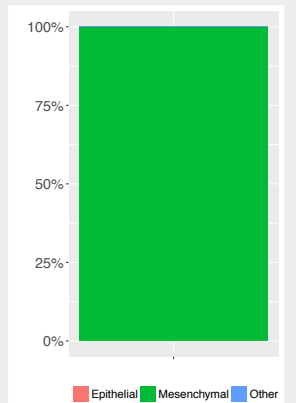

## Drug profile

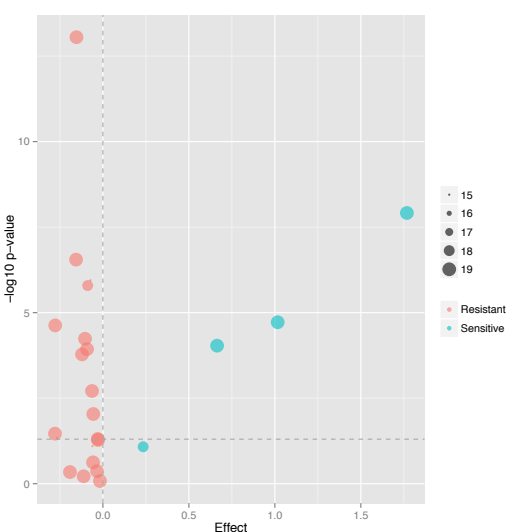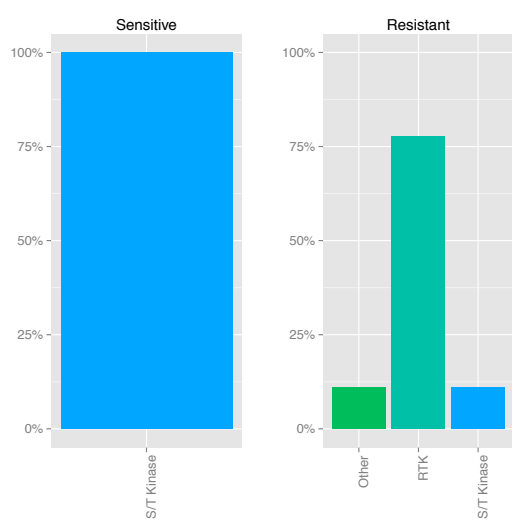

### Drugs associated with the cluster (FDR < 0.05)

|            |           |
|------------|-----------|
| AZD6244    | Sensible  |
| PD0325901  | Sensible  |
| PLX4720    | Sensible  |
| AZD0530    | Resistant |
| CRIZOTINIB | Resistant |
| ERLOTINIB  | Resistant |
| L685458    | Resistant |
| LAPATINIB  | Resistant |
| PD0332991  | Resistant |
| SORAFENIB  | Resistant |
| TAE684     | Resistant |
| VANDETANIB | Resistant |

# Breast Cluster - CCLE

## Cell lines in the cluster

|           |                |            |          |
|-----------|----------------|------------|----------|
| ABC-1     | HCC1599        | MDA-MB-361 | OAW-28   |
| BT-20     | HCC1937        | MDA-MB-415 | T47D     |
| CAL-148   | HCC1954        | MDA-MB-453 | UACC-812 |
| CAMA-1    | HCC2157        | MDA-MB-468 | ZR-75-30 |
| Caov-4    | HCC2218        | NCI-H1395  |          |
| ChaGo-K-1 | HCC70          | NCI-H1437  |          |
| EFM-19    | HT-1376        | NCI-H1573  |          |
| EVSA-T    | MCF7           | NCI-H2126  |          |
| HCC1187   | MDA-MB-134-VI  | NCI-H2342  |          |
| HCC1419   | MDA-MB-175-VII | OVCAR-3    |          |

## Tissue composition

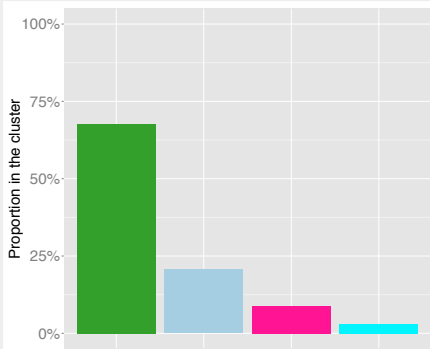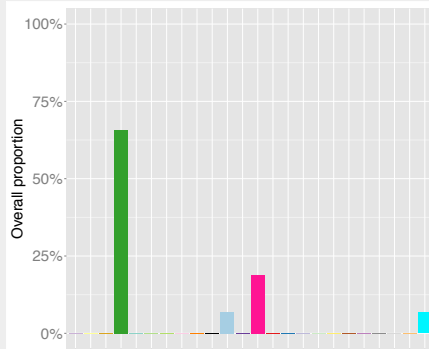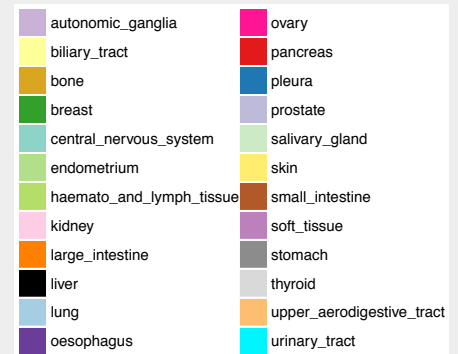

## Molecular profile

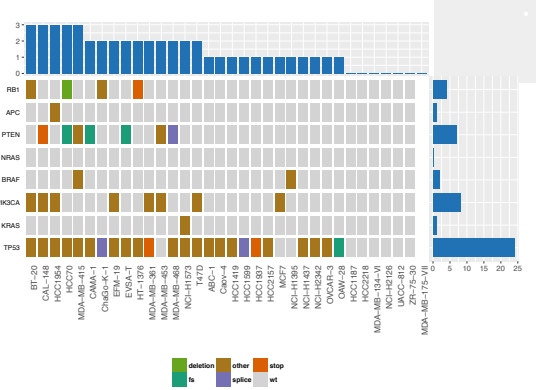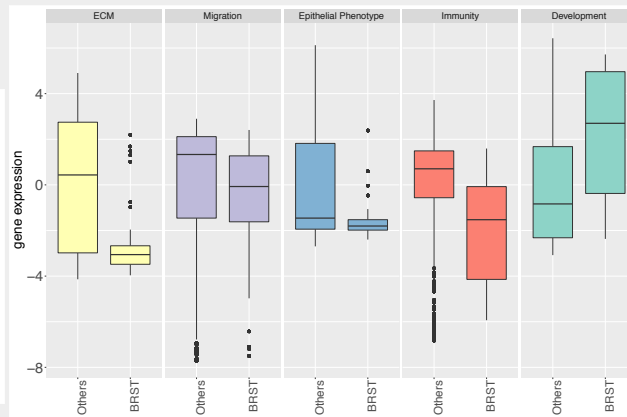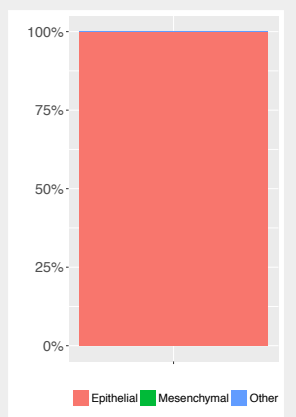

## Drug profile

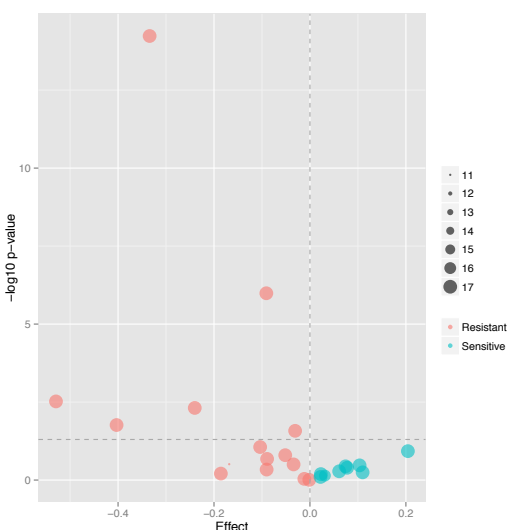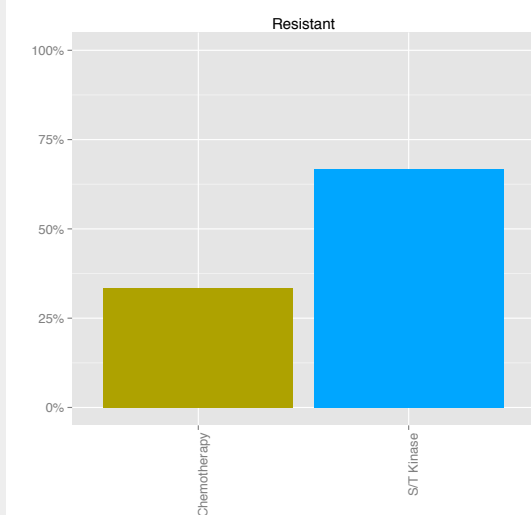

Drugs associated with the cluster (FDR < 0.05)

- AZD6244 Resistant
- PLX4720 Resistant
- TOPOTECAN Resistant

# SCLC Cluster - GDSC

## Cell lines in the cluster

|          |                 |           |          |
|----------|-----------------|-----------|----------|
| 22RV1    | DMS-79          | NCI-H146  | NCI-H520 |
| BEN      | HUH-6-clone5    | NCI-H1618 | NCI-H526 |
| C2BBE1   | HuH-7           | NCI-H1930 | NCI-H727 |
| C3A      | LK-2            | NCI-H2029 | NCI-H810 |
| COLO-668 | LNCaP-Clone-FGC | NCI-H2081 | NCI-H889 |
| COR-L279 | MDA-MB-134-VI   | NCI-H209  | SCLC-21H |
| COR-L51  | NCI-H1048       | NCI-H2141 | TT       |
| COR-L88  | NCI-H1092       | NCI-H2171 |          |
| DMS-153  | NCI-H1105       | NCI-H2196 |          |
| DMS-53   | NCI-H1436       | NCI-H510A |          |

## Tissue composition

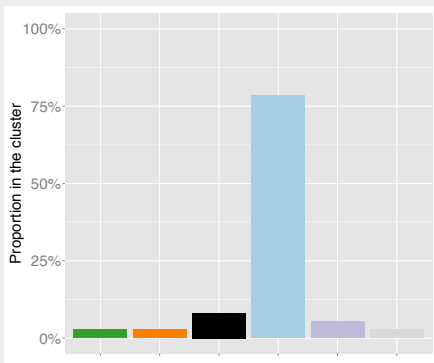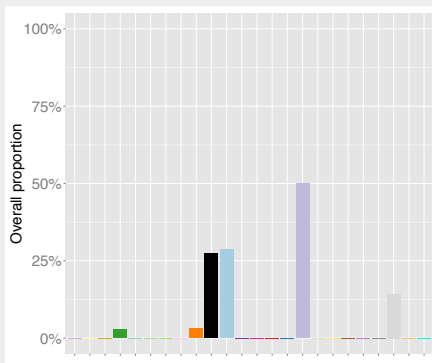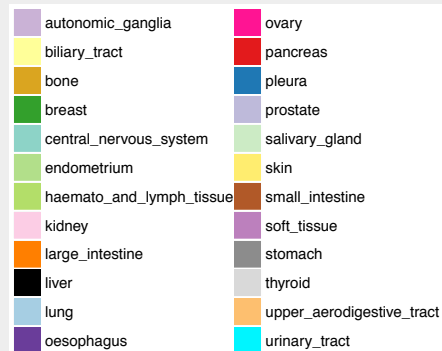

## Molecular profile

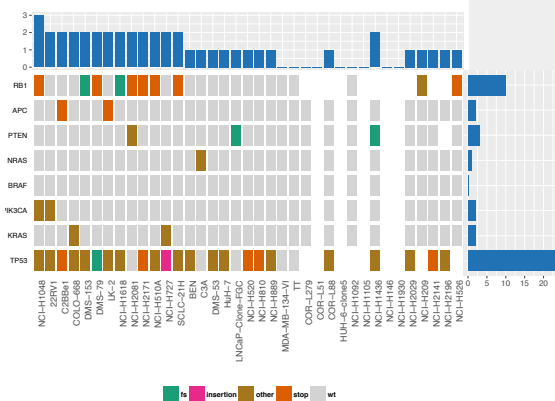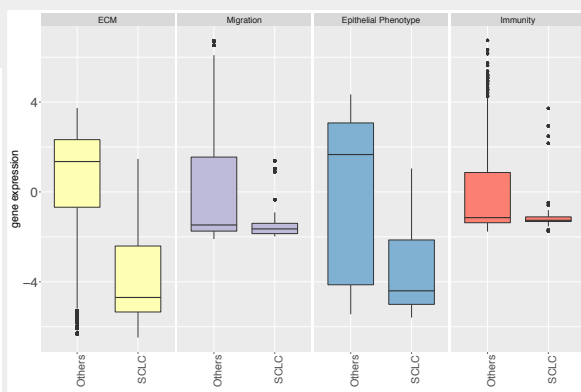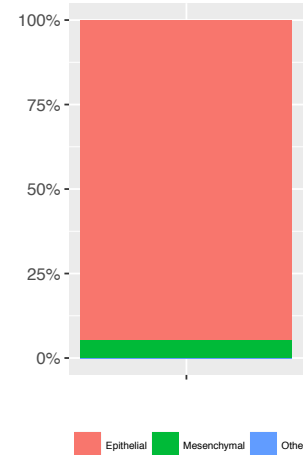

## Drug profile

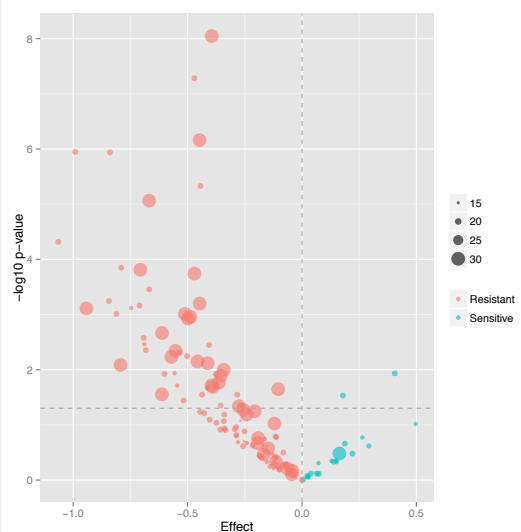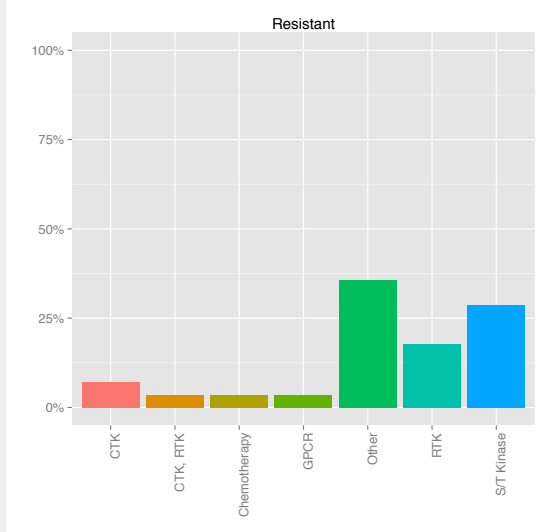

## Drugs associated with the cluster (FDR < 0.05)

|                       |           |
|-----------------------|-----------|
| SUNITINIB             | Resistant |
| MG-132                | Resistant |
| CYCLOPAMINE           | Resistant |
| AZ628                 | Resistant |
| CRIZOTINIB            | Resistant |
| Z-LLNLE-CHO-DASATINIB | Resistant |
| WH-4-023              | Resistant |
| BMS-536924            | Resistant |
| JW-7-52-1             | Resistant |
| BORTEZOMIB            | Resistant |
| XMD8-85               | Resistant |
| LAPATINIB             | Resistant |
| GEMCITABINE           | Resistant |
| MIDOSTAURIN           | Resistant |
| CHIR-99021            | Resistant |
| AP-24534              | Resistant |
| AZD6482               | Resistant |
| PF-562271             | Resistant |
| FTI-277               | Resistant |
| SHIKONIN              | Resistant |
| EMBELIN               | Resistant |
| OBATOCLAX-MESYLATE    | Resistant |
| BEXAROTENE            | Resistant |
| TIPIFARNIB            | Resistant |
| RDEA119               | Resistant |
| CI-1040               | Resistant |
| PD0325901             | Resistant |

# Gastrointestinal tract Cluster - GDSC

## Cell lines in the cluster

|          |         |            |           |
|----------|---------|------------|-----------|
| 23132-87 | HPAF-II | MKN45      | SNU-C1    |
| AGS      | HT-29   | NCI-H508   | SW1116    |
| CFPAC-1  | HT55    | NCI-H747   | SW1417    |
| COLO-205 | HuP-T4  | NCI-N87    | SW1463    |
| COLO-678 | KATOIII | OE19       | SW837     |
| CW-2     | KM12    | OE33       | SW948     |
| CAPAN-1  | LS-1034 | PANC-08-13 | T84       |
| Capan-2  | LS-411N | RCM-1      | TGBC11TKB |
| DV-90    | LS-513  | SK-CO-1    | YAPC      |
| HCT-15   | LoVo    | NCI-SNU-16 |           |

## Tissue composition

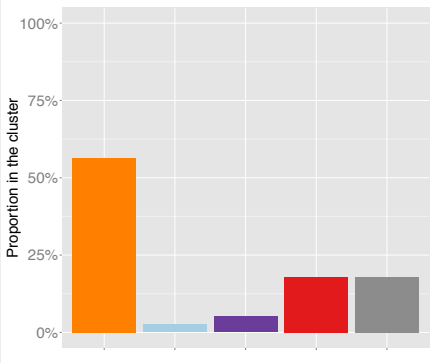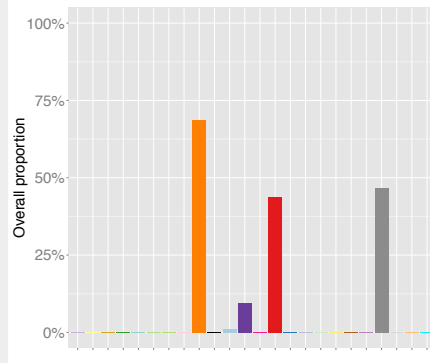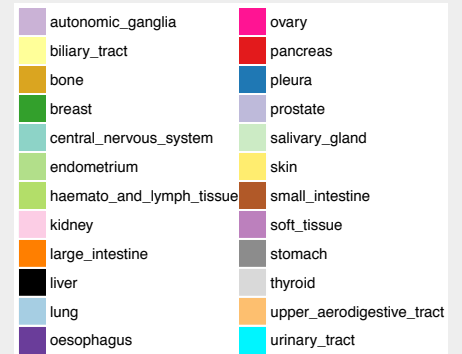

## Molecular profile

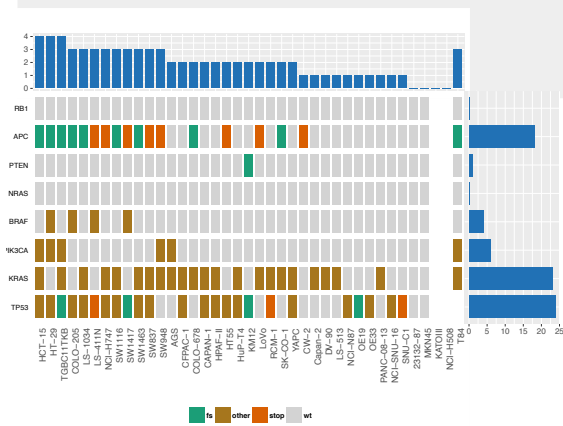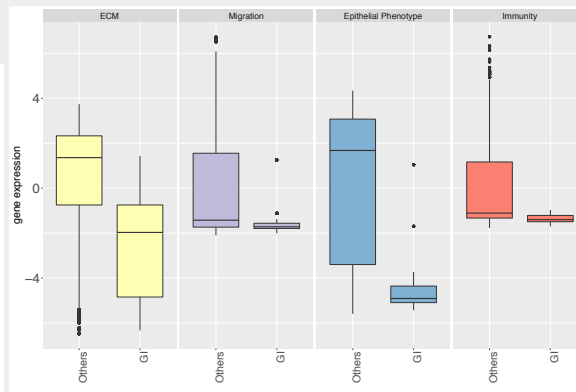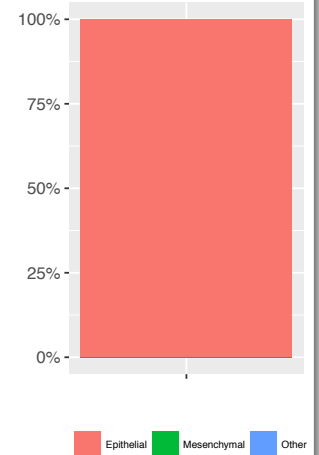

## Drug profile

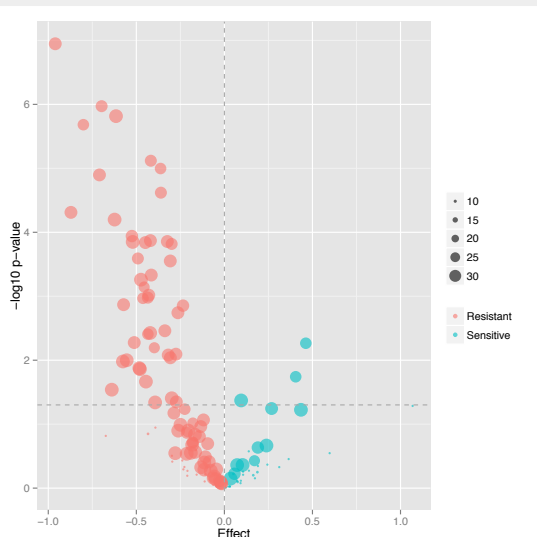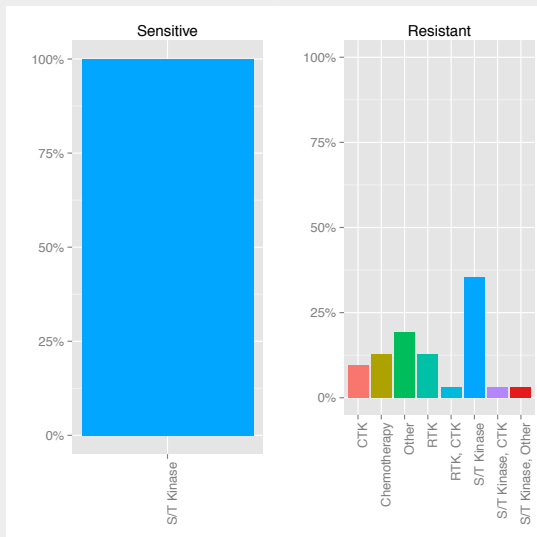

## Drugs associated with the cluster (FDR < 0.05)

|                    |           |
|--------------------|-----------|
| PD0325901          | Sensible  |
| AP-24534           | Resistant |
| AZD6482            | Resistant |
| DMOG               | Resistant |
| IPA-3              | Resistant |
| PAZOPANIB          | Resistant |
| CAMPTOTHECIN-WT5I  | Resistant |
| VINBLASTINE        | Resistant |
| CISPLATIN          | Resistant |
| DOCETAXEL          | Resistant |
| ATRA               | Resistant |
| NILOTINIB          | Resistant |
| TEMSIROLIMUS       | Resistant |
| AZD-2281           | Resistant |
| BOSUTINIB          | Resistant |
| AXITINIB           | Resistant |
| CEP-701            | Resistant |
| AMG-706            | Resistant |
| ELESCLMOM          | Resistant |
| PLX4720            | Resistant |
| BX-795             | Resistant |
| SL-0101-1          | Resistant |
| BI-D1870           | Resistant |
| JNK-INHIBITOR-VIII | Resistant |
| 681640             | Resistant |
| PD-173074          | Resistant |
| ZM-447439          | Resistant |
| RO-3306            | Resistant |
| PD032991           | Resistant |
| NVP-BE2235         | Resistant |
| GDC0941            | Resistant |
| AZD8055            | Resistant |



# Endodermal origin Cluster - GDSC

## Cell lines in the cluster

647-V NCI-H2009  
 CAL-12T NCI-H2087  
 COR-L23 NCI-H2291  
 HT-1197 NCI-H2347  
 HT-1376 NCI-H358  
 HuCCT1 NCI-H441  
 LCLC-97TM1 PANC-03-27  
 LS-123 PANC-10-05  
 MKN7  
 NCI-H1838

## Tissue composition

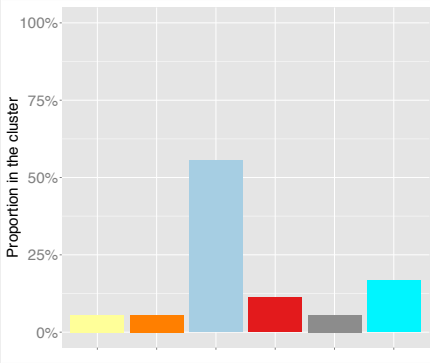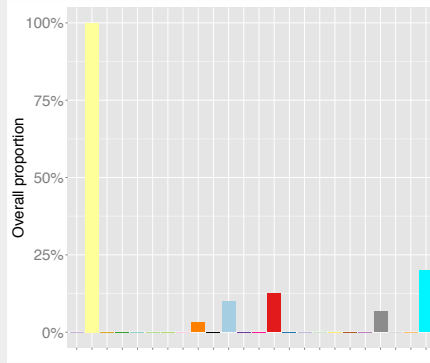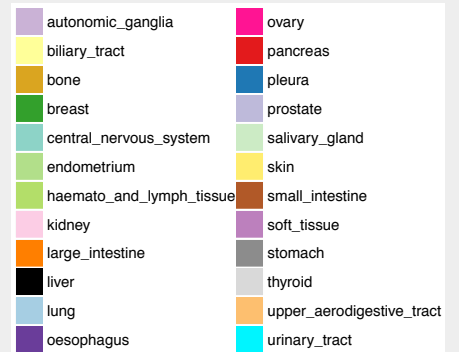

## Molecular profile

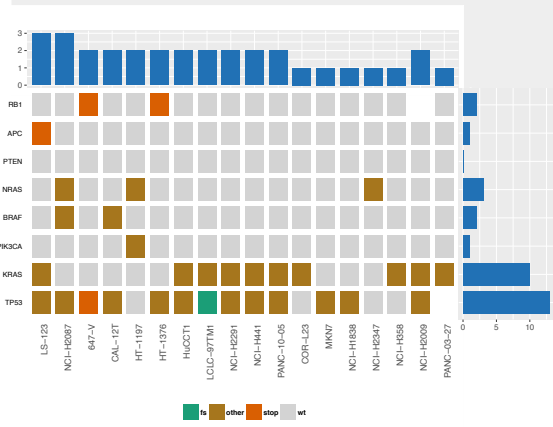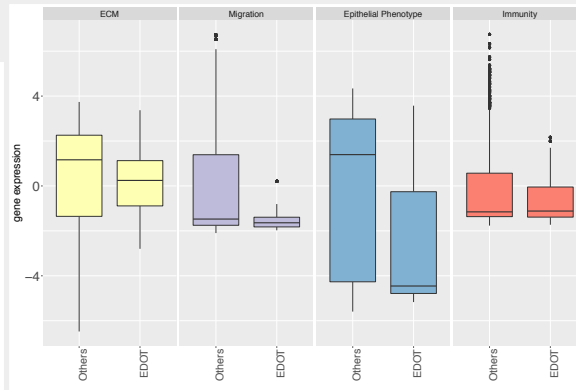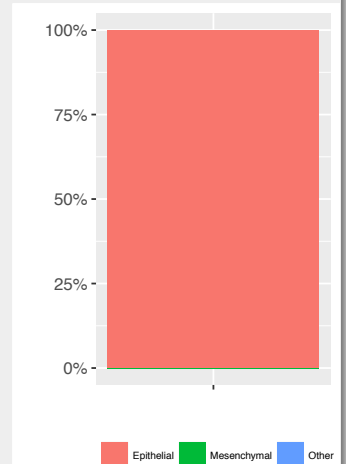

## Drug profile

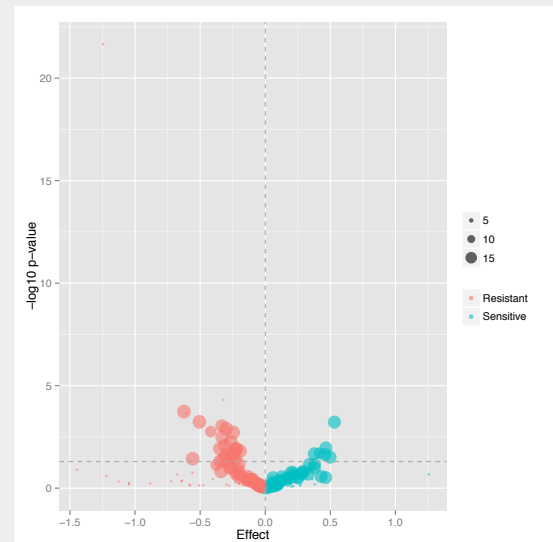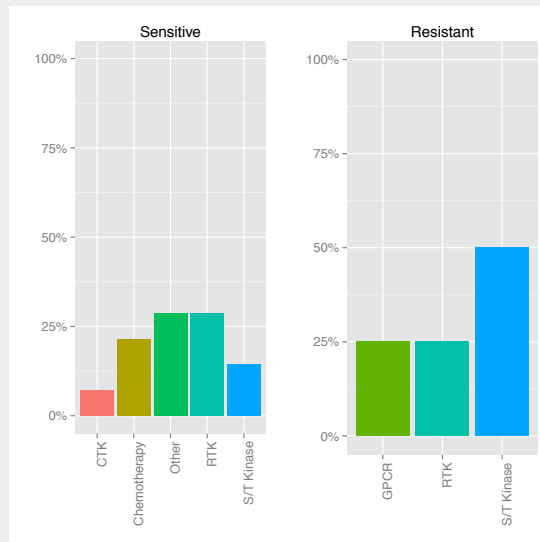

## Drugs associated with the cluster (FDR < 0.05)

|                   |           |
|-------------------|-----------|
| SUNITINIB         | Sensible  |
| CRIZOTINIB        | Sensible  |
| XMD8-85           | Sensible  |
| DMOG              | Sensible  |
| PAC-1             | Sensible  |
| IPA-3             | Sensible  |
| BAY-61-3606       | Sensible  |
| AICAR             | Sensible  |
| CAMPTOTHECIN-WT5I | Sensible  |
| METHOTREXATE      | Sensible  |
| ATRA              | Sensible  |
| CEFTINIB          | Sensible  |
| ABT-263           | Sensible  |
| VORINOSTAT        | Sensible  |
| NILOTINIB         | Sensible  |
| TEMSIROLIMUS      | Sensible  |
| AZD-2281          | Sensible  |
| ABT-888           | Sensible  |
| BOSUTINIB         | Sensible  |
| LENALIDOMIDE      | Sensible  |
| AZD762            | Sensible  |
| CEP-701           | Sensible  |
| VX-702            | Sensible  |
| SL-0101-1         | Sensible  |
| 681640            | Sensible  |
| PD-173074         | Sensible  |
| ZM-447439         | Sensible  |
| PD0332991         | Sensible  |
| S6590885          | Sensible  |
| KIN001-135        | Resistant |
| LAPATINIB         | Resistant |
| NSC-87877         | Resistant |
| BICALUTAMIDE      | Resistant |
| FTI-277           | Resistant |
| FH535             | Resistant |
| BMS-754807        | Resistant |
| BRYOSTATIN-1      | Resistant |
| DOCETAXEL         | Resistant |
| AZD-2281          | Resistant |
| AXITINIB          | Resistant |
| GW-441756         | Resistant |
| VX-702            | Resistant |
| MK-2206           | Resistant |

# Mixed 1 Cluster - GDSC

## Cell lines in the cluster

|         |           |            |           |           |         |
|---------|-----------|------------|-----------|-----------|---------|
| 639-V   | EFO-21    | LU-99A     | NCI-H1975 | RKO       | TE-8    |
| 8505C   | ESS-1     | LXF-289    | NCI-H2052 | SK-HEP-1  | TYK-nu  |
| AM-38   | FTC-133   | MDA-MB-231 | NCI-H226  | SK-LMS-1  | UM-UC-3 |
| BCPAP   | HD-MY-Z   | MIA-PaCa-2 | NCI-H23   | SK-LU-1   |         |
| BHT-101 | HLE       | MKN1       | NCI-H2452 | SK-UT-1   |         |
| BT-549  | IA-LM     | MPP-89     | NCI-H596  | NCI-SNU-1 |         |
| CAL-120 | J82       | MSTO-211H  | NCI-H650  | SW1573    |         |
| CAL-62  | KP-4      | NCI-H1299  | OC-314    | SW900     |         |
| Calu-1  | KURAMOCHI | NCI-H1703  | ONS-76    | T-24      |         |
| Calu-6  | LOXIMVI   | NCI-H1792  | OVCAR-8   | TCCSUP    |         |

## Tissue composition

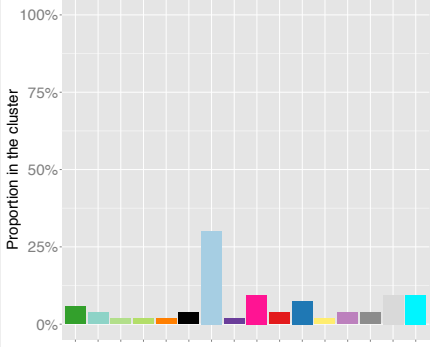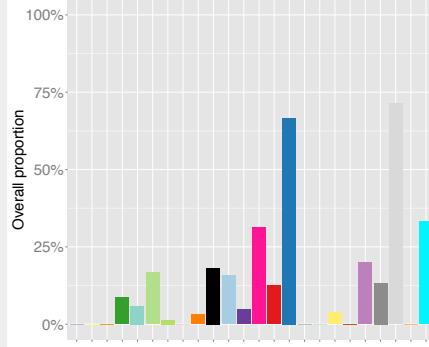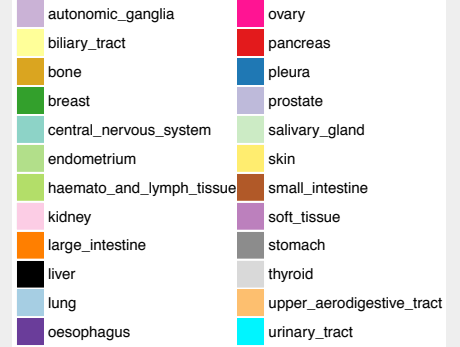

## Molecular profile

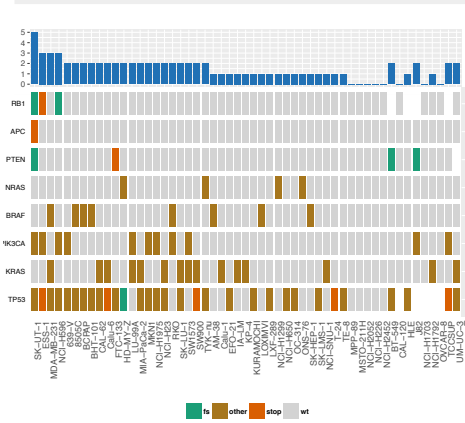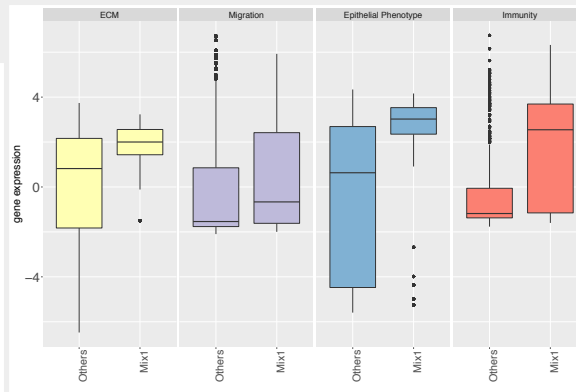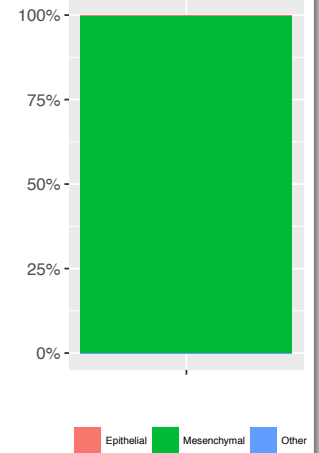

## Drug profile

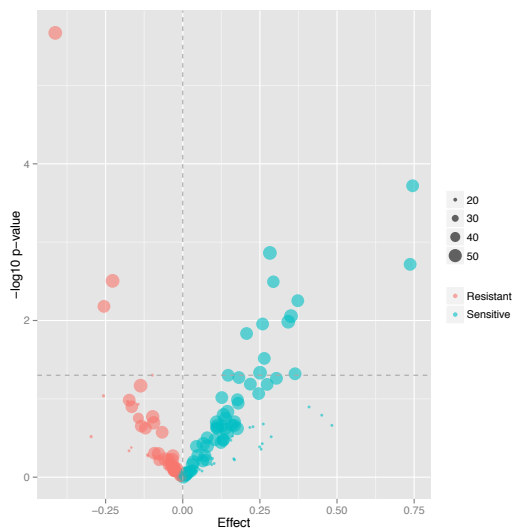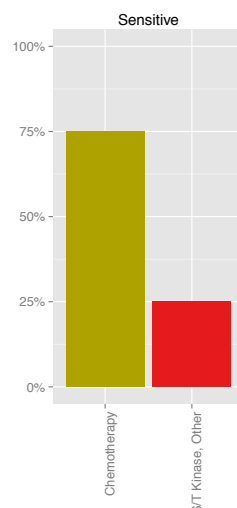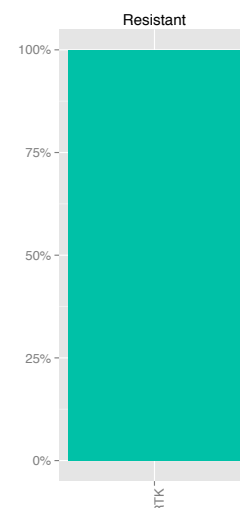

Drugs associated with the cluster (FDR < 0.05)

|             |           |
|-------------|-----------|
| GEMCITABINE | Sensible  |
| BLEOMYCIN   | Sensible  |
| VINBLASTINE | Sensible  |
| NVP-BEZ235  | Sensible  |
| GEFITINIB   | Resistant |
| BIBW2992    | Resistant |

# Haematopoietic and Lymphoid tissue Cluster - GDSC

## Cell lines in the cluster

|         |        |            |            |            |              |          |
|---------|--------|------------|------------|------------|--------------|----------|
| 697     | DEL    | HL-60      | KMS-12-BM  | MHH-CALL-4 | OCI-AML2     | SK-MM-2  |
| A3-KAW  | DOHH-2 | HT         | K052       | MJ         | OPM-2        | SKM-1    |
| AML-193 | Daudi  | HuNS1      | L-363      | MOLT-13    | P12-ICHIKAWA | SR       |
| BL-41   | EB2    | JVM-2      | L-428      | MOLT-16    | P31-FUJ      | ST486    |
| BL-70   | EHEB   | JVM-3      | L-540      | MOLT-4     | PF-382       | SU-DHL-1 |
| BV-173  | EM-2   | KARPAS-299 | LAMA-84    | MONO-MAC-6 | RL           | SUP-T1   |
| CA46    | GDM-1  | KARPAS-422 | LP-1       | NALM-1     | RPMI-8226    | TALL-1   |
| CMK     | HDLM-2 | KASUMI-1   | LOUCY      | NALM-6     | RPMI-8402    | THP-1    |
| CML-T1  | HEL    | KE-37      | MEG-01     | NB4        | RS4-11       | U-266    |
| DB      | HH     | KM-H2      | MHH-CALL-2 | NOMO-1     | Raji         |          |

## Tissue composition

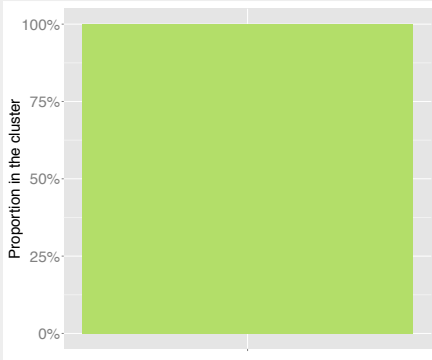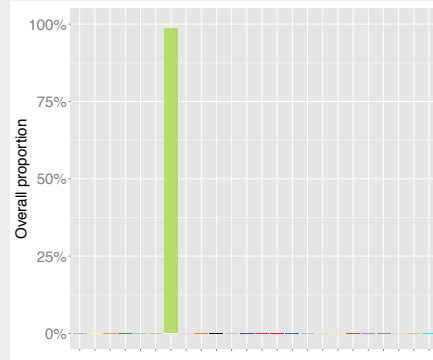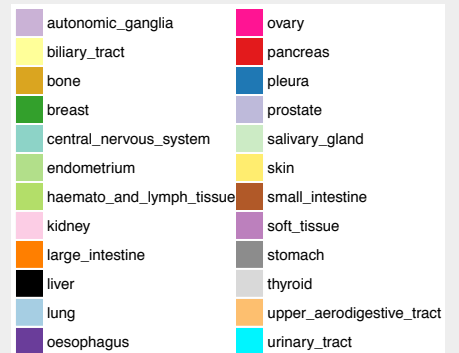

## Molecular profile

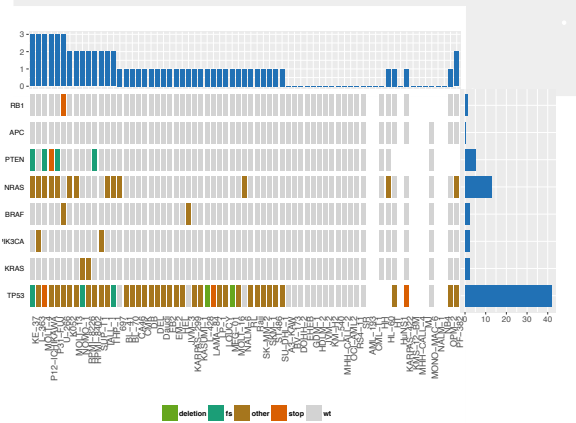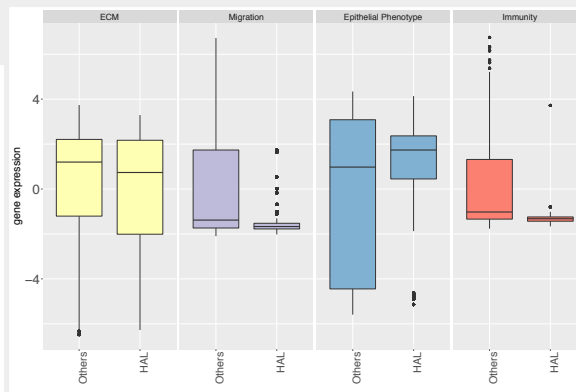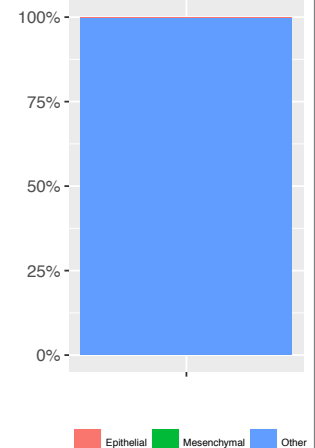

## Drug profile

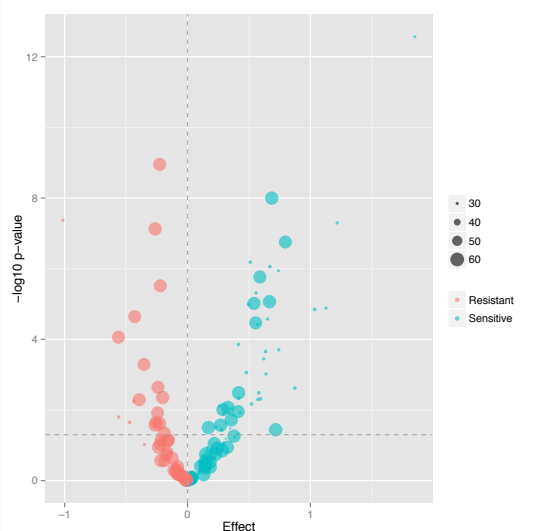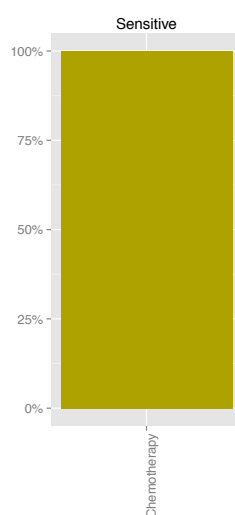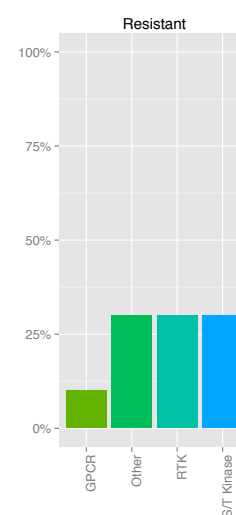

Drugs associated with the cluster (FDR < 0.05)

MIDOSTAURIN Sensible  
AICAR Resistant  
17AAG Resistant

# Mixed 2 Cluster - GDSC

## Cell lines in the cluster

|          |           |           |            |
|----------|-----------|-----------|------------|
| 769-P    | DU-145    | NCI-H2030 | RCC10RGB   |
| 786-0    | EFO-27    | NCI-H2228 | RERF-LC-MS |
| A498     | HEC-1     | NCI-H2405 | RMG-I      |
| A704     | IGROV-1   | NCI-H28   | SK-OV-3    |
| A549     | LU-65     | NCI-H460  | SNG-M      |
| ACHN     | NCI-H1355 | NCI-H838  | SNU-449    |
| AsPC-1   | NCI-H1563 | OAW-42    | NCI-SNU-5  |
| CAL-51   | NCI-H1651 | OS-RC-2   | SW1710     |
| CAL-54   | NCI-H1755 | PLC-PRF-5 | VMRC-RCZ   |
| COR-L105 | NCI-H1793 | PSN1      |            |

## Tissue composition

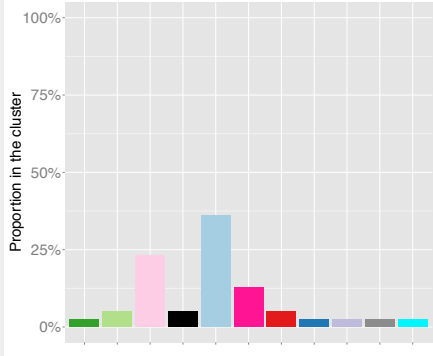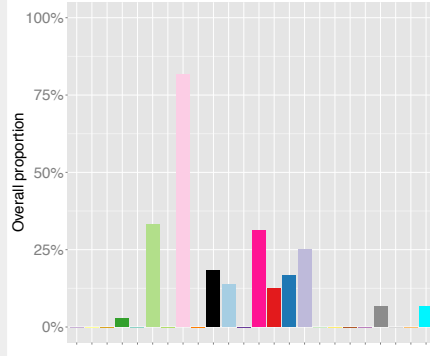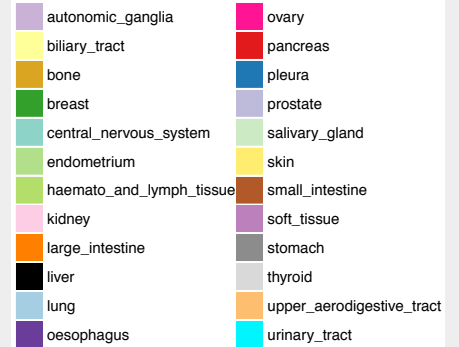

## Molecular profile

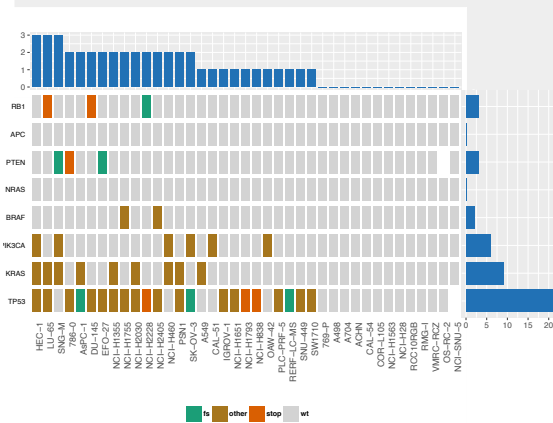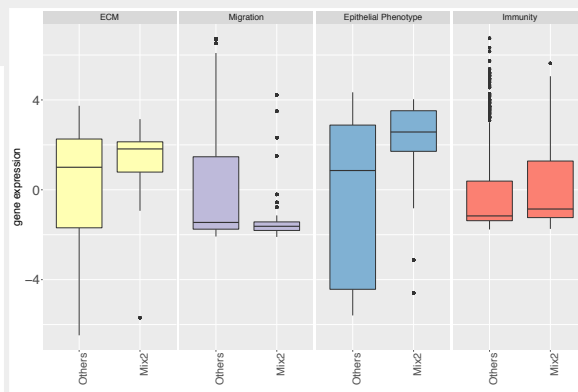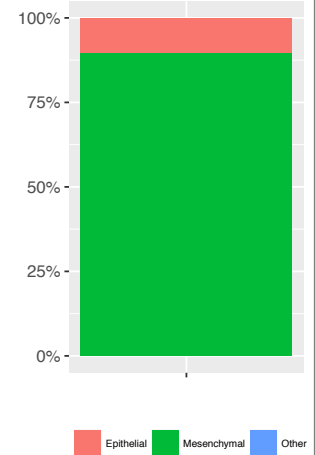

## Drug profile

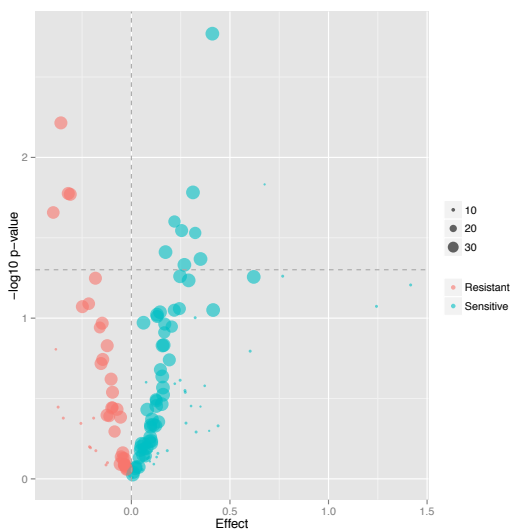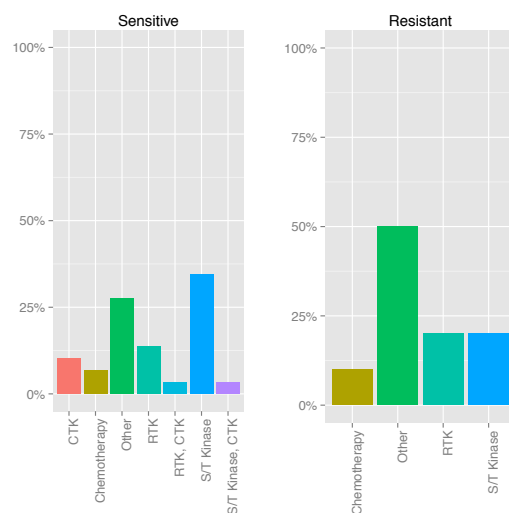

### Drugs associated with the cluster (FDR < 0.05)

|              |           |
|--------------|-----------|
| DASATINIB    | Sensible  |
| BORTEZOMIB   | Sensible  |
| MIDOSTAURIN  | Sensible  |
| CHIR-99021   | Sensible  |
| AZD6482      | Sensible  |
| BEXAROTENE   | Sensible  |
| LFM-A13      | Sensible  |
| PAZOPANIB    | Sensible  |
| VINBLASTINE  | Sensible  |
| DOCETAXEL    | Sensible  |
| TEMSIROLIMUS | Sensible  |
| ELESCLOMOL   | Sensible  |
| BX-795       | Sensible  |
| NVP-BEZ235   | Sensible  |
| GDC0941      | Sensible  |
| PAC-1        | Resistant |
| METHOTREXATE | Resistant |
| GEFITINIB    | Resistant |

# Glioma and Sarcoma Cluster - GDSC

## Cell lines in the cluster

|            |          |            |           |          |       |
|------------|----------|------------|-----------|----------|-------|
| 8-MG-BA    | GAMG     | IST-MES1   | NMC-G1    | SNU-475  | YH-13 |
| A172       | GCT      | KALS-1     | RPMI-7951 | SW1088   | YKG-1 |
| BFTC-909   | GI-1     | KNS-42     | S-117     | SW1783   |       |
| Becker     | GMS-10   | KNS-81-FD  | SF295     | TI-73    |       |
| CAS-1      | H4       | KS-1       | SF126     | T98G     |       |
| CCF-STTG1  | HCC1395  | LCLC-103H  | SJSA-1    | U-118-MG |       |
| CGTH-W-1   | HOS      | MDA-MB-157 | SK-MES-1  | U-2-OS   |       |
| DBTRG-05MG | HT-1080  | MG-63      | SNB19     | U251     |       |
| DK-MG      | Hs-578-T | MOG-G-CCM  | SNU-387   | U-87-MG  |       |
| Daoy       | HuH-28   | MOG-G-UVV  | SNU-423   | WM-115   |       |

## Tissue composition

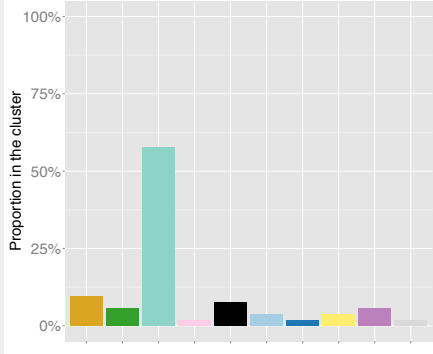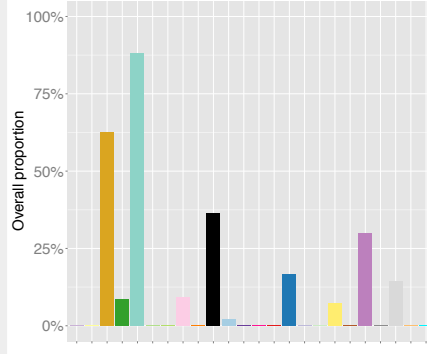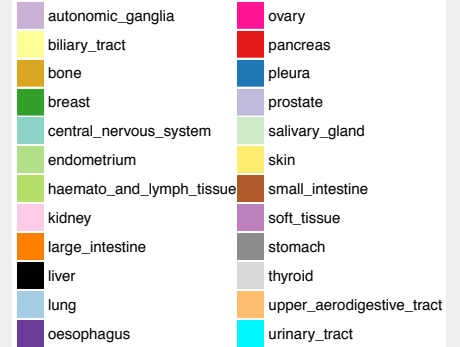

## Molecular profile

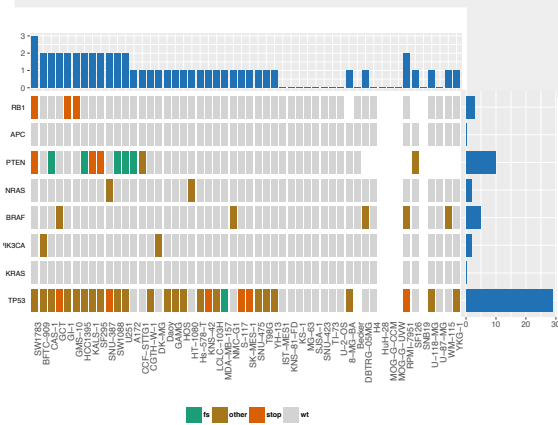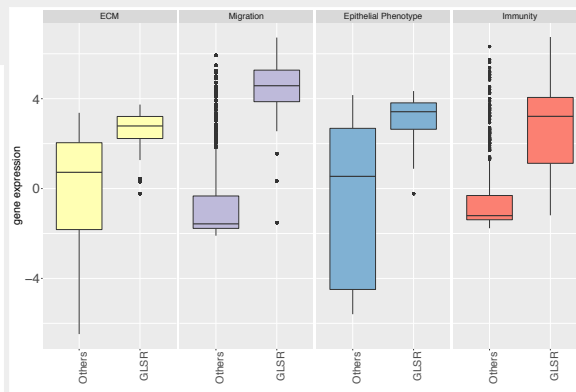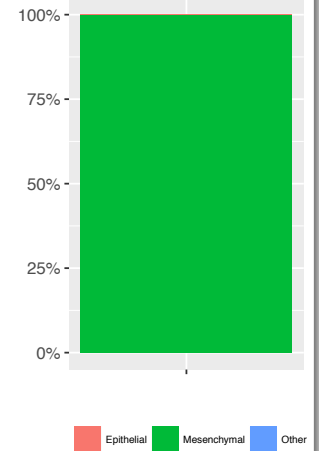

## Drug profile

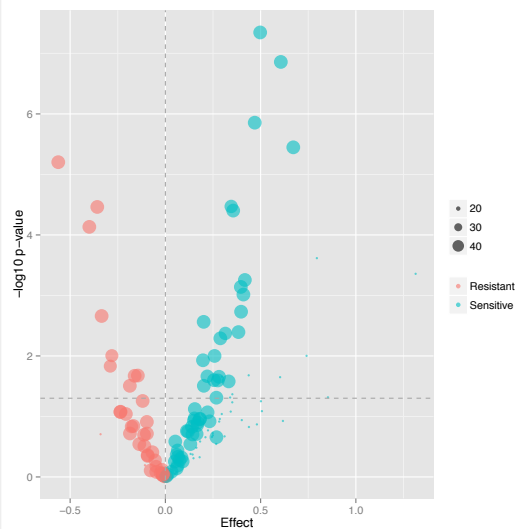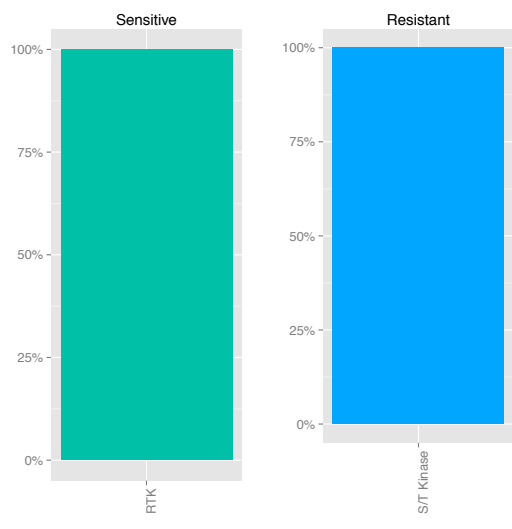

Drugs associated with the cluster (FDR < 0.05)

|              |           |
|--------------|-----------|
| VORINOSTAT   | Sensible  |
| Z-LLNLE-CHO- | Resistant |
| DASATINIB    | Resistant |
| BICALUTAMIDE | Resistant |
| BIBW2992     | Resistant |

# Mixed 3 Cluster - GDSC

## Cell lines in the cluster

|              |              |           |         |         |
|--------------|--------------|-----------|---------|---------|
| A204         | DMS-273      | MHH-ES-1  | NCI-H82 | SK-N-FI |
| A673         | ECC12        | MHH-NB-11 | NH-6    | Saos-2  |
| A2780        | G-401        | NB1       | RD      |         |
| AN3-CA       | HGC-27       | NCI-H1155 | RH-18   |         |
| CHL-1        | HUTU-80      | NCI-H2227 | SBC-5   |         |
| CHP-212      | KP-N-RT-BM-1 | NCI-H446  | SHP-77  |         |
| COLO-320-HSR | KP-N-S19s    | NCI-H522  | SIMA    |         |
| CPC-N        | KP-N-YN      | NCI-H524  | SJRH30  |         |
| D-283MED     | MES-SA       | NCI-H661  | SK-N-AS |         |
| DMS-114      | MFE-296      | NCI-H716  | SK-N-DZ |         |

## Tissue composition

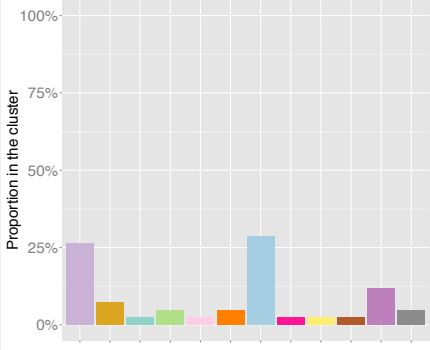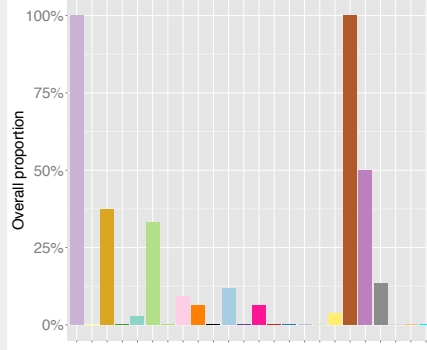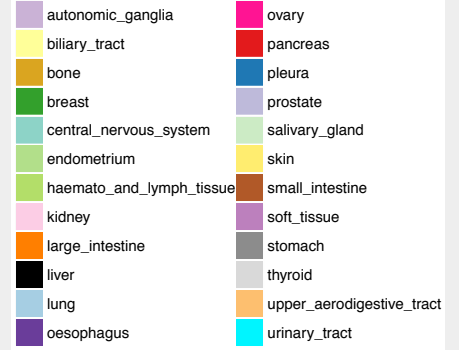

## Molecular profile

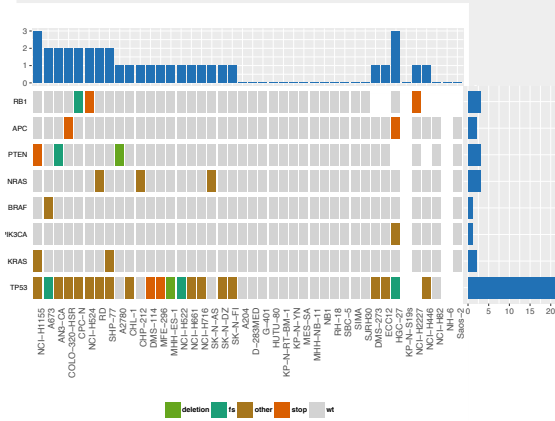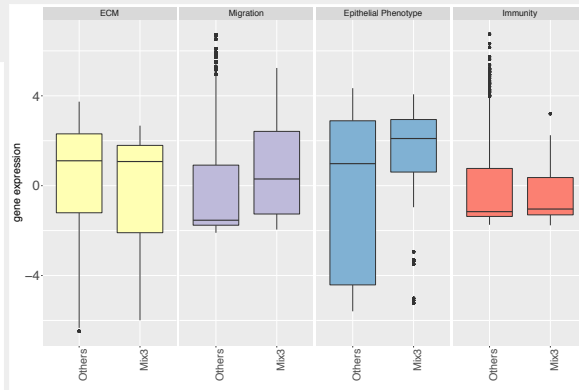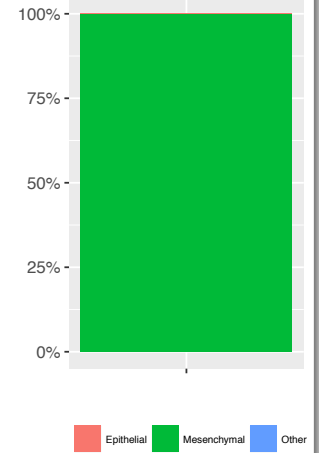

## Drug profile

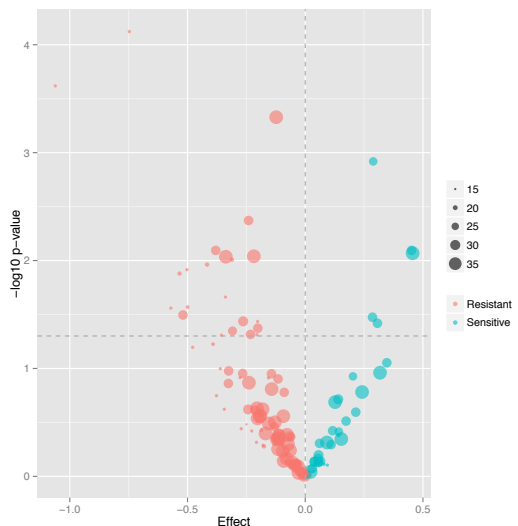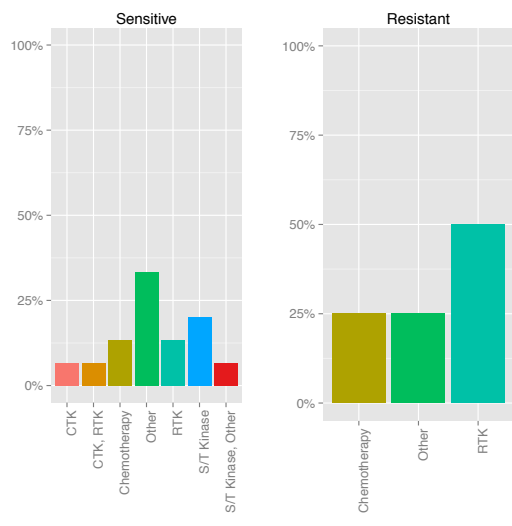

### Drugs associated with the cluster (FDR < 0.05)

|                     |           |
|---------------------|-----------|
| ERLOTINIB           | Sensible  |
| LAPATINIB           | Sensible  |
| VINORELBINE         | Sensible  |
| BICALUTAMIDE        | Sensible  |
| PF-562271           | Sensible  |
| OBATOCCLAX-MESYLATE | Sensible  |
| EPOTHILONE-B        | Sensible  |
| AICAR               | Sensible  |
| VINBLASTINE         | Sensible  |
| DOCETAXEL           | Sensible  |
| GEFITINIB           | Sensible  |
| BOSUTINIB           | Sensible  |
| 17AAG               | Sensible  |
| BIBW2992            | Sensible  |
| CYCLOPAMINE         | Resistant |
| GSK269962A          | Resistant |
| PAZOPANIB           | Resistant |
| SB-216763           | Resistant |

# Aerodigestive tract Cluster - GDSC

## Cell lines in the cluster

|           |            |          |           |        |          |
|-----------|------------|----------|-----------|--------|----------|
| 5637      | Detroit562 | KNS-62   | KYSE-70   | SCC-4  | TE-15    |
| A253      | EC-GI-10   | KU-19-19 | LC-1F     | SCC-9  | TE-5     |
| BFTC-905  | EPLC-272H  | KYSE-140 | NCI-H1666 | SW1990 | TE-6     |
| BHY       | FADU       | KYSE-150 | NCI-H292  | SW780  | TE-9     |
| BxPC-3    | HCC1806    | KYSE-180 | NUGC-3    | SW403  | VM-CUB-1 |
| CAL-27    | HCT-116    | KYSE-270 | PC-14     | SW48   |          |
| CAL-33    | HSC-2      | KYSE-410 | PC-3      | SW620  |          |
| COLO-680N | HSC-3      | KYSE-450 | RT-112    | TE-1   |          |
| Calu-3    | HSC-4      | KYSE-510 | SCC-15    | TE-10  |          |
| DU-4475   | HuP-T3     | KYSE-520 | SCC-25    | TE-11  |          |

## Tissue composition

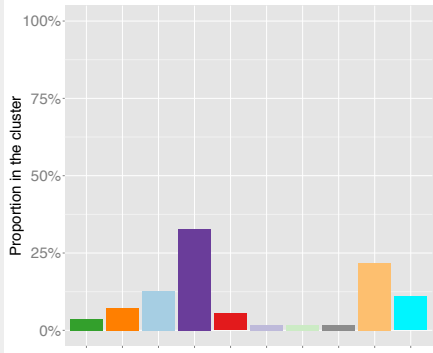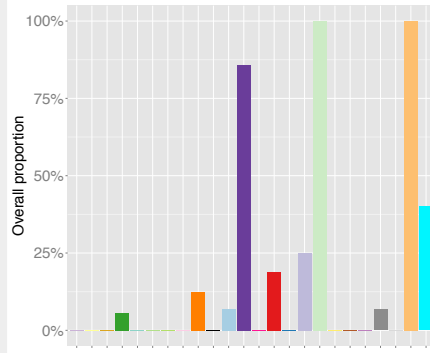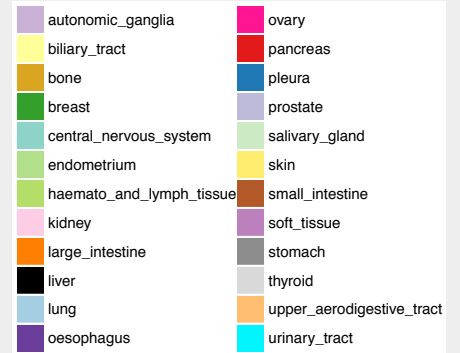

## Molecular profile

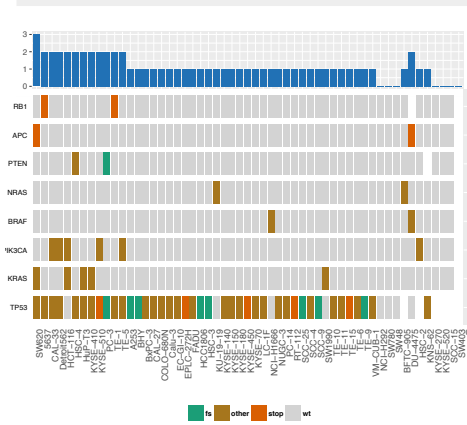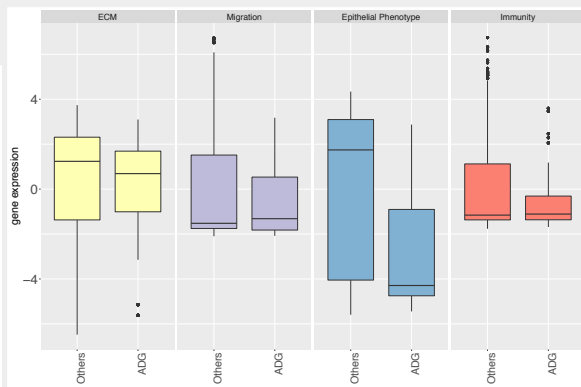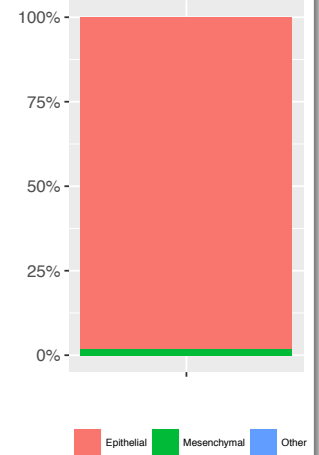

## Drug profile

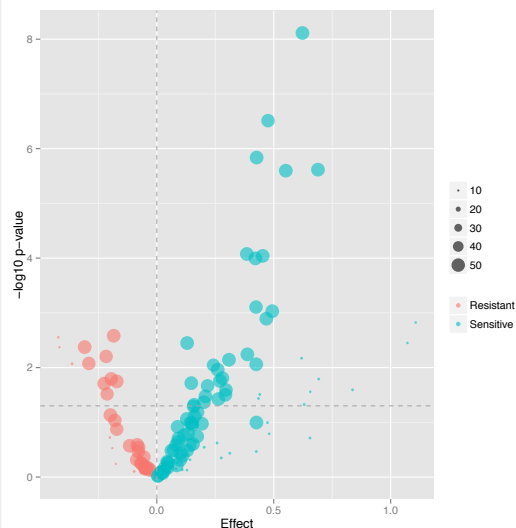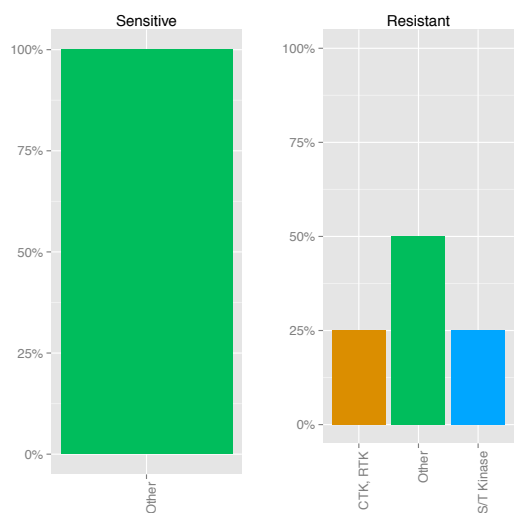

### Drugs associated with the cluster (FDR < 0.05)

|               |           |
|---------------|-----------|
| DOXORUBICIN   | Sensible  |
| CYCLOPAMINE   | Resistant |
| CRIZOTINIB    | Resistant |
| PYRIMETHAMINE | Resistant |
| ATRA          | Resistant |
| TEMSIROLIMUS  | Resistant |
| VX-702        | Resistant |

# Skin Cluster - GDSC

## Cell lines in the cluster

|          |           |           |
|----------|-----------|-----------|
| A375     | IGR-1     | SK-MEL-3  |
| A101D    | IPC-298   | SK-MEL-30 |
| A2058    | MEL-HO    | SK-MEL-5  |
| C32      | MEL-JUSO  | UACC-257  |
| COLO-741 | Malme-3M  | UACC-62   |
| COLO-792 | Mewo      |           |
| COLO-679 | RVH-421   |           |
| COLO-800 | SK-MEL-2  |           |
| G-361    | SK-MEL-24 |           |
| HT-144   | SK-MEL-28 |           |

## Tissue composition

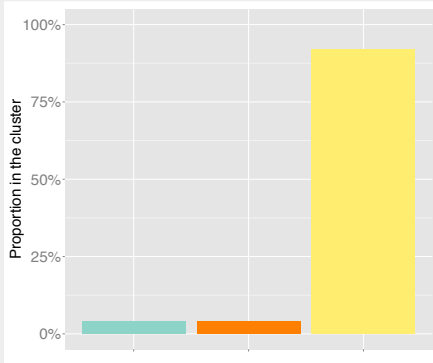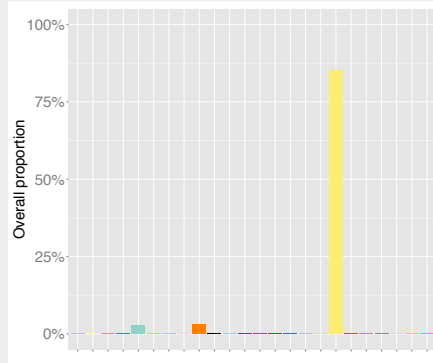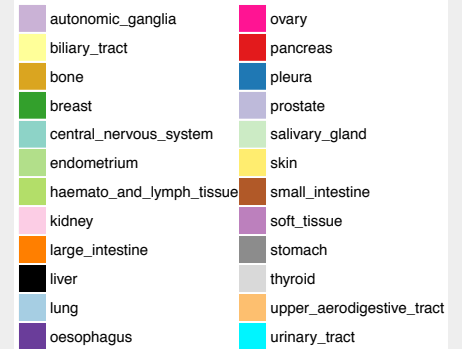

## Molecular profile

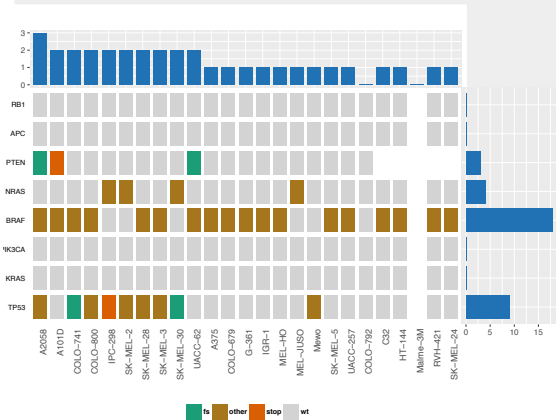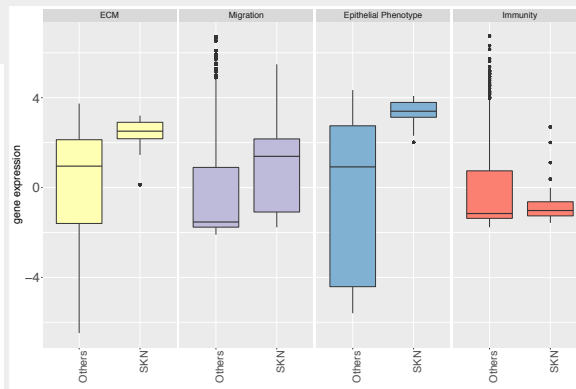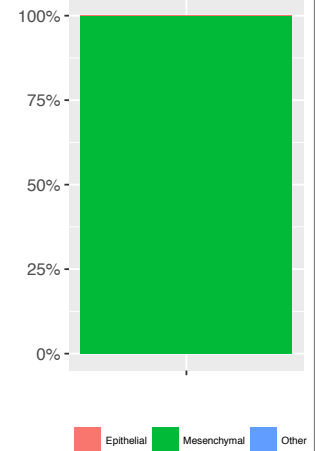

## Drug profile

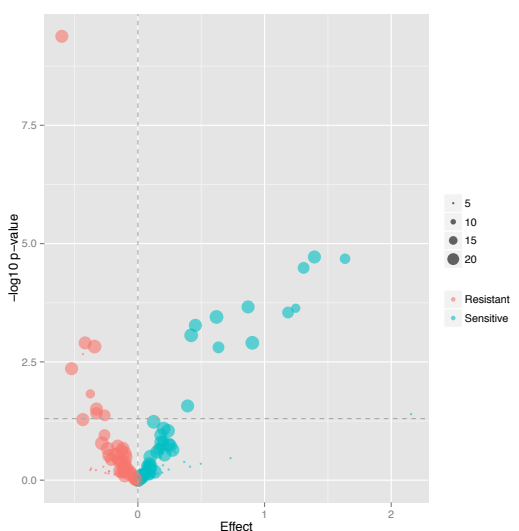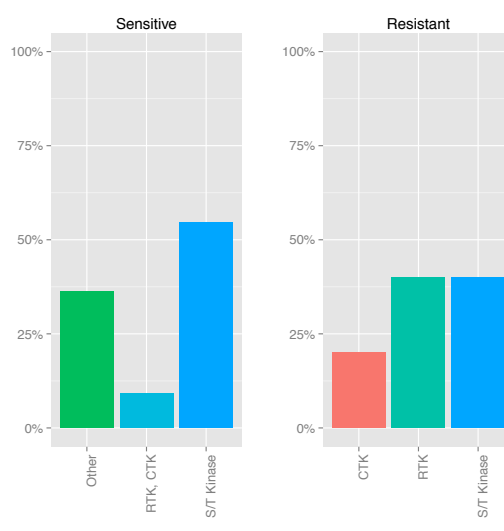

### Drugs associated with the cluster (FDR < 0.05)

|                    |           |
|--------------------|-----------|
| EMBELIN            | Sensible  |
| FH535              | Sensible  |
| OBATOCLAX-MESYLATE | Sensible  |
| RDEA119            | Sensible  |
| CI-1040            | Sensible  |
| CEP-701            | Sensible  |
| PLX4720            | Sensible  |
| NUTLIN3            | Sensible  |
| PD0325901          | Sensible  |
| SB590885           | Sensible  |
| AZD6244            | Sensible  |
| WZ-1-84            | Resistant |
| AKT-INHIBITOR-VIII | Resistant |
| AICAR              | Resistant |
| GEFITINIB          | Resistant |
| BIBW2992           | Resistant |



# Breast Cluster - GDSC

## Cell lines in the cluster

|           |         |                |           |          |
|-----------|---------|----------------|-----------|----------|
| ABC-1     | GCIY    | HCC70          | NCI-H1573 | UACC-812 |
| BT-20     | HCC1143 | MCF7           | NCI-H1650 | ZR-75-30 |
| CAL-148   | HCC1187 | MDA-MB-175-VII | NCI-H1693 |          |
| CAL-85-1  | HCC1419 | MDA-MB-361     | NCI-H2126 |          |
| CAMA-1    | HCC1599 | MDA-MB-415     | NCI-H2170 |          |
| Caov-3    | HCC1937 | MDA-MB-453     | NCI-H2342 |          |
| Caov-4    | HCC1954 | MDA-MB-468     | OVCAR-3   |          |
| ChaGo-K-1 | HCC2157 | MFE-280        | OAW-28    |          |
| EFM-19    | HCC2218 | NCI-H1395      | OVCAR-4   |          |
| EVSA-T    | HCC38   | NCI-H1437      | T47D      |          |

## Tissue composition

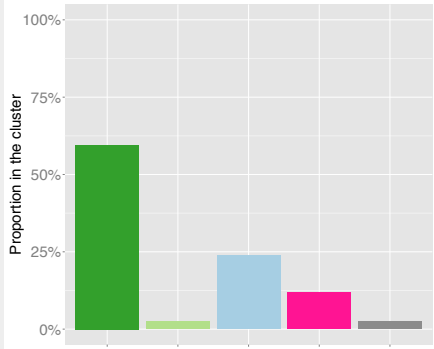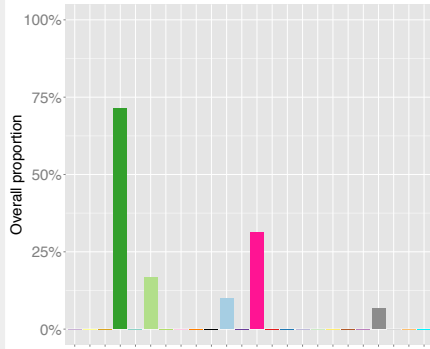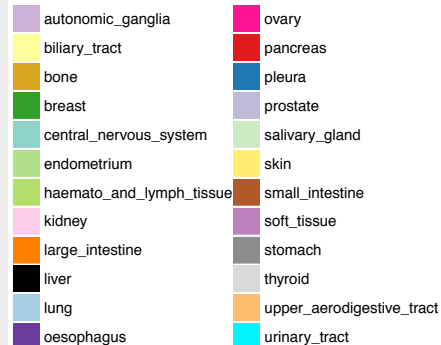

## Molecular profile

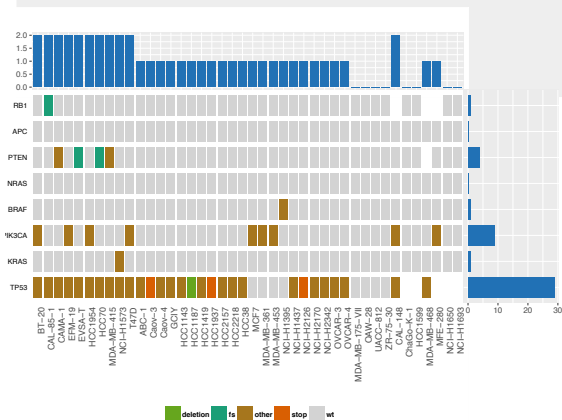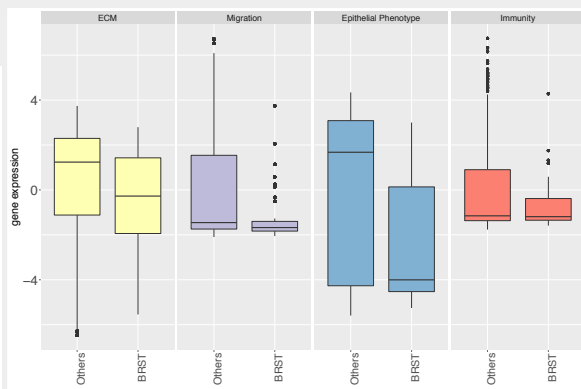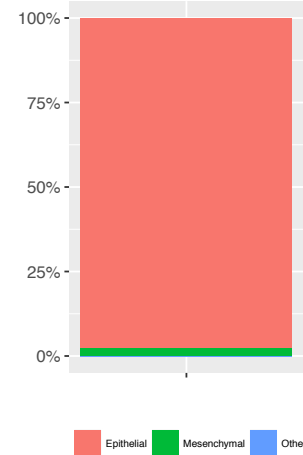

## Drug profile

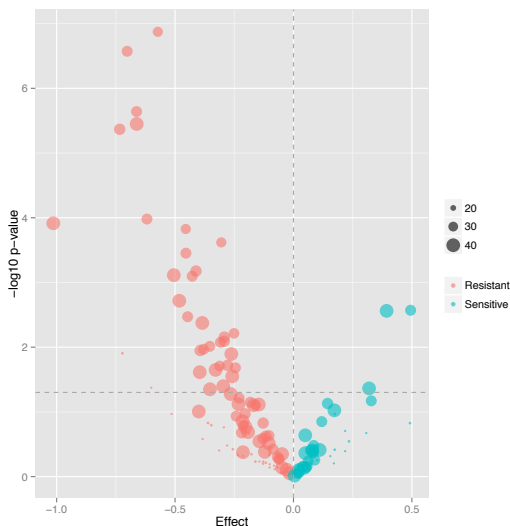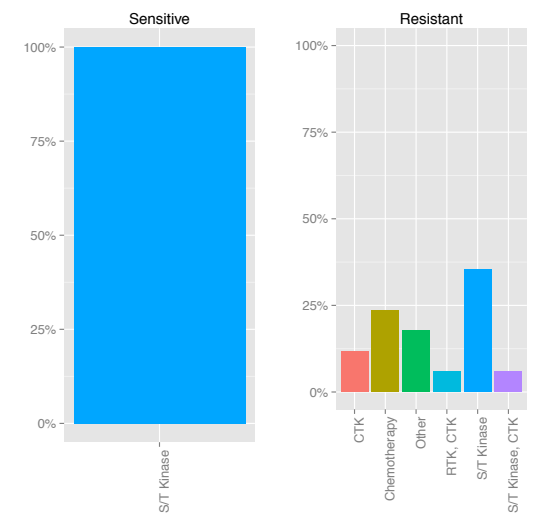

### Drugs associated with the cluster (FDR < 0.05)

|                     |           |
|---------------------|-----------|
| AKT-INHIBITOR-VIII  | Sensitive |
| MK-2206             | Sensitive |
| GEMCITABINE         | Resistant |
| AP-24534            | Resistant |
| DMOG                | Resistant |
| BAY-61-3606         | Resistant |
| OBATOCCLAX-MESYLATE | Resistant |
| CAMPTOTHECIN-WTSI   | Resistant |
| CYTARABINE          | Resistant |
| METHOTREXATE        | Resistant |
| RDEA119             | Resistant |
| CI-1040             | Resistant |
| AZD-2281            | Resistant |
| CEP-701             | Resistant |
| SB-216763           | Resistant |
| BX-795              | Resistant |
| BI-D1870            | Resistant |
| 681640              | Resistant |
| AZD6244             | Resistant |
